# Supplementary material for: Five shades of green: substituent influence on the (spectro-) electrochemical properties of diferrocenyl(phenyl)methylium dyes
Source: Royal Society of Chemistry journal article supplement (doi:10.1039/d1dt03009d), 2021-01-01
Supplement: d1dt03009d1.pdf [file d1dt03009d1.pdf]

## Supporting Information

### Five Shades of Green: Substituent Influence on the (Spectro-) Electrochemical Properties of Diferrocenylphenyl Methylum Dyes

Larissa A. Casper,<sup>a</sup> Viktoria Ebel<sup>a</sup>, Michael Linseis<sup>a</sup>, and Rainer F. Winter<sup>\*a</sup>

#### Table of Contents

|                                                                       |    |
|-----------------------------------------------------------------------|----|
| Supporting Information.....                                           | 1  |
| NMR-Spectroscopy.....                                                 | 3  |
| Mass Spectrometry .....                                               | 17 |
| Hammett Plots: Part I .....                                           | 20 |
| T-dependent NMR spectroscopy.....                                     | 21 |
| XRD- Crystal Data.....                                                | 23 |
| Crystal data and structure refinement for <b>1-OH</b> .....           | 24 |
| Crystal data and structure refinement for <b>2-OH</b> .....           | 27 |
| Crystal data and structure refinement for <b>3-OH</b> .....           | 30 |
| Crystal data and structure refinement for <b>4-OH</b> .....           | 33 |
| Crystal data and structure refinement for <b>5-OH</b> .....           | 36 |
| Crystal data and structure refinement for <b>1<sup>+</sup></b> .....  | 40 |
| Crystal data and structure refinement for <b>4<sup>+</sup></b> .....  | 44 |
| Crystal data and structure refinement for <b>5<sup>+</sup></b> .....  | 47 |
| Cyclic Voltammetry .....                                              | 50 |
| Hammett Plots: Part II .....                                          | 54 |
| UV/Vis/NIR Spectro(electro)chemical Data and TD-DFT calculations..... | 56 |
| T-dependent and quantitative EPR Spectroscopy.....                    | 62 |
| T-dependent EPR Spectroscopy .....                                    | 63 |
| Spin counting quantification method.....                              | 63 |
| References.....                                                       | 66 |

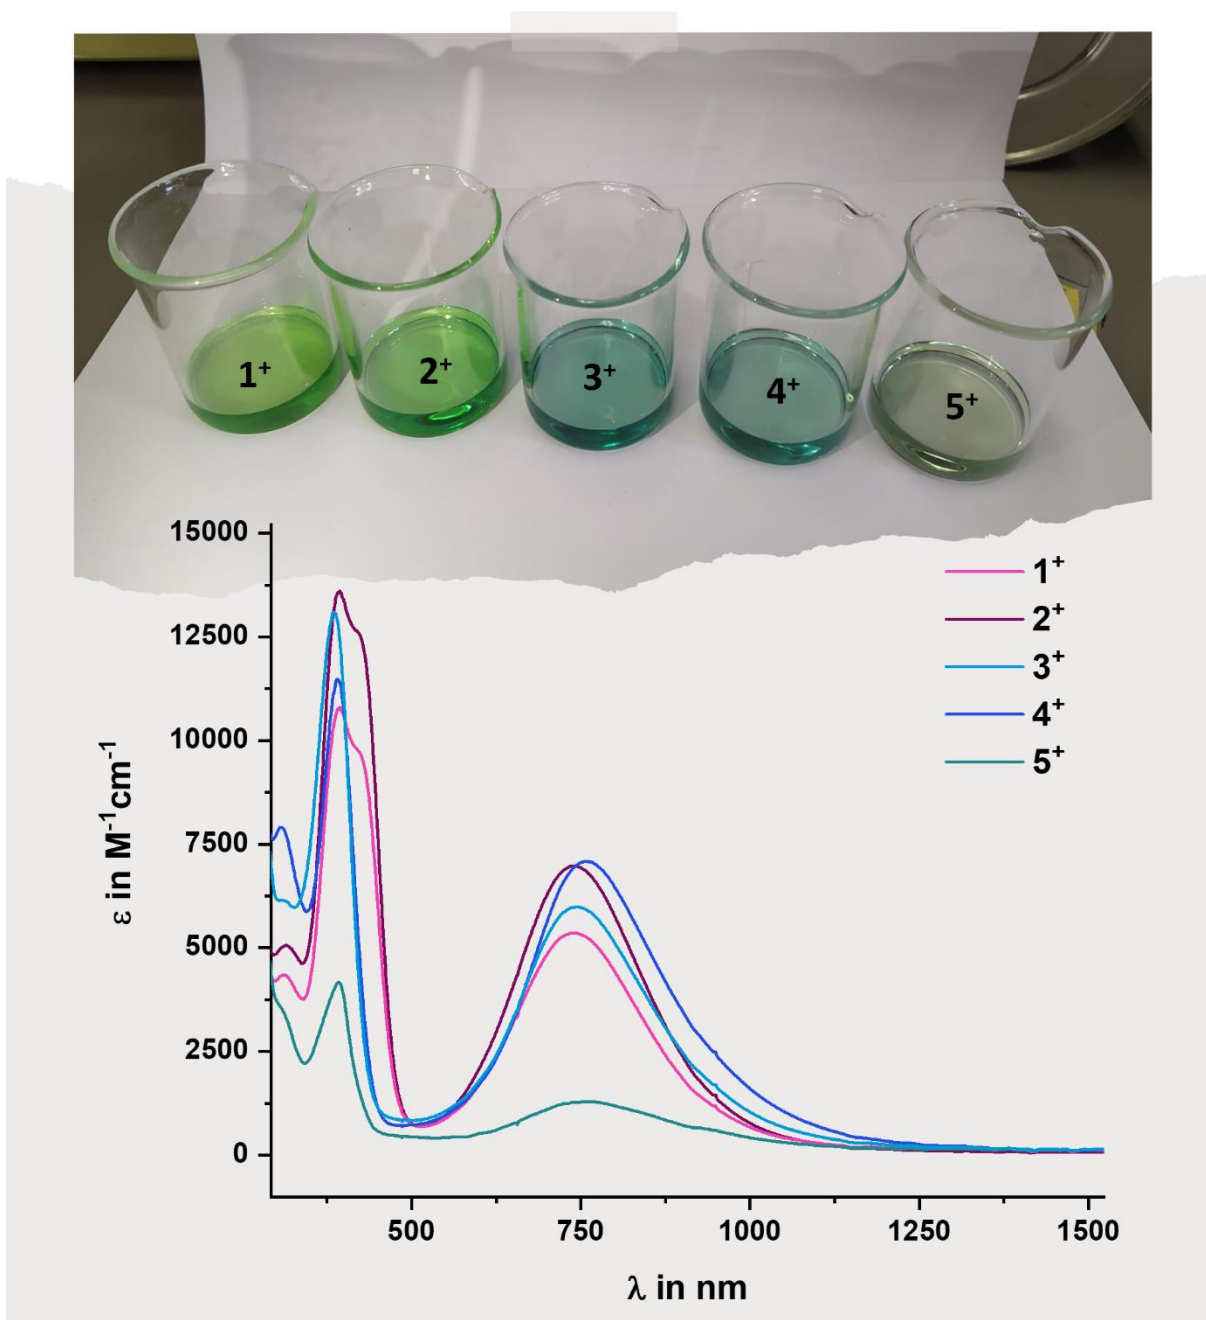

Figure S1: Top: Picture taken of complex cations 1<sup>+</sup>-5<sup>+</sup> under ambient conditions, demonstrating their stability; Bottom: Comparison of the UV/Vis/NIR spectra of the five cations.

## NMR-Spectroscopy

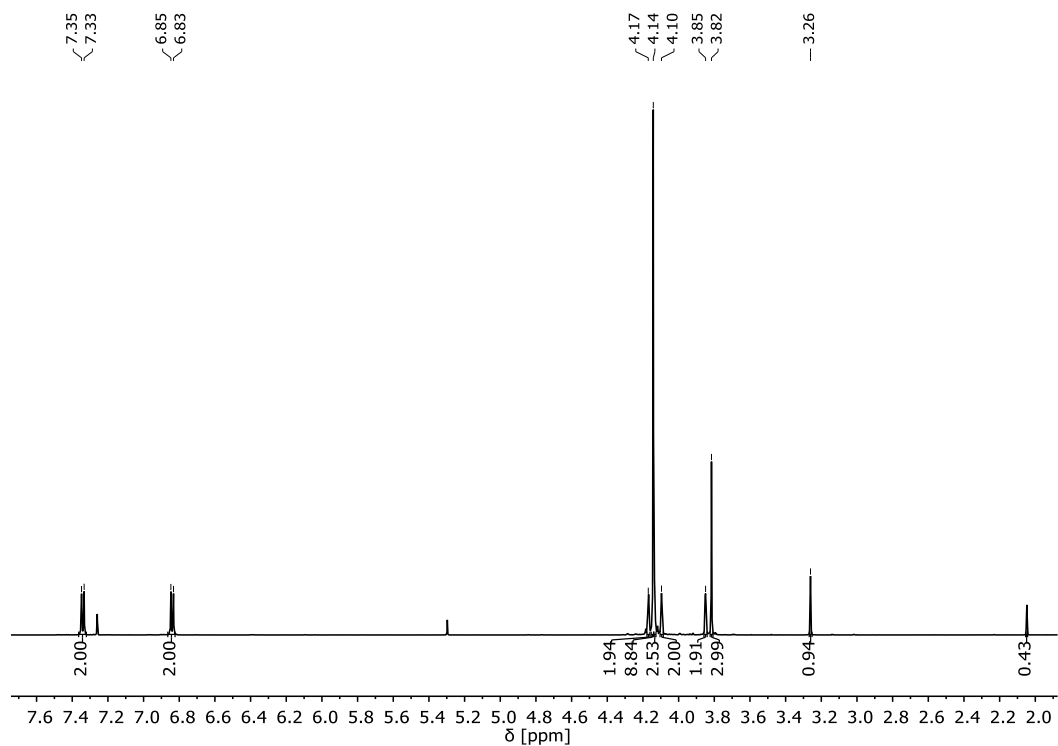

Figure S2:  $^1\text{H-NMR}$  spectrum of **1-OH** ( $\text{CDCl}_3$ , 400 MHz).

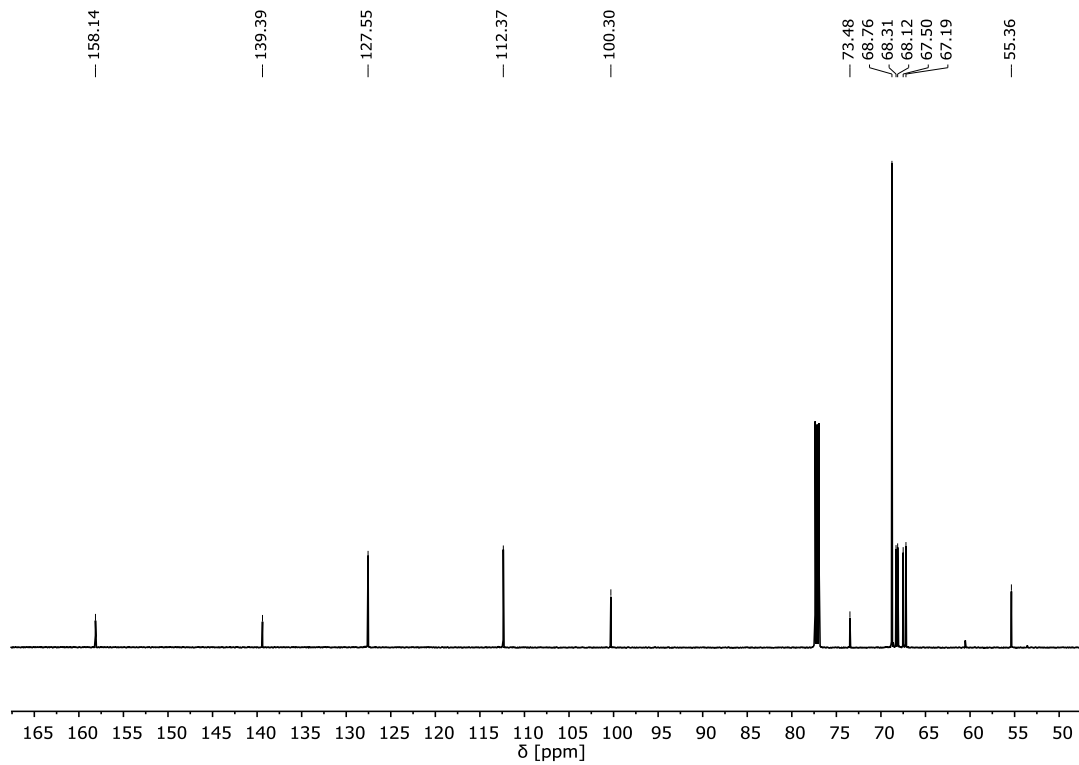

Figure S3:  $^{13}\text{C-NMR}$  spectrum of **1-OH** ( $\text{CDCl}_3$ , 400 MHz).

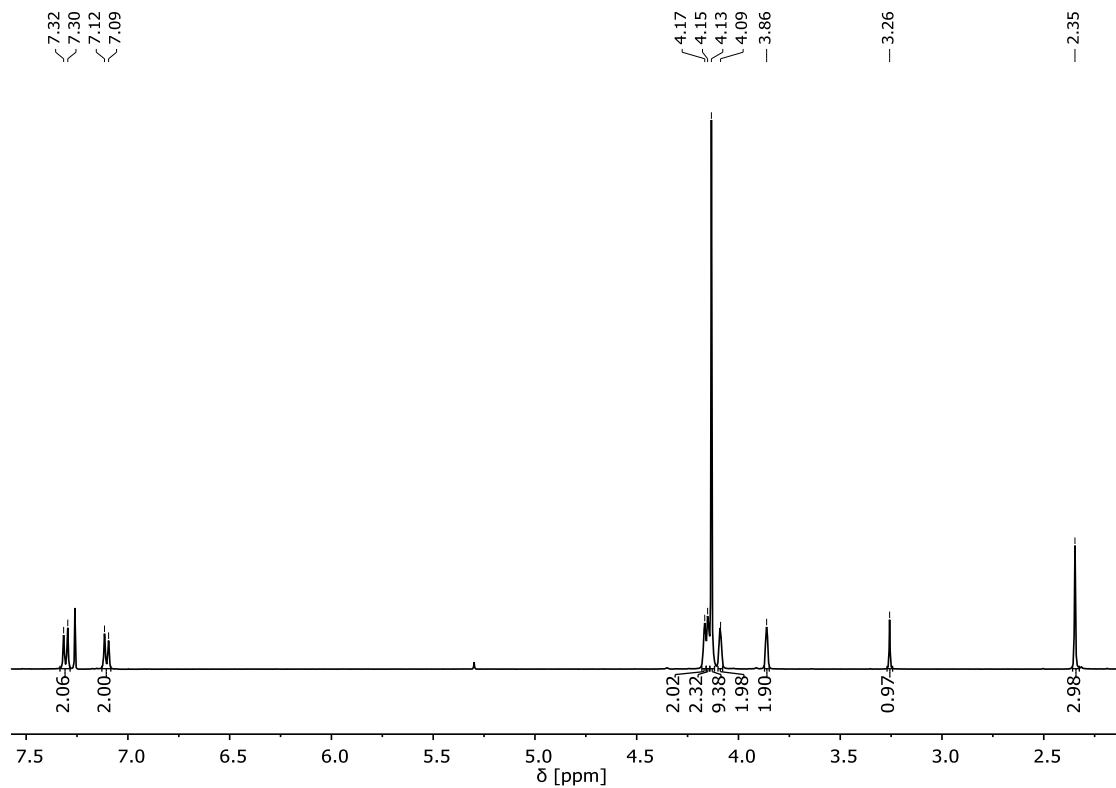

Figure S4:  $^1\text{H-NMR}$  spectrum of **2-OH** ( $\text{CDCl}_3$ , 400 MHz).

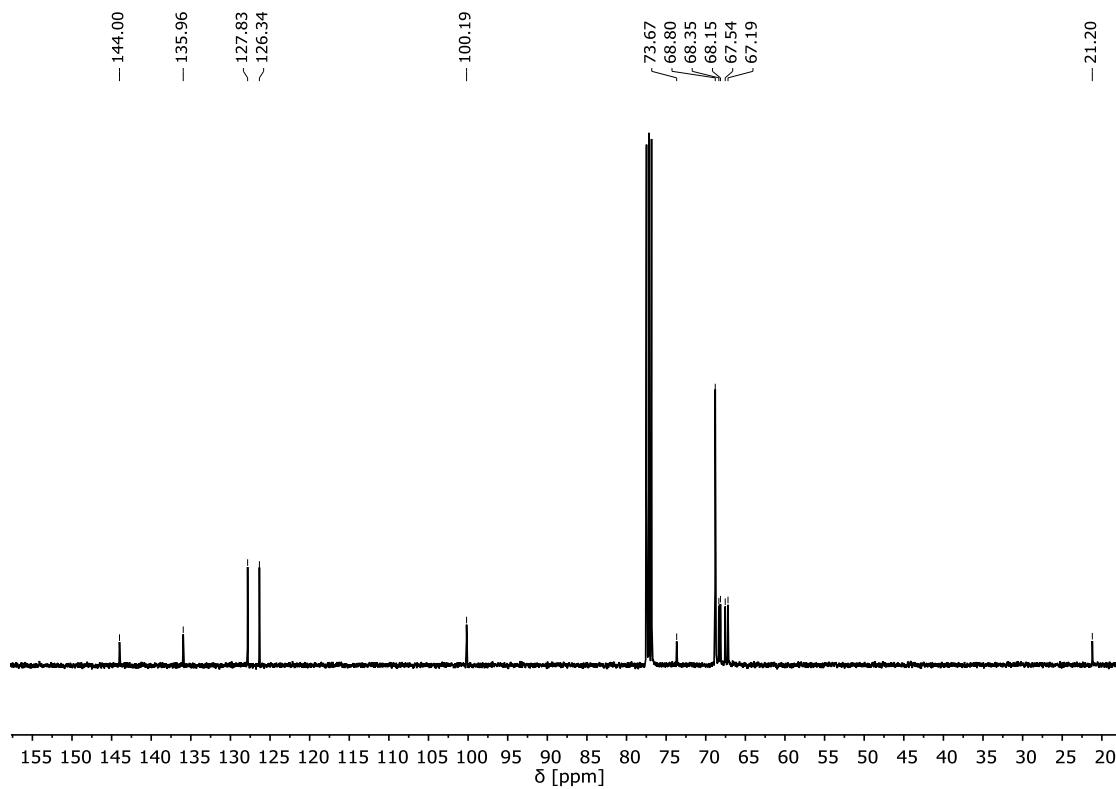

Figure S5:  $^{13}\text{C-NMR}$  spectrum of **2-OH** ( $\text{CDCl}_3$ , 400 MHz).

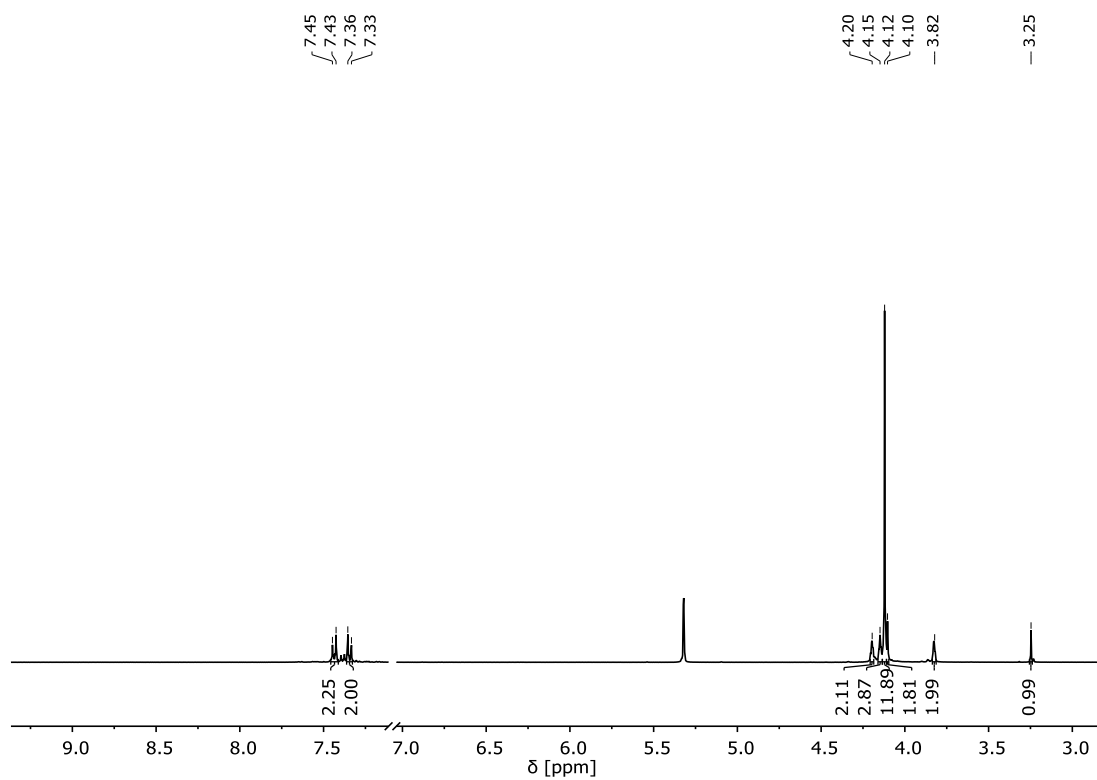

Figure S6:  $^1\text{H}$ -NMR spectrum of **3-OH** ( $\text{CD}_2\text{Cl}_2$ , 400 MHz).

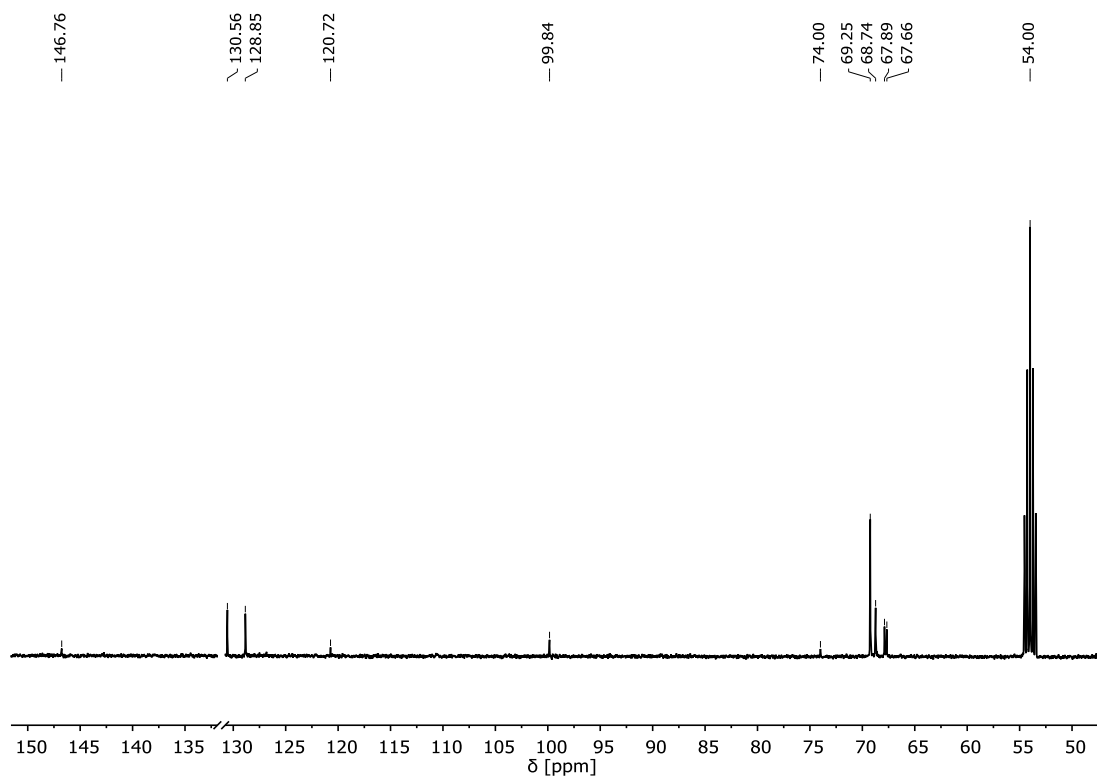

Figure S7:  $^{13}\text{C}$ -NMR spectrum of **3-OH** ( $\text{CD}_2\text{Cl}_2$ , 400 MHz).

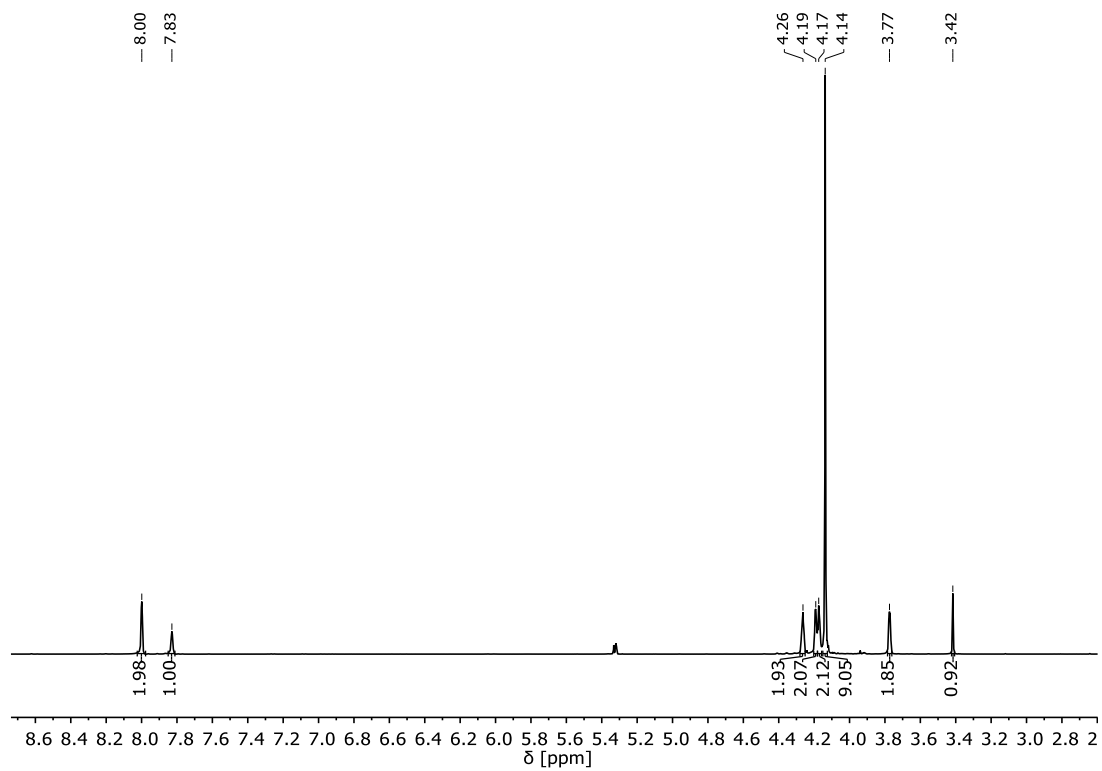

Figure S8:  $^1\text{H}$ -NMR spectrum of **4-OH** ( $\text{CD}_2\text{Cl}_2$ , 400 MHz).

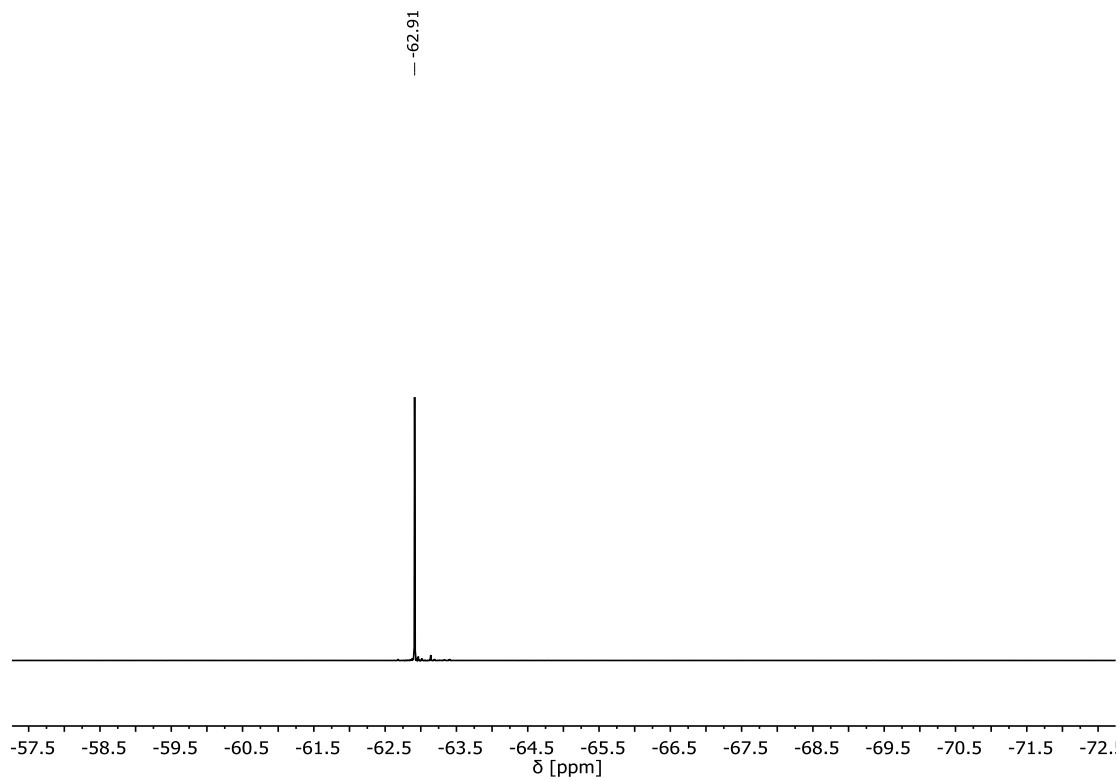

Figure S9:  $^{19}\text{F}$ -NMR spectrum of **4-OH** ( $\text{CD}_2\text{Cl}_2$ , 400 MHz).

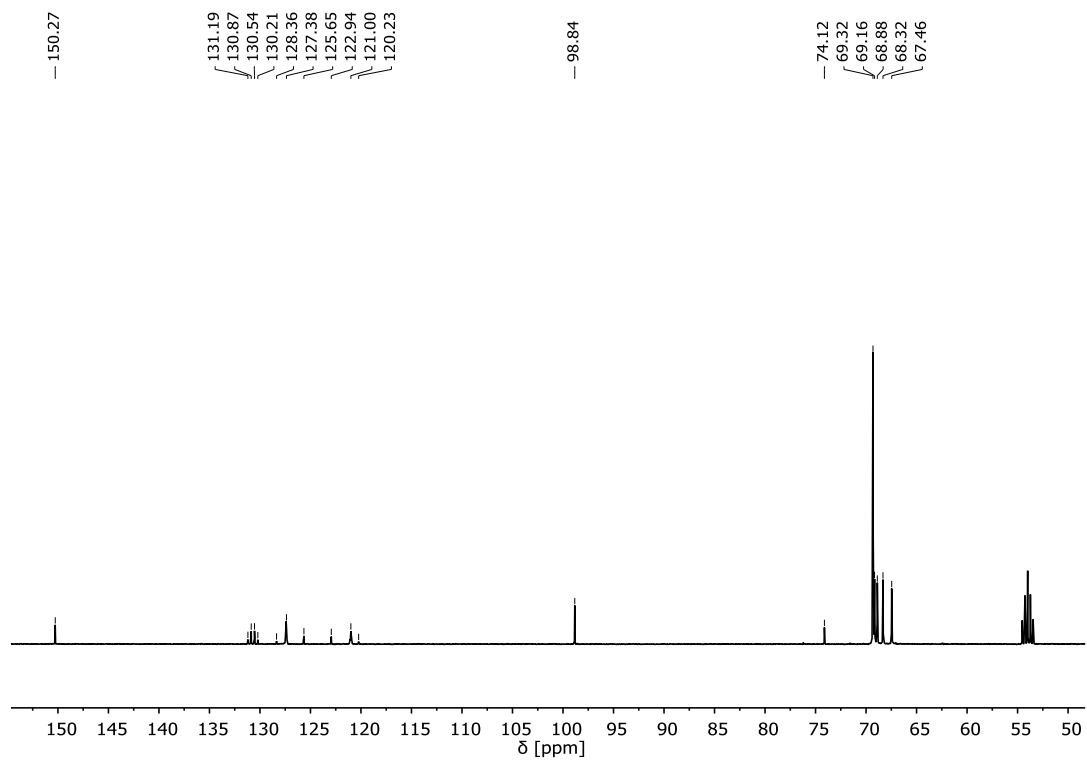

Figure S10:  $^{13}\text{C}$ -NMR spectrum of **4-OH** ( $\text{CD}_2\text{Cl}_2$ , 400 MHz).

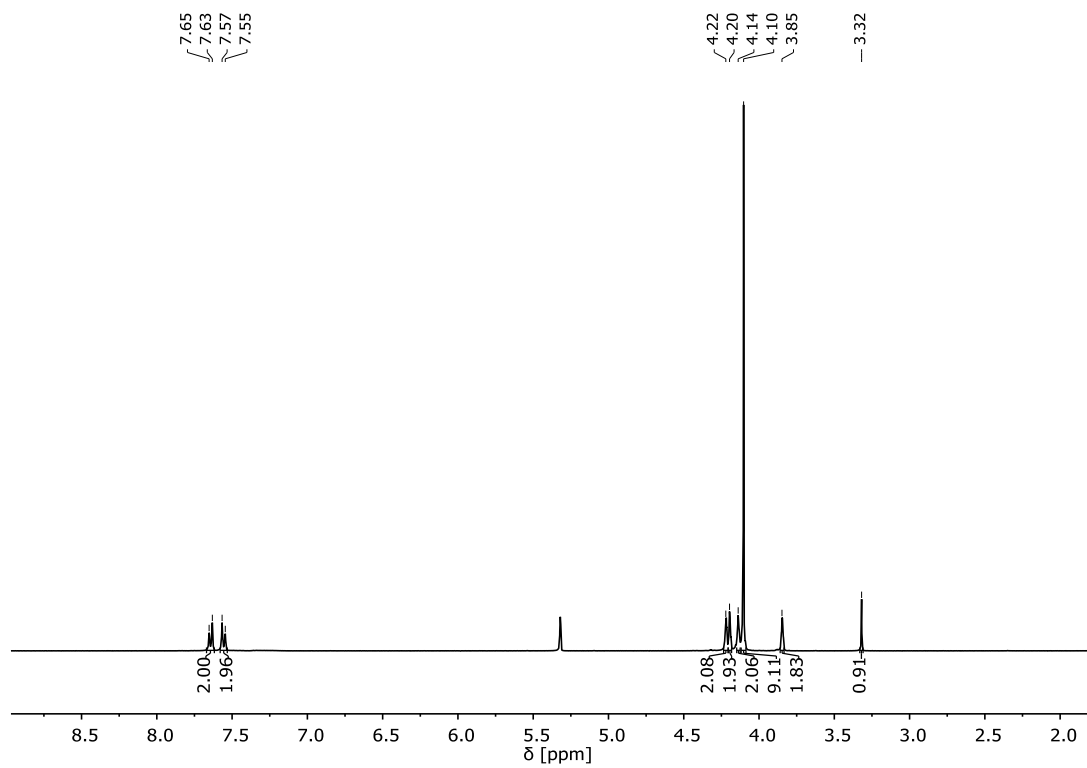

Figure S11:  $^1\text{H}$ -NMR spectrum of **5-OH** ( $\text{CD}_2\text{Cl}_2$ , 400 MHz).

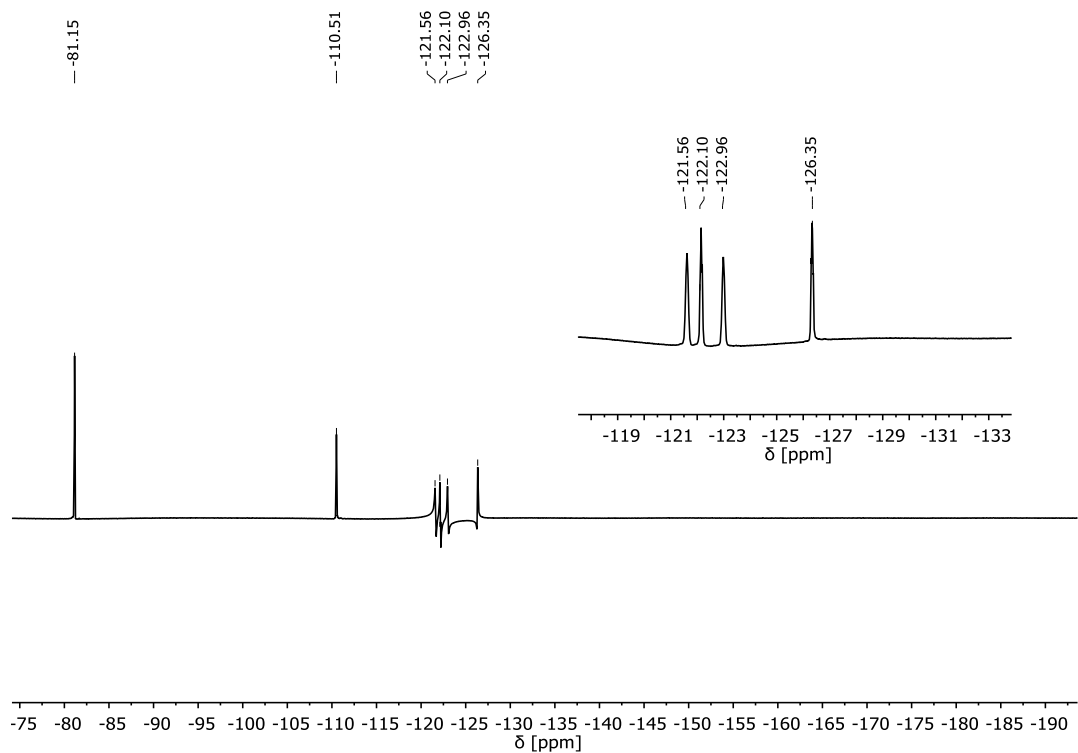

Figure S12:  $^{19}\text{F}$ -NMR spectrum of **5-OH** ( $\text{CD}_2\text{Cl}_2$ , 400 MHz).

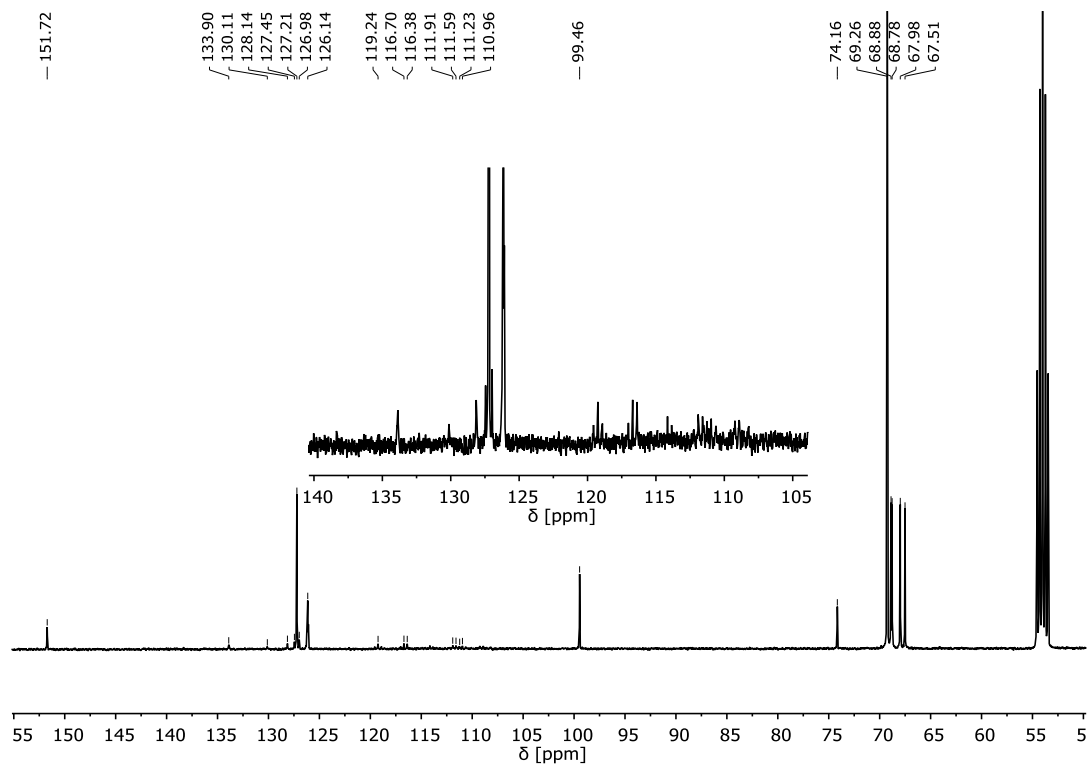

Figure S13:  $^{13}\text{C}$ -NMR spectrum of **5-OH** ( $\text{CD}_2\text{Cl}_2$ , 400 MHz).



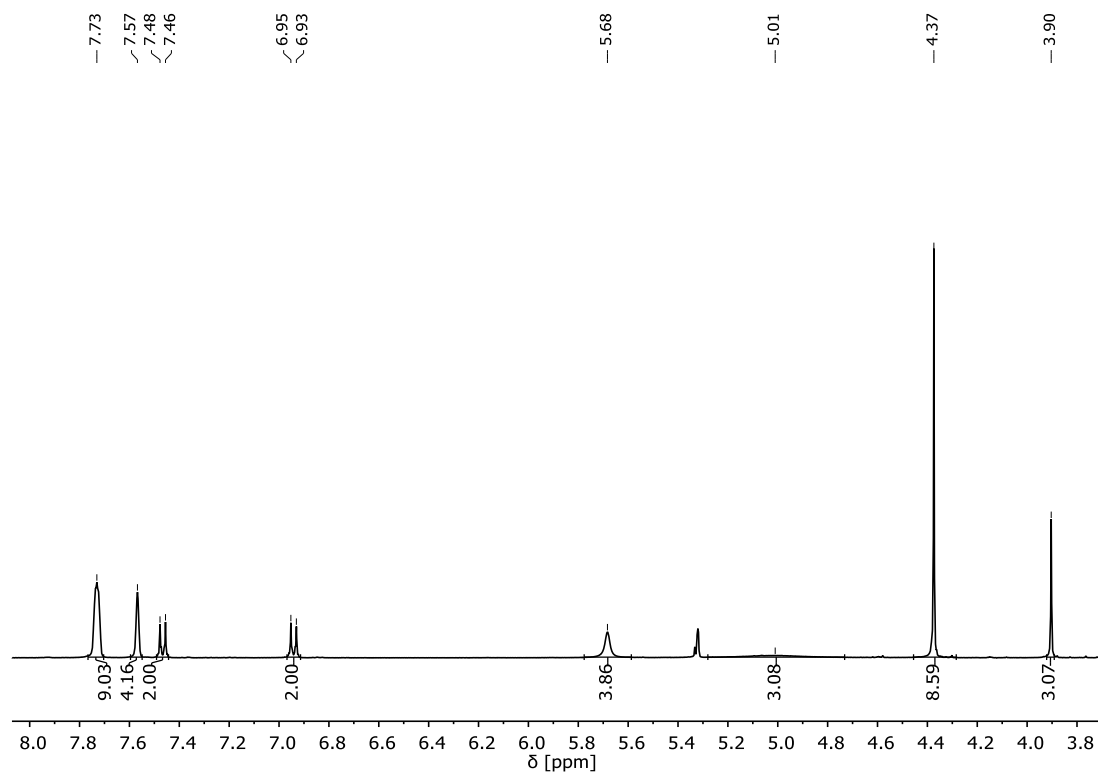

Figure S14:  $^1\text{H-NMR}$  spectrum of  $1^+ \text{BARF}_{24}^-$  ( $\text{CD}_2\text{Cl}_2$ , 400 MHz).

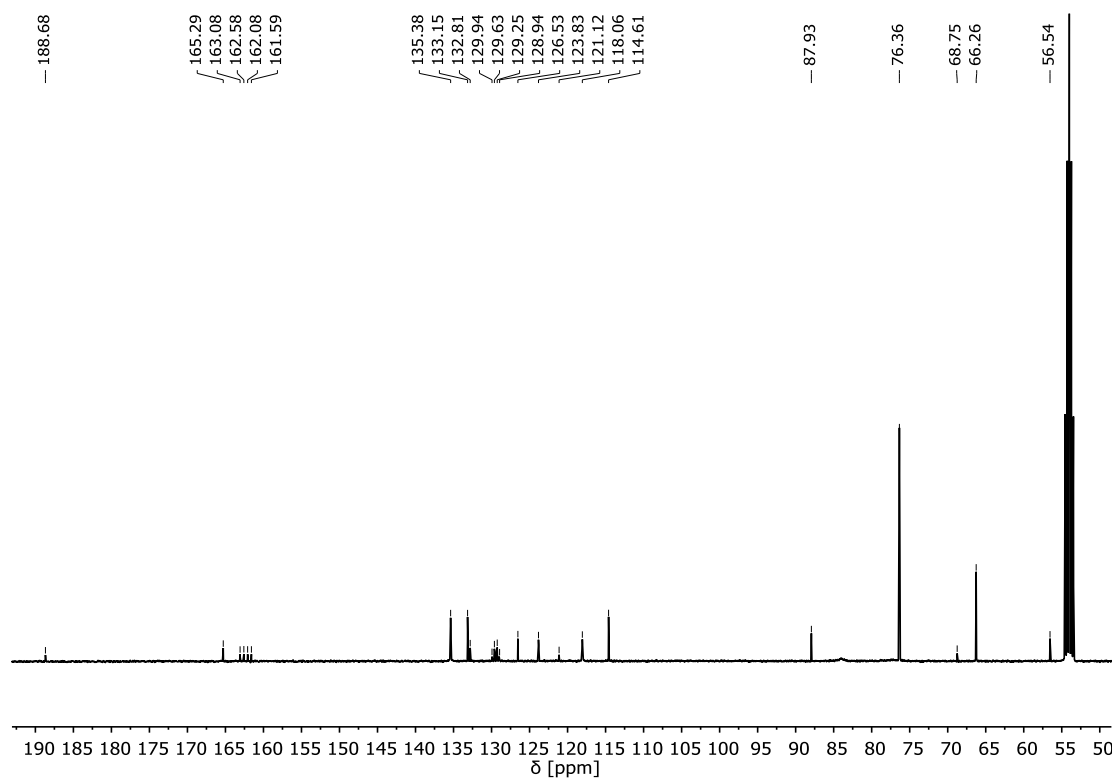

Figure S15:  $^{13}\text{C-NMR}$  spectrum of  $1^+ \text{BARF}_{24}^-$  ( $\text{CD}_2\text{Cl}_2$ , 400 MHz).

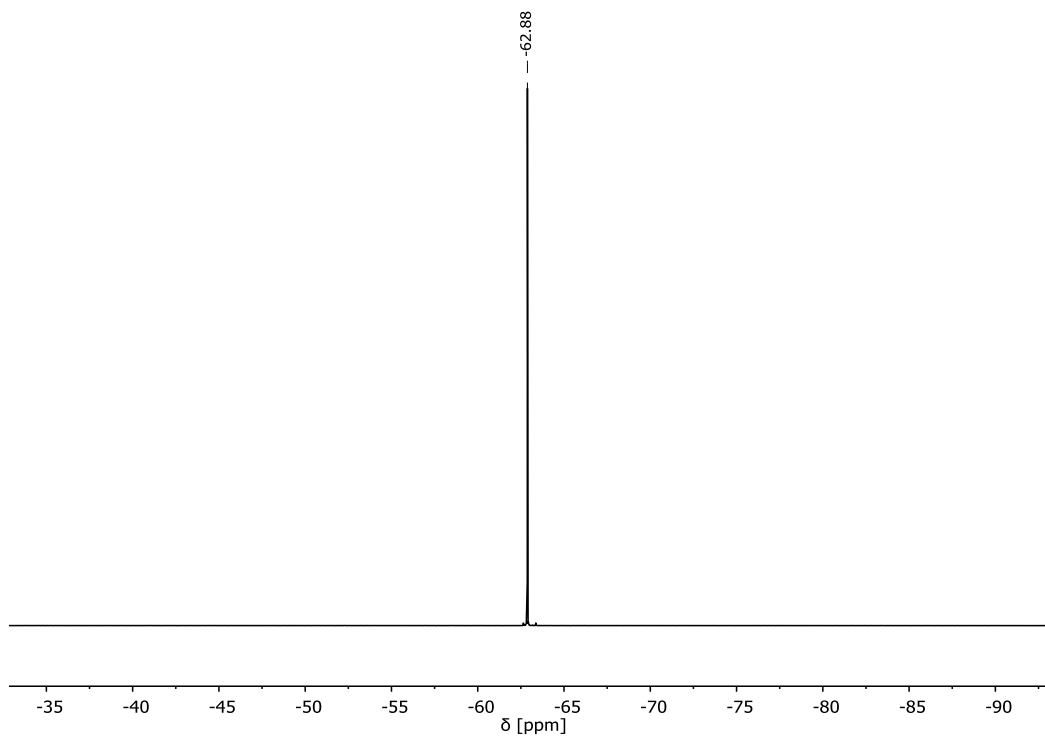

Figure S16:  $^{19}\text{F}$ -NMR spectrum of  $1^+ \text{BARF}_{24}^-$  ( $\text{CD}_2\text{Cl}_2$ , 400 MHz).

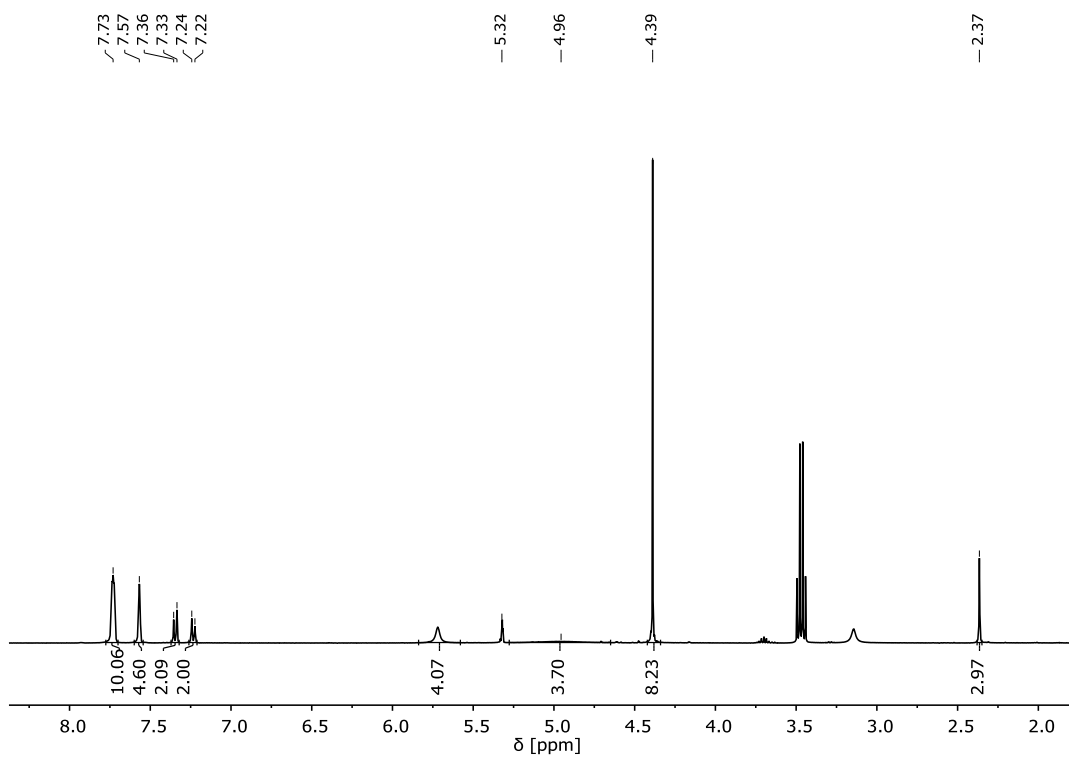

Figure S17:  $^1\text{H}$ -NMR spectrum of  $2^+ \text{BARF}_{24}^-$  ( $\text{CD}_2\text{Cl}_2$ , 400 MHz).

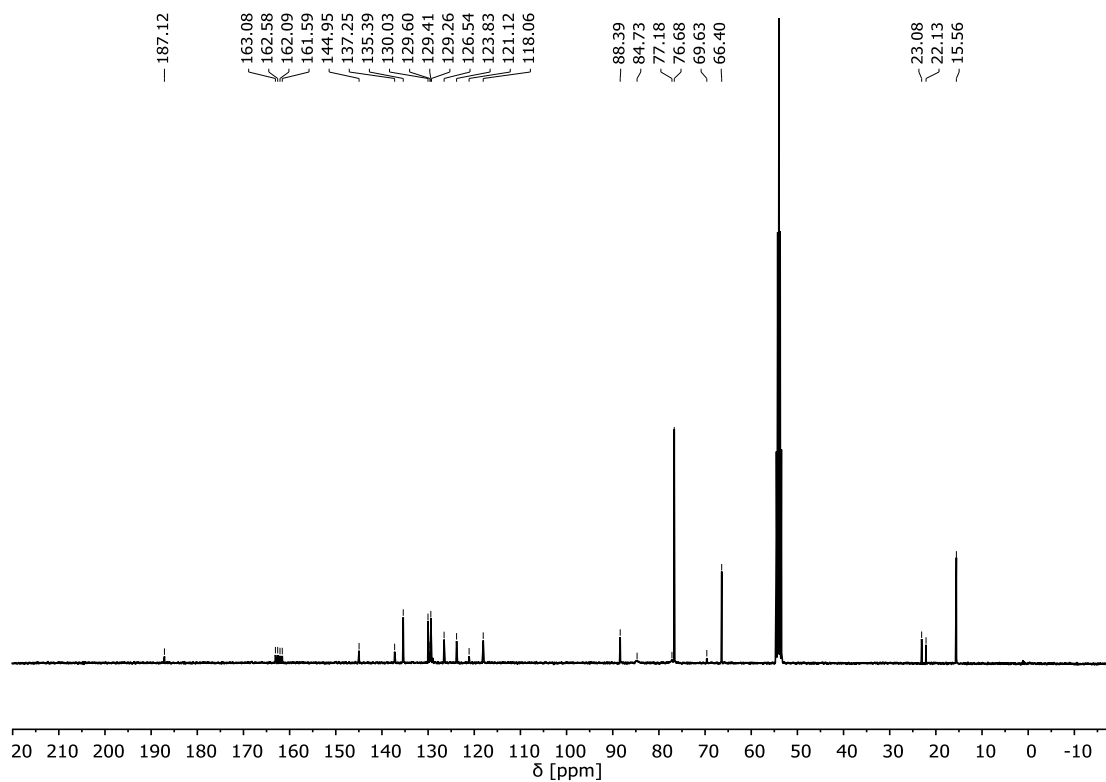

Figure S18:  $^{13}\text{C}$ -NMR spectrum of  $2^+ \text{BARF}_{24}^-$  ( $\text{CD}_2\text{Cl}_2$ , 400 MHz).

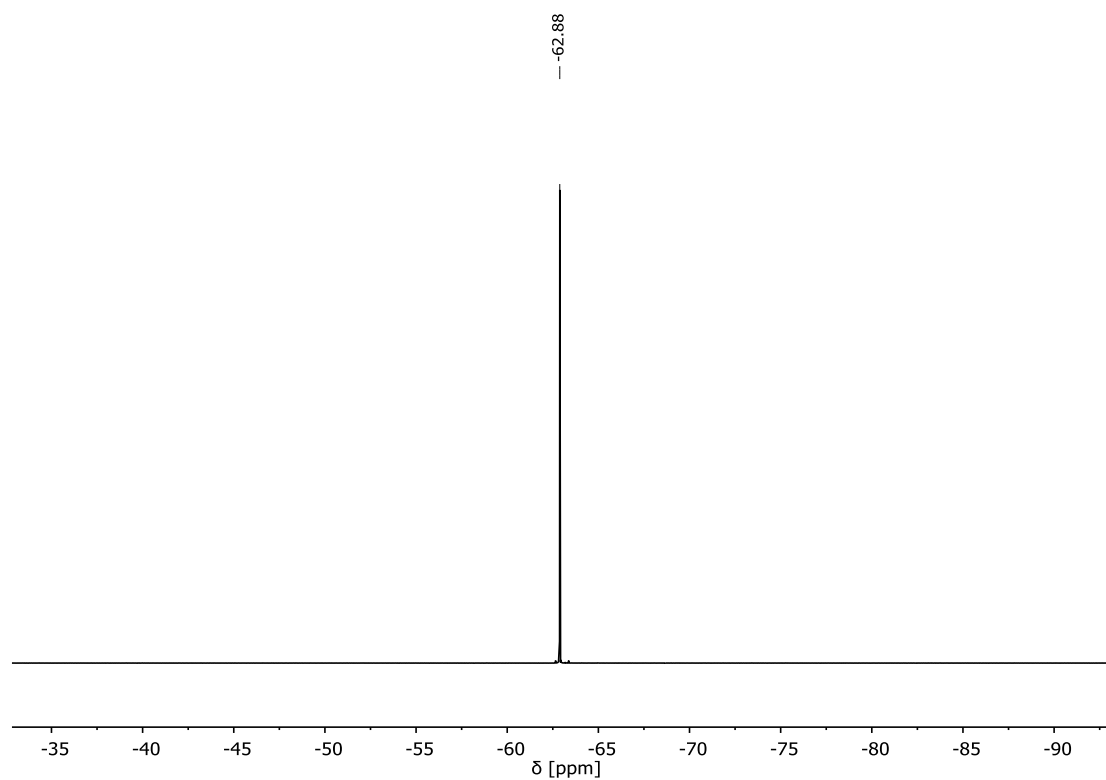

Figure S19:  $^{19}\text{F}$ -NMR spectrum of  $2^+ \text{BARF}_{24}^-$  ( $\text{CD}_2\text{Cl}_2$ , 400 MHz).

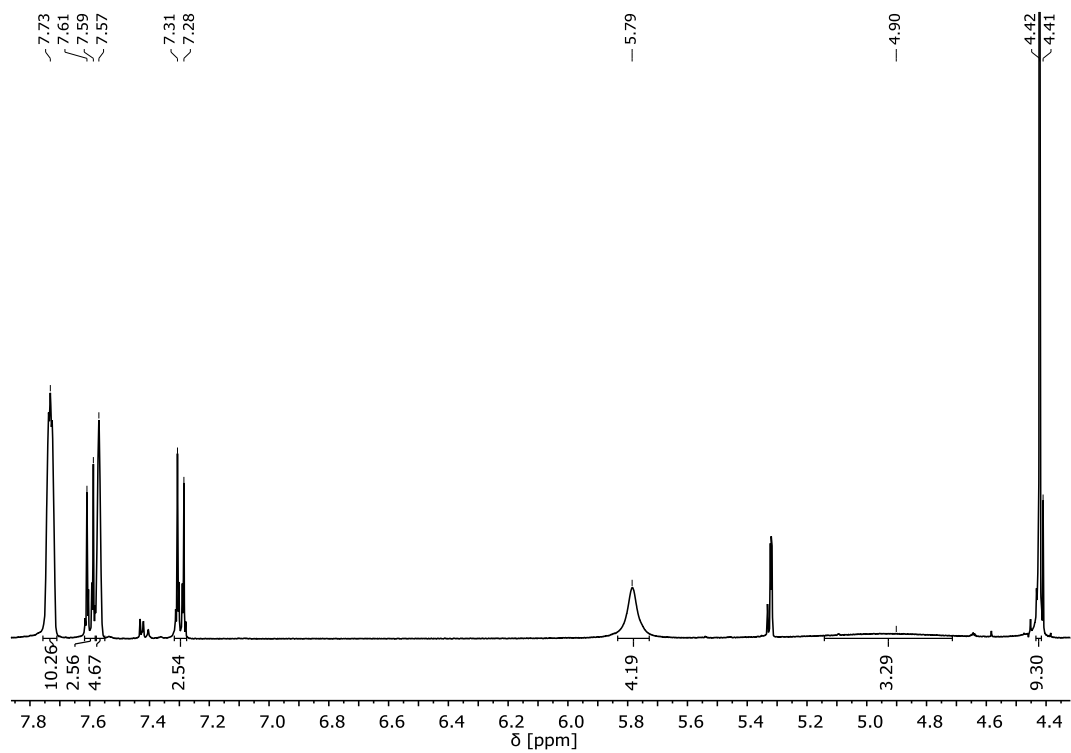

Figure S20:  $^1\text{H}$ -NMR spectrum of  $3^+ \text{BAr}^{\text{F}}_{24}^-$  ( $\text{CD}_2\text{Cl}_2$ , 400 MHz).

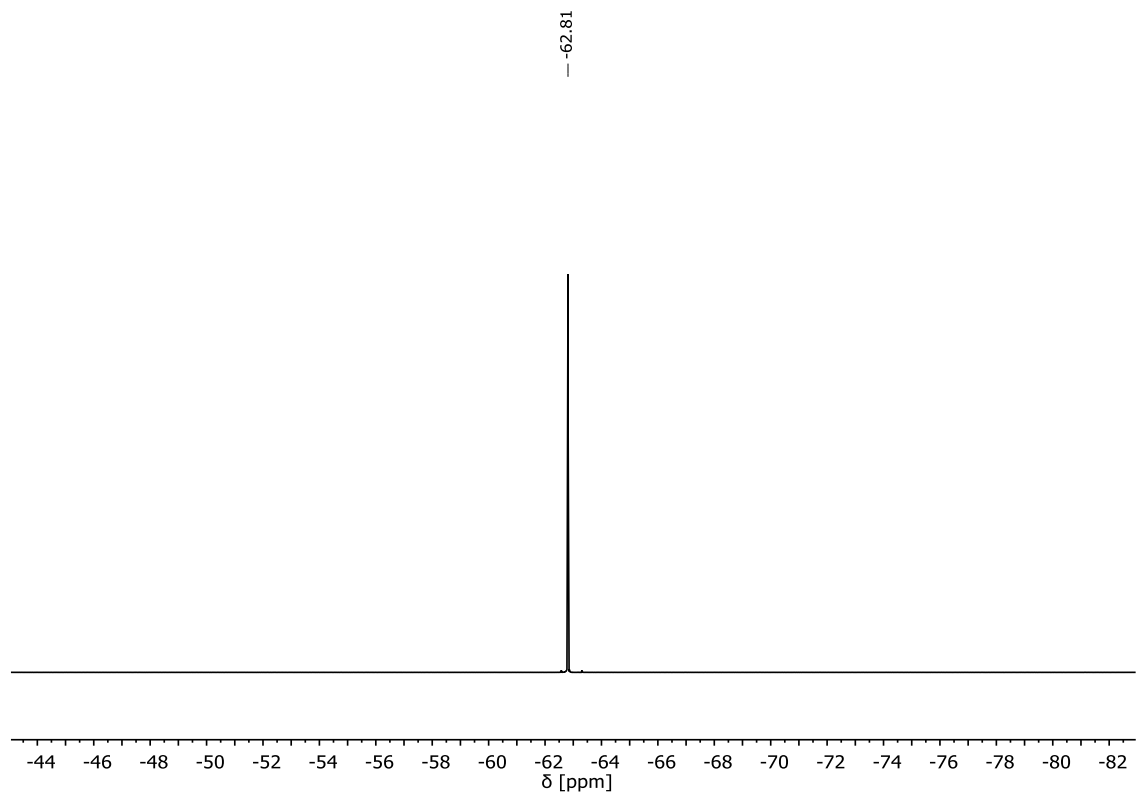

Figure S21:  $^{19}\text{F}$ -NMR spectrum of  $3^+ \text{BAr}^{\text{F}}_{24}^-$  ( $\text{CD}_2\text{Cl}_2$ , 400 MHz).

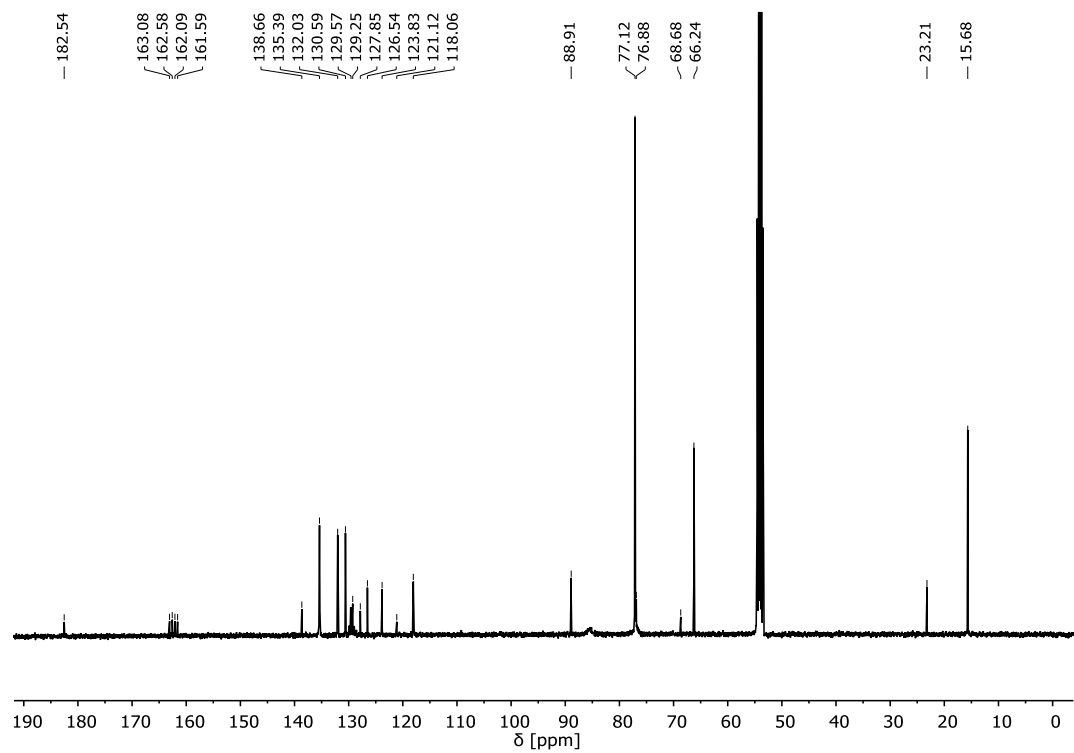

Figure S22:  $^{13}\text{C}$ -NMR spectrum of  $3^+ \text{BARF}_{24}^-$  ( $\text{CD}_2\text{Cl}_2$ , 400 MHz).

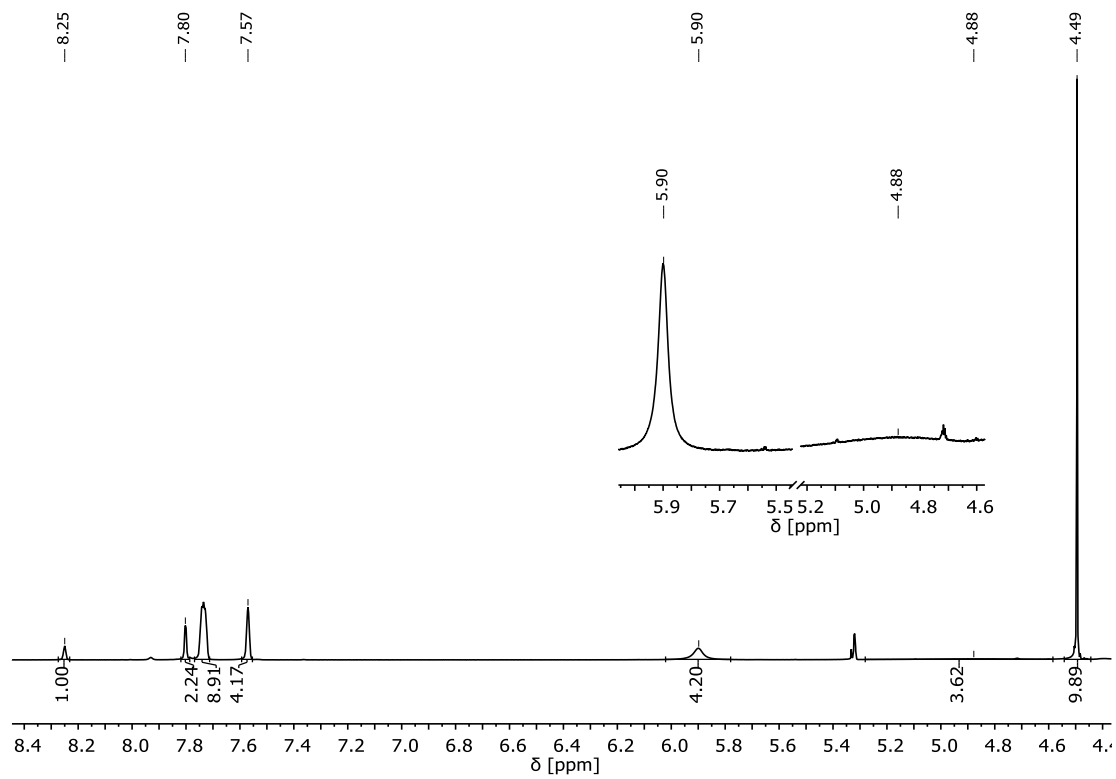

Figure S23:  $^1\text{H}$ -NMR spectrum of  $4^+ \text{BARF}_{24}^-$  ( $\text{CD}_2\text{Cl}_2$ , 400 MHz).

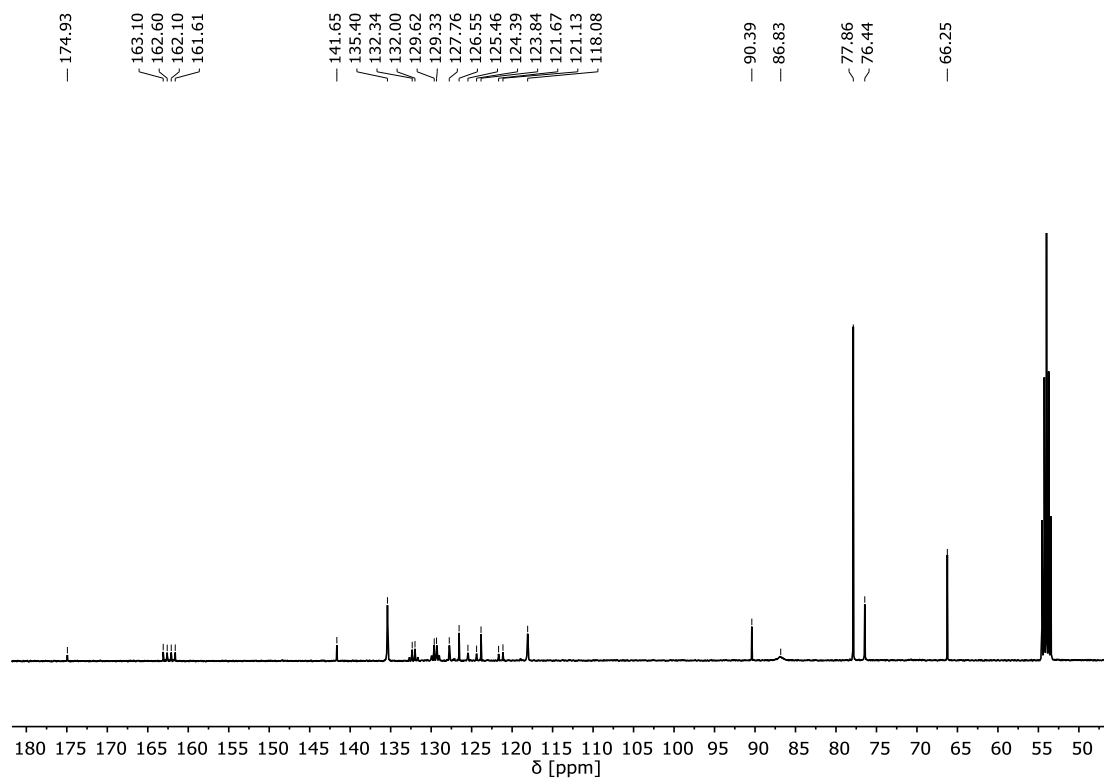

Figure S24:  $^{13}\text{C}$ -NMR spectrum of  $4^+ \text{BARF}_{24}^-$  ( $\text{CD}_2\text{Cl}_2$ , 400 MHz).

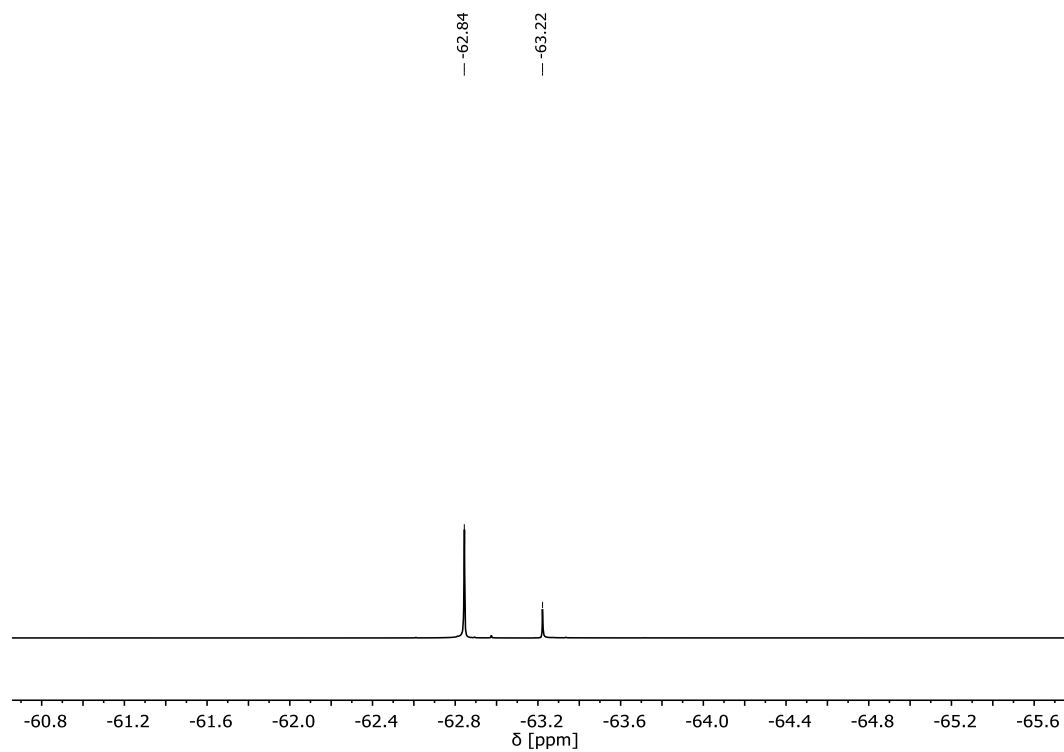

Figure S25:  $^{19}\text{F}$ -NMR spectrum of  $4^+ \text{BARF}_{24}^-$  ( $\text{CD}_2\text{Cl}_2$ , 400 MHz).

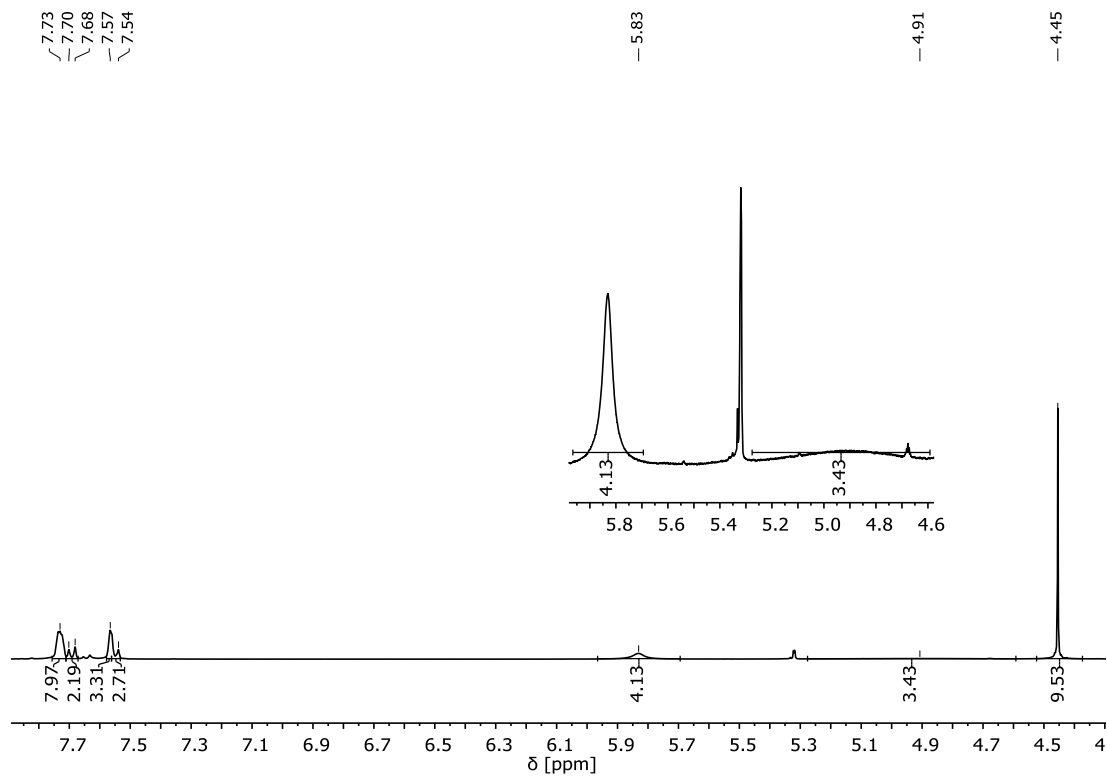

Figure S26:  $^1\text{H-NMR}$  spectrum of  $5^+ \text{BAr}^{\text{F}}_{24}^-$  ( $\text{CD}_2\text{Cl}_2$ , 400 MHz).

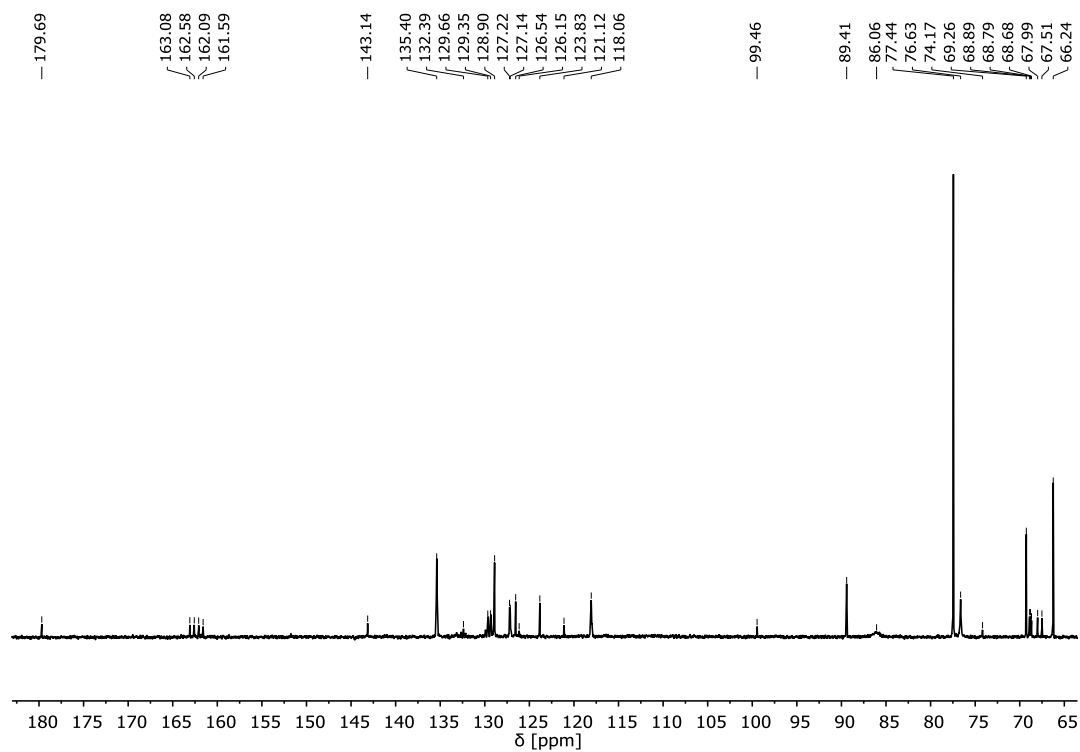

Figure S27:  $^{13}\text{C-NMR}$  spectrum of  $5^+ \text{BAr}^{\text{F}}_{24}^-$  ( $\text{CD}_2\text{Cl}_2$ , 400 MHz).





## Mass Spectrometry

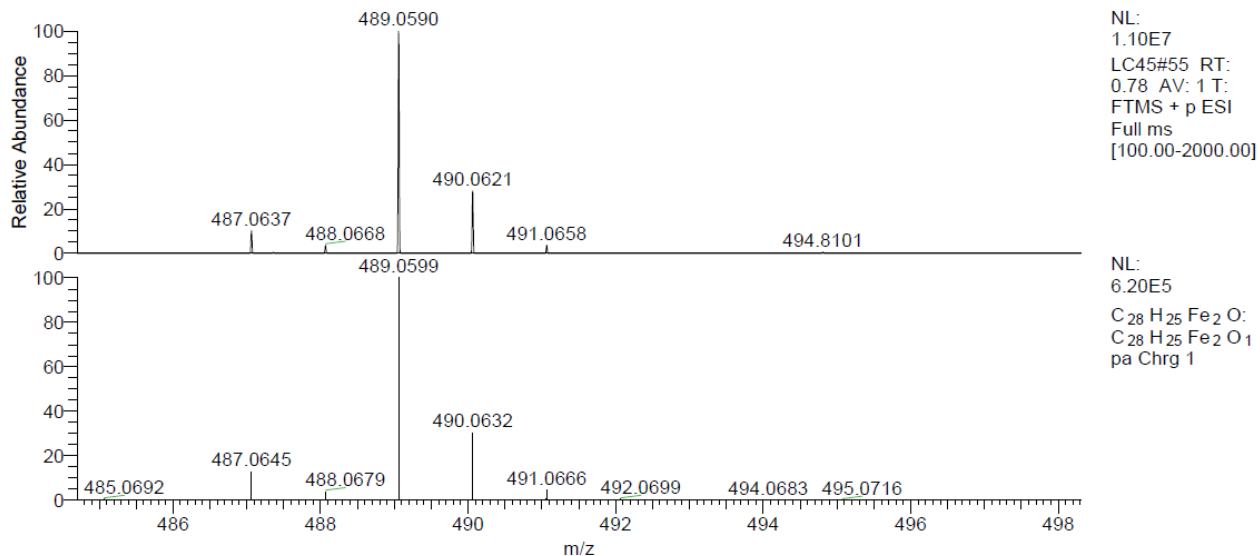

Figure S29: ESI-mass spectrum of  $1^+$  (experimental on the top, simulation at the bottom).

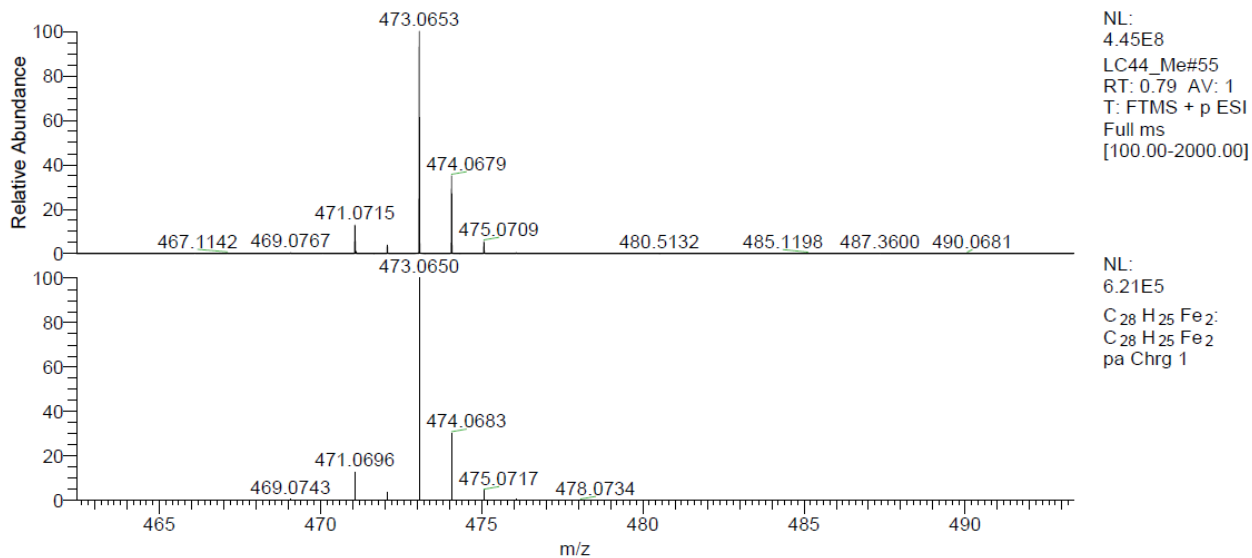

Figure S30: ESI-mass spectrum of  $2^+$  (experimental on the top, simulation at the bottom).

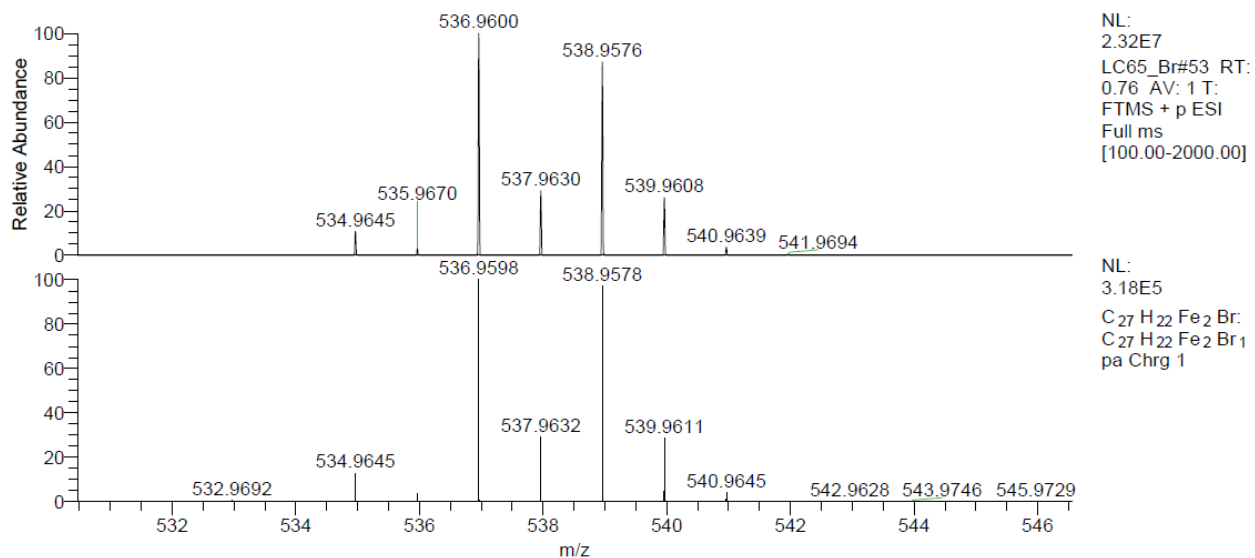

Figure S31: ESI-mass spectrum of  $3^+$  (experimental on the top, simulation at the bottom).

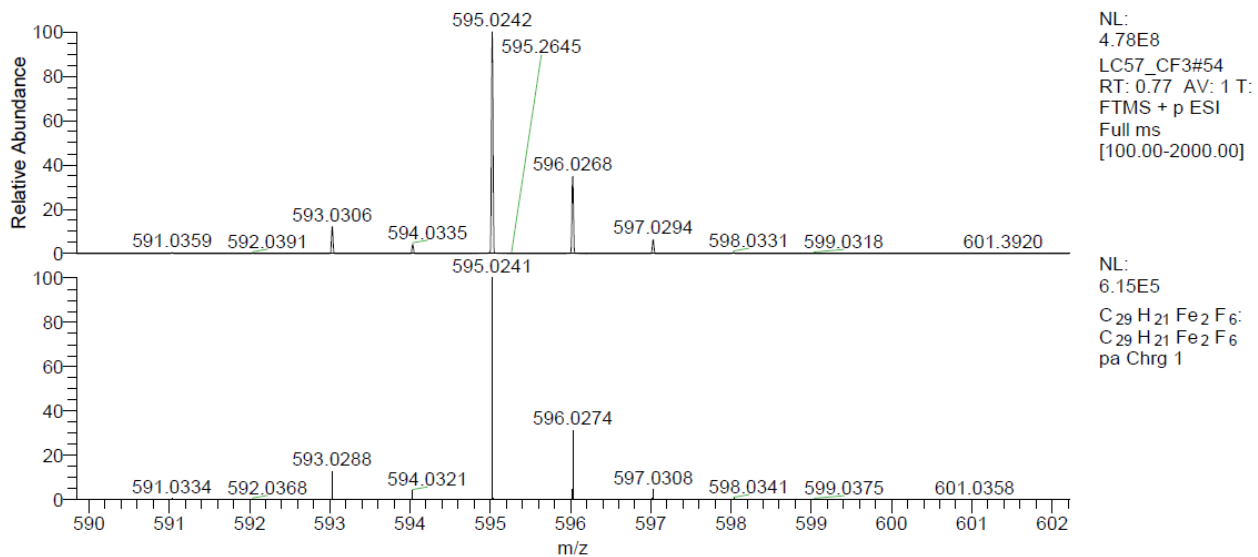

Figure S32: ESI-mass spectrum of  $4^+$  (experimental on the top, simulation at the bottom).

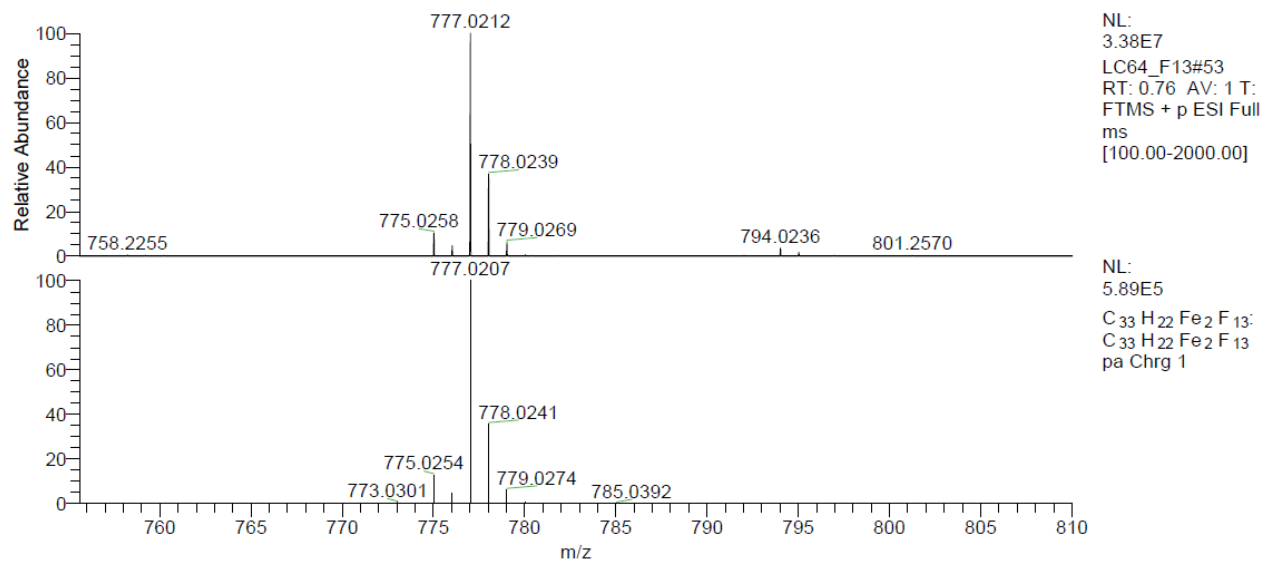

Figure S33: ESI-mass spectrum of  $5^+$  (experimental on the top, simulation at the bottom).

## Hammett Plots: Part I

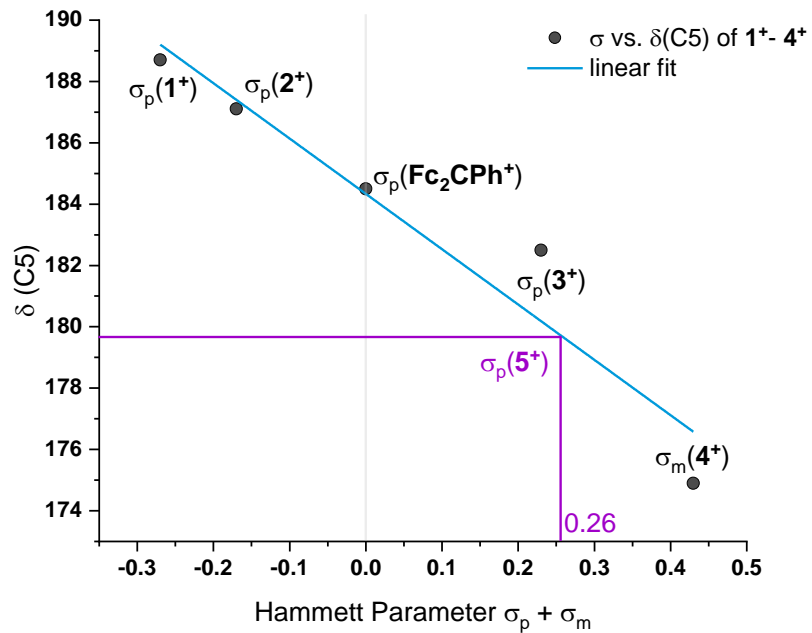

Figure S34: Hammett plot for the chemical shifts of the resonance signal of the methylium carbon atom C5;  $\sigma_p$  ( $\text{C}_6\text{F}_{13}$ ) is here approximated by the pink lines to +0.26 [ $\pm 0.06$ ].

### T-dependent NMR spectroscopy

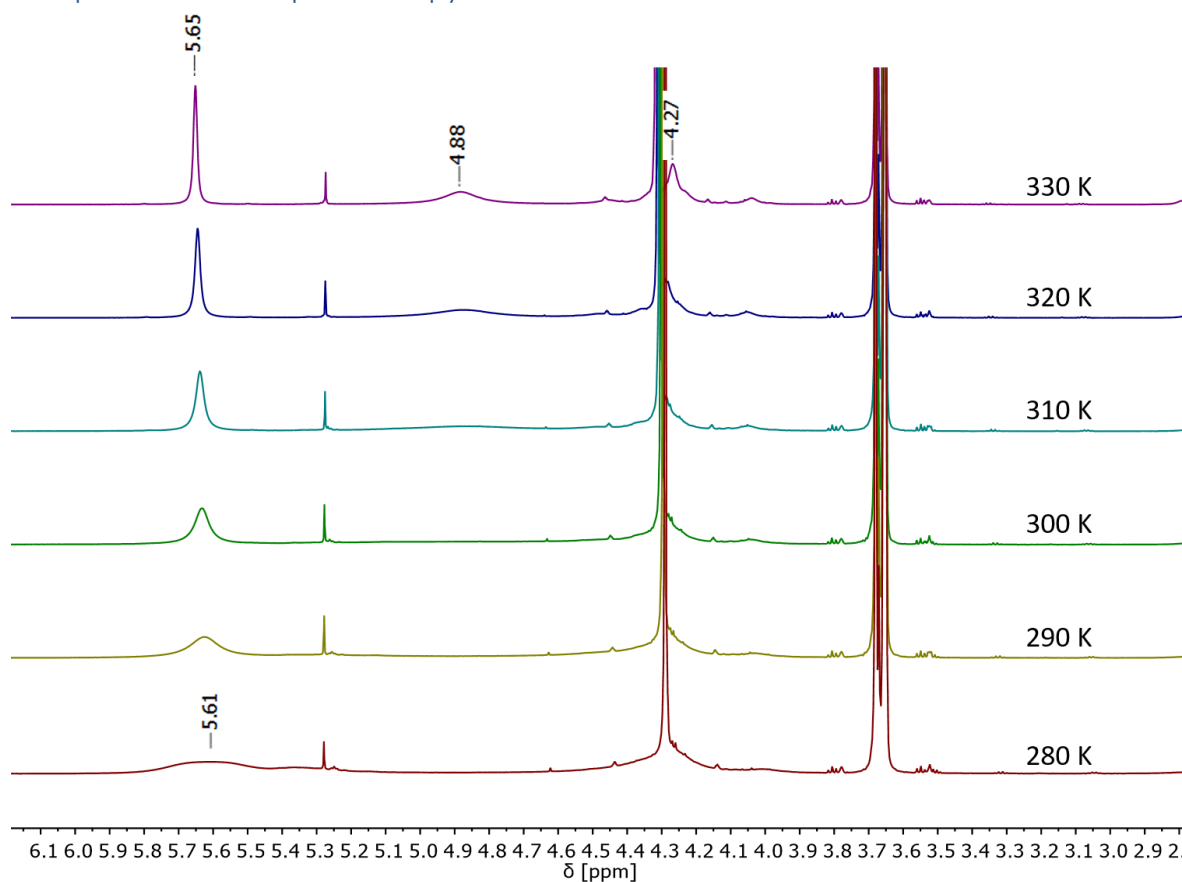

Figure S35: <sup>1</sup>H-NMR spectrum of **2**<sup>+</sup> BARF<sub>24</sub><sup>-</sup> between 3 and 6 ppm at different temperatures between 280 K and 330 K (1,2-C<sub>2</sub>D<sub>4</sub>Cl<sub>2</sub>, 600 MHz).

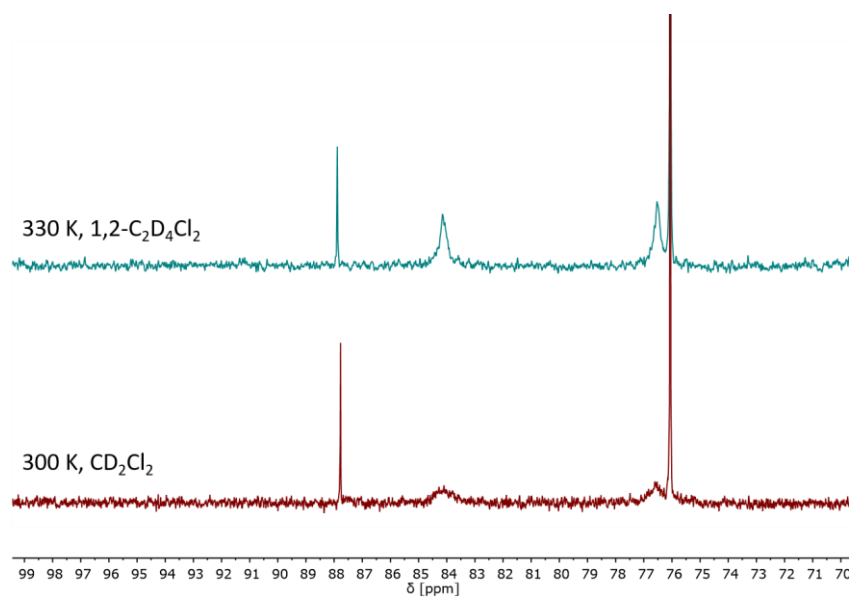

Figure S36: <sup>13</sup>C-NMR spectrum of **2**<sup>+</sup> BARF<sub>24</sub><sup>-</sup> at 300 K and 330 K in spectral range of the ferrocenyl C atoms (1,2-C<sub>2</sub>D<sub>4</sub>Cl<sub>2</sub>, 600 MHz and CD<sub>2</sub>Cl<sub>2</sub>, 400 MHz).

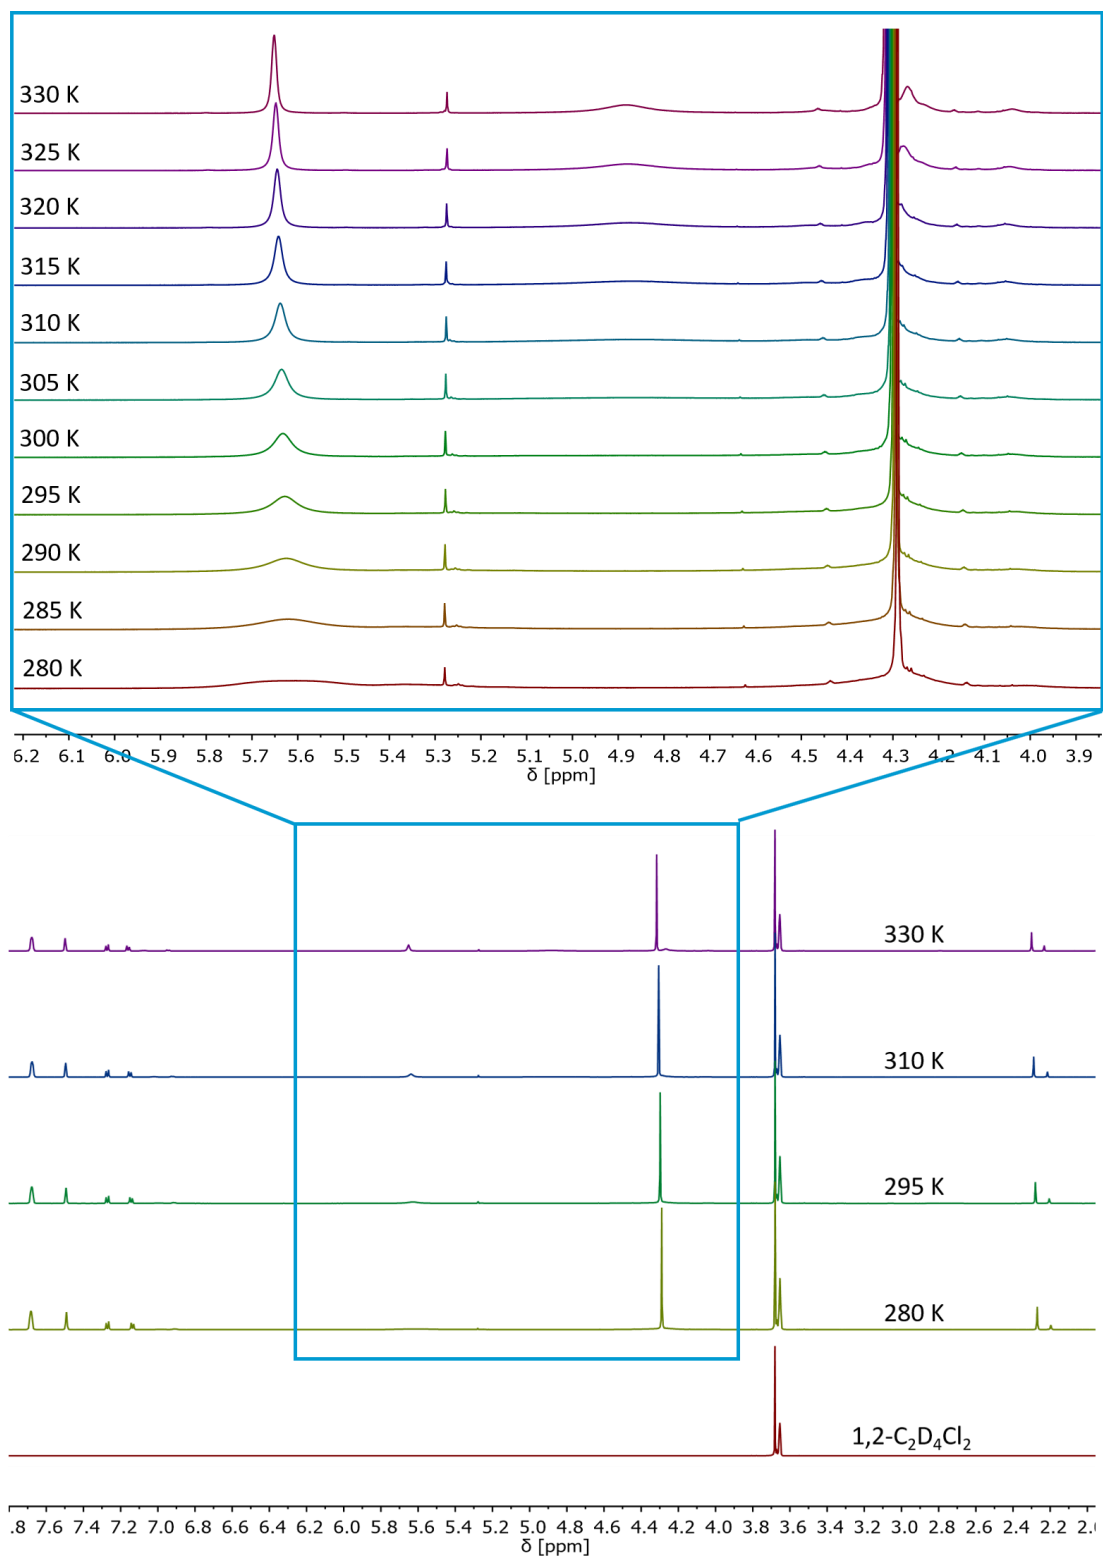

Figure S37:  $^1\text{H-NMR}$  spectrum of  $2^+ \text{BARF}_{24}^-$  at different temperatures between 280 K and 330 K with zoom into the ferrocenyl region at the top ( $1,2\text{-C}_2\text{D}_4\text{Cl}_2$ , 600 MHz).

## XRD- Crystal Data

Table S1: Comparison of the crystal data of carbinols **1-OH** to **5-OH**.

|                                           | <b>1-OH</b>                                       | <b>2-OH</b>                                  | <b>3-OH</b>                                  | <b>4-OH</b>                                       | <b>5-OH</b>                                      |
|-------------------------------------------|---------------------------------------------------|----------------------------------------------|----------------------------------------------|---------------------------------------------------|--------------------------------------------------|
| Crystal System,<br>Space Group            | triclinic,<br>$P\bar{1}$                          | triclinic,<br>$P\bar{1}$                     | monoclinic,<br>$P2_1/c$                      | orthorhombic,<br>$Fdd2$                           | orthorhombic,<br>$Fdd2$                          |
| Angle (CpFe1-CpFe1)                       | 3.34°                                             | 2.41°                                        | 3.91°                                        | 4.00                                              | 4.59°                                            |
| Angle (CpFe2-CpFe2)                       | 4.47°                                             | 4.56°                                        | 3.52°                                        | 2.35                                              | 2.22°                                            |
| Angle<br>(CpFe1Cp-CpFe2Cp)                | 111.05(13)°                                       | 109.99(13)°                                  | 109.76(2)°                                   | 109.40(2)°                                        | 109.35(2)°                                       |
| Angle<br>(CpFe1Cp-Ph)                     | 108.20(14)°                                       | 109.03(13)°                                  | 109.85(18)°                                  | 108.87(2)°                                        | 109.80(2)°                                       |
| Angle<br>(CpFe2Cp-Ph)                     | 110.17(14)°                                       | 109.48(13)°                                  | 109.33(2)°                                   | 110.87(2)°                                        | 110.04(2)°                                       |
| d(C-OH) <sup>[a]</sup>                    | 1.442(2)                                          | 1.437(2)                                     | 1.436(3)                                     | 1.433(3)                                          | 1.436(4)                                         |
| d(C-Ph) <sup>[a]</sup>                    | 1.538(3)                                          | 1.541(2)                                     | 1.532(3)                                     | 1.522(4)                                          | 1.532(4)                                         |
| d(C-CpFe1) <sup>[a]</sup>                 | 1.517(2)                                          | 1.517(2)                                     | 1.512(3)                                     | 1.520(4)                                          | 1.514(4)                                         |
| d(C-CpFe2) <sup>[a]</sup>                 | 1.512(2)                                          | 1.517(2)                                     | 1.520(4)                                     | 1.509(4)                                          | 1.524(4)                                         |
| d <sub>top</sub> Cp-Fe1 <sup>[a]</sup>    | 1.646                                             | 1.648                                        | 1.650                                        | 1.658                                             | 1.649                                            |
| d <sub>bottom</sub> Cp-Fe1 <sup>[a]</sup> | 1.649                                             | 1.649                                        | 1.655                                        | 1.659                                             | 1.653                                            |
| d <sub>top</sub> Cp-Fe2 <sup>[a]</sup>    | 1.647                                             | 1.650                                        | 1.650                                        | 1.648                                             | 1.646                                            |
| d <sub>bottom</sub> Cp-Fe2 <sup>[a]</sup> | 1.653                                             | 1.655                                        | 1.651                                        | 1.657                                             | 1.652                                            |
| Fe1                                       | -10.09°, -9.71°,<br>-9.71°, -9.92°,<br>-9.00°     | -5.79°, -5.87°,<br>-5.99°, -6.23°,<br>-5.72° | -5.49°, -5.35°,<br>-5.37°, -5.44°,<br>-5.07° | -1.15°, -1.12°,<br>-0.85°, -0.87°,<br>-0.11       | -10.98, -11.04°,<br>-10.64°, -10.93°,<br>-10.29° |
| Fe2                                       | -13.28°, -12.73°,<br>-13.42°, -13.18°,<br>-11.61° | -8.59°, -8.82°,<br>-8.86°, -8.90°,<br>-8.24° | -6.04°, -6.12°,<br>-6.14°, -6.11°,<br>-5.67° | -23.73°, -23.73°,<br>-23.73°, -23.72°,<br>-23.25° | -21.79, -21.70,<br>-21.65, -21.96,<br>-20.37°    |

[a] Distances d in Å.

Crystal data and structure refinement for **1-OH**.

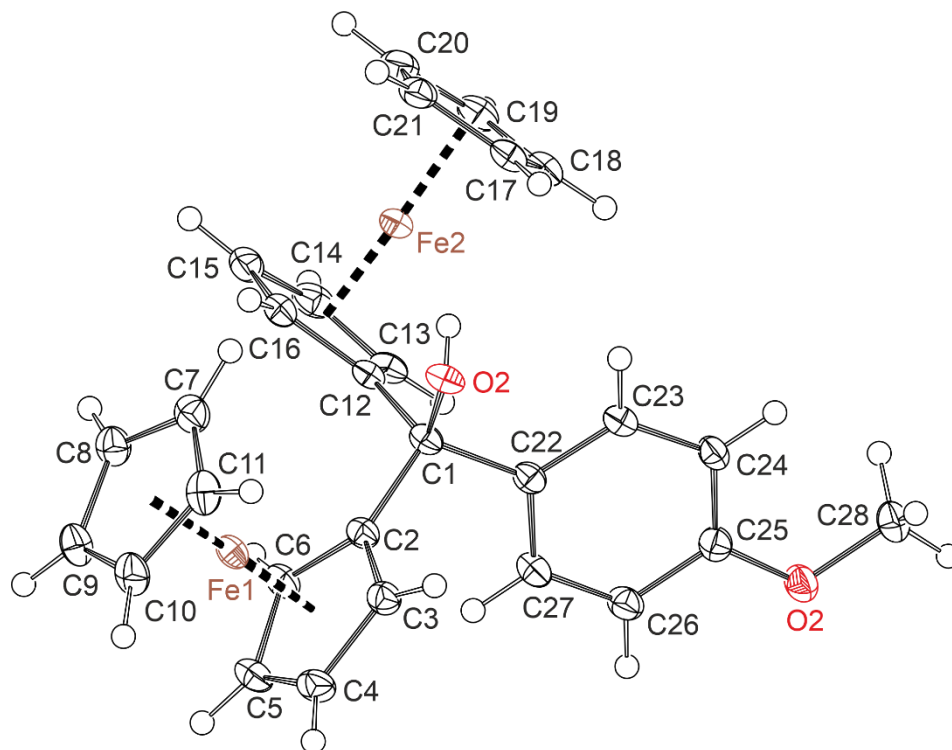

Figure S38: Perspective view of one of the independent molecules in the unit cell of complex **1-OH**. The ellipsoids are displayed at a 50% probability level.



Table S2: Structure solution and refinement data for **1-OH**.

|                                                |                                                                |
|------------------------------------------------|----------------------------------------------------------------|
| Empirical formula                              | C <sub>28</sub> H <sub>26</sub> O <sub>2</sub> Fe <sub>2</sub> |
| Formula weight                                 | 506.19                                                         |
| Temperature/K                                  | 100.15                                                         |
| Crystal system                                 | triclinic                                                      |
| Space group                                    | $P\bar{1}$                                                     |
| a/Å                                            | 9.2870(9)                                                      |
| b/Å                                            | 10.1320(11)                                                    |
| c/Å                                            | 12.9067(16)                                                    |
| $\alpha/^\circ$                                | 112.121(9)                                                     |
| $\beta/^\circ$                                 | 96.839(9)                                                      |
| $\gamma/^\circ$                                | 101.771(8)                                                     |
| Volume/Å <sup>3</sup>                          | 1075.4(2)                                                      |
| Z                                              | 2                                                              |
| $\rho_{\text{calc}}/\text{cm}^3$               | 1.563                                                          |
| $\mu/\text{mm}^{-1}$                           | 1.373                                                          |
| F(000)                                         | 524.0                                                          |
| Crystal size/mm <sup>3</sup>                   | 0.5 × 0.277 × 0.08                                             |
| Radiation                                      | MoK $\alpha$ ( $\lambda = 0.71073$ )                           |
| 2 $\theta$ range for data collection/ $^\circ$ | 4.418 to 53.47                                                 |
| Index ranges                                   | -11 ≤ h ≤ 11, -12 ≤ k ≤ 12, -16 ≤ l ≤ 16                       |
| Reflections collected                          | 15773                                                          |
| Independent reflections                        | 4548 [R <sub>int</sub> = 0.0824, R <sub>sigma</sub> = 0.0497]  |
| Data/restraints/parameters                     | 4548/0/293                                                     |
| Goodness-of-fit on F <sup>2</sup>              | 1.038                                                          |
| Final R indexes [ $ I  \geq 2\sigma(I)$ ]      | R <sub>1</sub> = 0.0317, wR <sub>2</sub> = 0.0782              |
| Final R indexes [all data]                     | R <sub>1</sub> = 0.0342, wR <sub>2</sub> = 0.0795              |

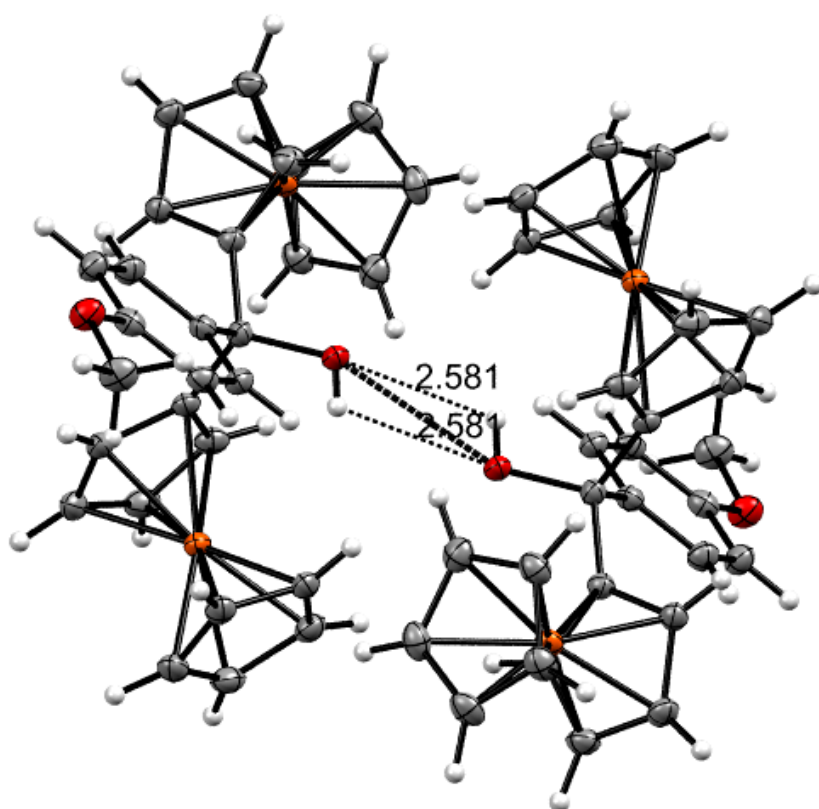

Figure S39: Perspective view of hydrogen bonded dimers of complex **1-OH**. The ellipsoids are displayed at a 50% probability level.

Crystal data and structure refinement for **2-OH**.

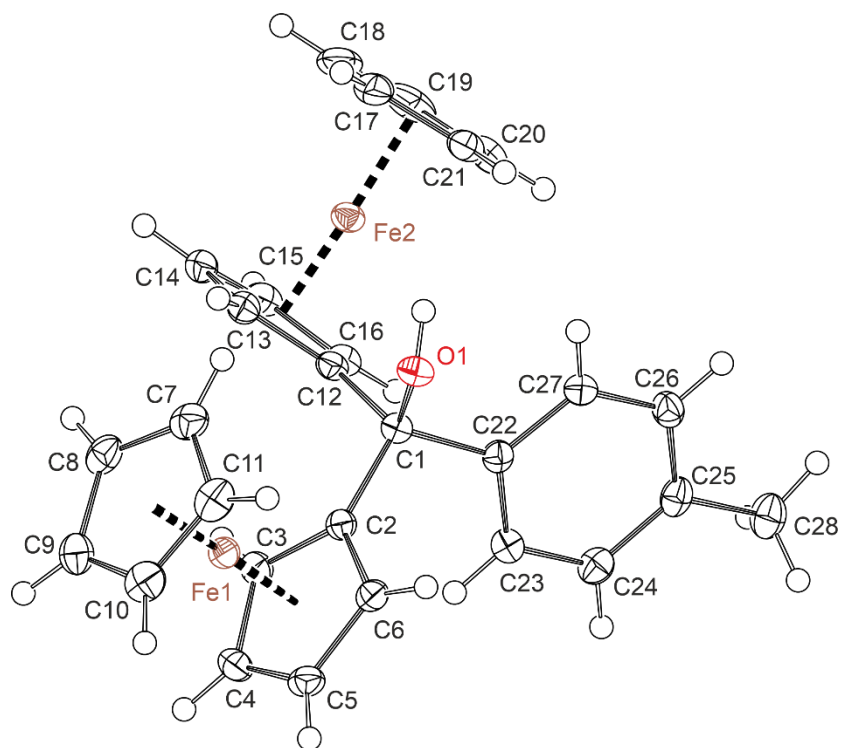

Figure S40: Perspective view of one of the independent molecules in the unit cell of complex **2-OH**. The ellipsoids are displayed at a 50% probability level.

Table S3: Structure solution and refinement data for **2-OH**.

|                                             |                                                               |
|---------------------------------------------|---------------------------------------------------------------|
| Empirical formula                           | C <sub>28</sub> H <sub>26</sub> Fe <sub>2</sub> O             |
| Formula weight                              | 490.19                                                        |
| Temperature/K                               | 100(2)                                                        |
| Crystal system                              | triclinic                                                     |
| Space group                                 | $P\bar{1}$                                                    |
| a/Å                                         | 8.992(3)                                                      |
| b/Å                                         | 10.149(3)                                                     |
| c/Å                                         | 12.791(4)                                                     |
| α/°                                         | 77.41(2)                                                      |
| β/°                                         | 69.79(2)                                                      |
| γ/°                                         | 86.91(2)                                                      |
| Volume/Å <sup>3</sup>                       | 1068.8(6)                                                     |
| Z                                           | 2                                                             |
| ρ <sub>calc</sub> /cm <sup>3</sup>          | 1.523                                                         |
| μ/mm <sup>-1</sup>                          | 1.376                                                         |
| F(000)                                      | 508.0                                                         |
| Crystal size/mm <sup>3</sup>                | 0.3 × 0.2 × 0.1                                               |
| Radiation                                   | MoKα (λ = 0.71073)                                            |
| 2θ range for data collection/°              | 4.786 to 53.698                                               |
| Index ranges                                | -11 ≤ h ≤ 11, -12 ≤ k ≤ 12, -16 ≤ l ≤ 16                      |
| Reflections collected                       | 12543                                                         |
| Independent reflections                     | 4508 [R <sub>int</sub> = 0.0184, R <sub>sigma</sub> = 0.0150] |
| Data/restraints/parameters                  | 4508/0/282                                                    |
| Goodness-of-fit on F <sup>2</sup>           | 1.029                                                         |
| Final R indexes [I >= 2σ (I)]               | R <sub>1</sub> = 0.0256, wR <sub>2</sub> = 0.0655             |
| Final R indexes [all data]                  | R <sub>1</sub> = 0.0291, wR <sub>2</sub> = 0.0678             |
| Largest diff. peak/hole / e Å <sup>-3</sup> | 0.35/-0.44                                                    |

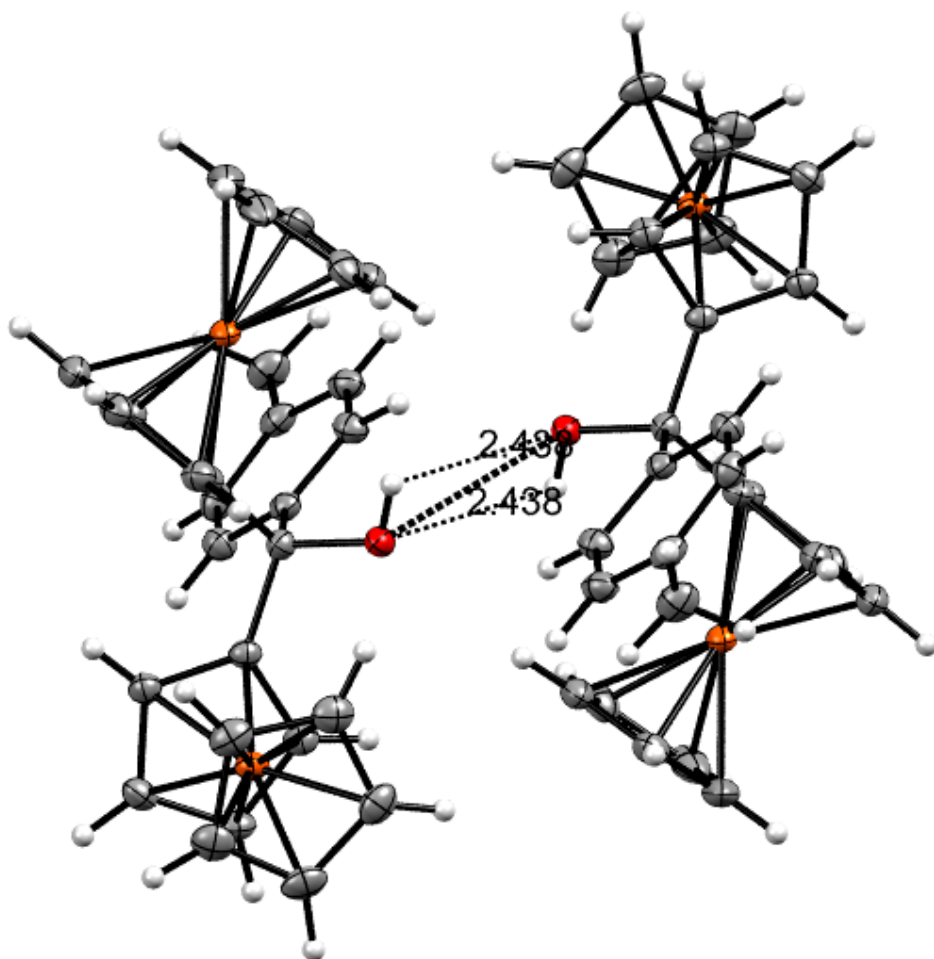

Figure S41: Perspective view of hydrogen bonded dimers of complex **2-OH**. The ellipsoids are displayed at a 50% probability level.

Crystal data and structure refinement for **3-OH**.

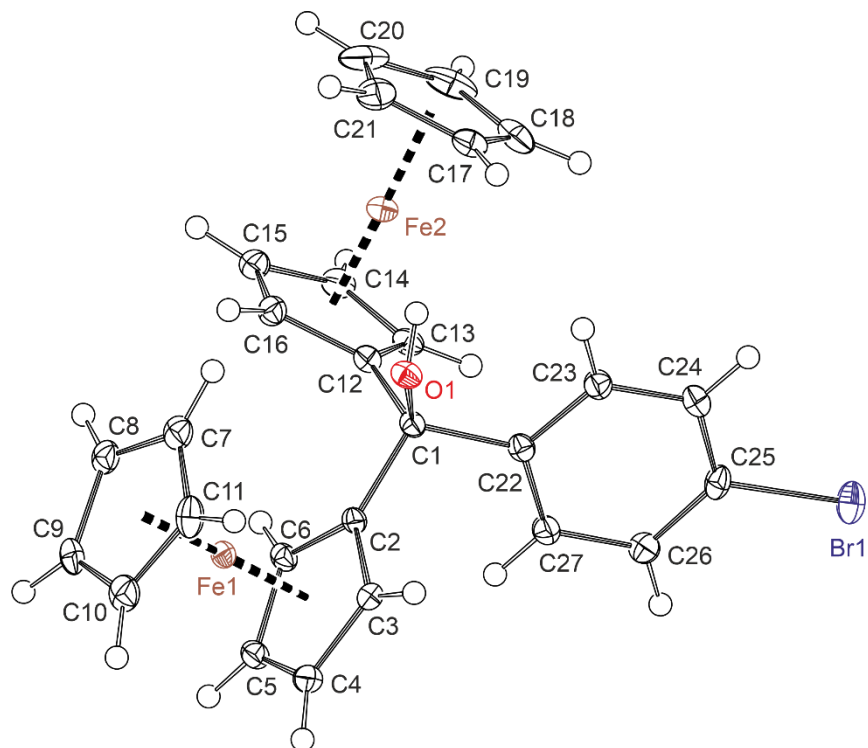

Figure S42: Perspective view of one of the independent molecules in the unit cell of complex **3-OH**. The ellipsoids are displayed at a 50% probability level.

Table S4: Structure solution and refinement data for **3-OH**.

|                                                              |                                                                              |
|--------------------------------------------------------------|------------------------------------------------------------------------------|
| Empirical formula                                            | C <sub>27</sub> H <sub>23</sub> BrFe <sub>2</sub> O                          |
| Formula weight                                               | 555.06                                                                       |
| Temperature/K                                                | 100(2)                                                                       |
| Crystal system                                               | monoclinic                                                                   |
| Space group                                                  | <i>P2<sub>1</sub>/c</i>                                                      |
| <i>a</i> /Å                                                  | 10.2087(3)                                                                   |
| <i>b</i> /Å                                                  | 22.3002(8)                                                                   |
| <i>c</i> /Å                                                  | 9.2773(2)                                                                    |
| $\alpha$ /°                                                  | 90                                                                           |
| $\beta$ /°                                                   | 92.140(2)                                                                    |
| $\gamma$ /°                                                  | 90                                                                           |
| Volume/Å <sup>3</sup>                                        | 2110.56(11)                                                                  |
| <i>Z</i>                                                     | 4                                                                            |
| $\rho_{\text{calc}}$ /cm <sup>3</sup>                        | 1.747                                                                        |
| $\mu$ /mm <sup>-1</sup>                                      | 3.286                                                                        |
| <i>F</i> (000)                                               | 1120.0                                                                       |
| Crystal size/mm <sup>3</sup>                                 | 0.3 × 0.2 × 0.1                                                              |
| Radiation                                                    | MoK $\alpha$ ( $\lambda$ = 0.71073)                                          |
| 2 $\theta$ range for data collection/°                       | 3.652 to 53.998                                                              |
| Index ranges                                                 | -13 ≤ <i>h</i> ≤ 12, -28 ≤ <i>k</i> ≤ 28, -11 ≤ <i>l</i> ≤ 9                 |
| Reflections collected                                        | 11459                                                                        |
| Independent reflections                                      | 4585 [ <i>R</i> <sub>int</sub> = 0.0240, <i>R</i> <sub>sigma</sub> = 0.0210] |
| Data/restraints/parameters                                   | 4585/0/282                                                                   |
| Goodness-of-fit on <i>F</i> <sup>2</sup>                     | 1.075                                                                        |
| Final <i>R</i> indexes [ <i>I</i> ≥ 2 $\sigma$ ( <i>I</i> )] | <i>R</i> <sub>1</sub> = 0.0315, <i>wR</i> <sub>2</sub> = 0.0775              |
| Final <i>R</i> indexes [all data]                            | <i>R</i> <sub>1</sub> = 0.0375, <i>wR</i> <sub>2</sub> = 0.0831              |
| Largest diff. peak/hole / e Å <sup>-3</sup>                  | 0.55/-0.84                                                                   |

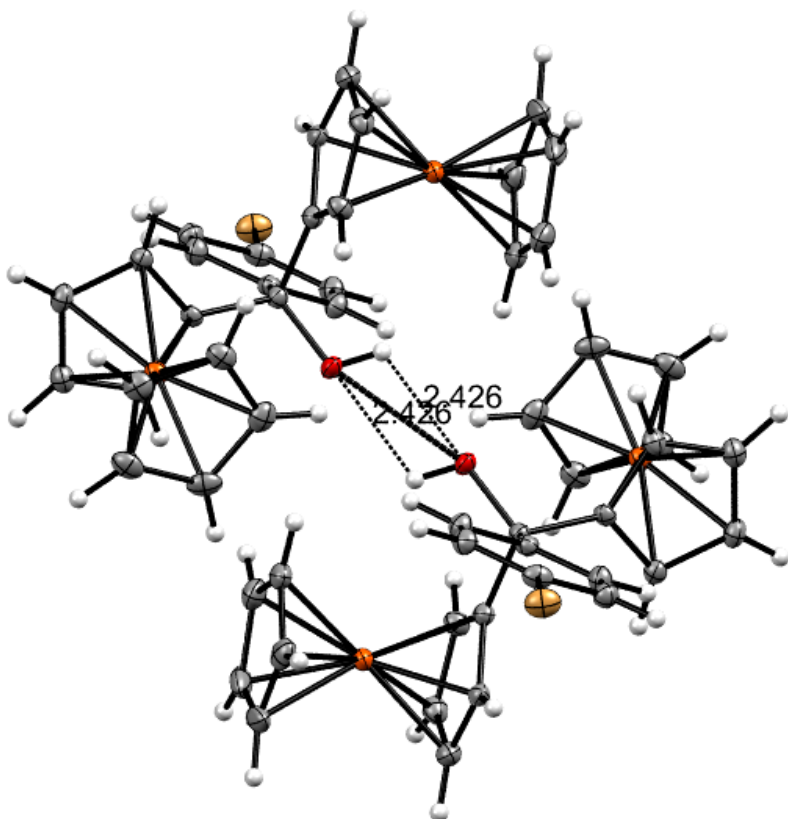

Figure S43: Perspective view of hydrogen bonded dimers of complex **3-OH**. The ellipsoids are displayed at a 50% probability level.



Crystal data and structure refinement for **4-OH**.

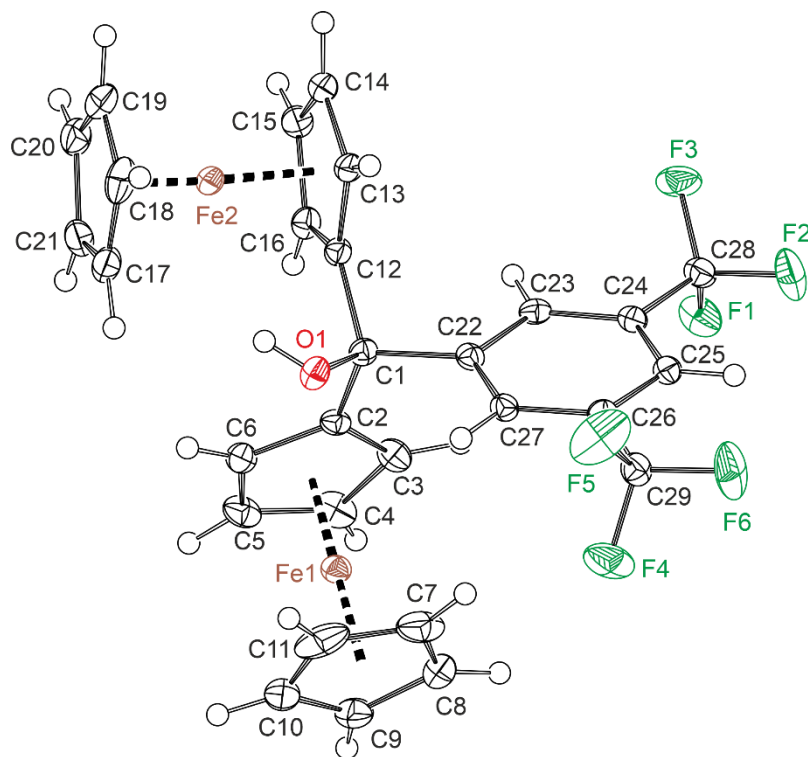

Figure S44: Perspective view of one of the independent molecules in the unit cell of complex **4-OH**. The ellipsoids are displayed at a 50% probability level.

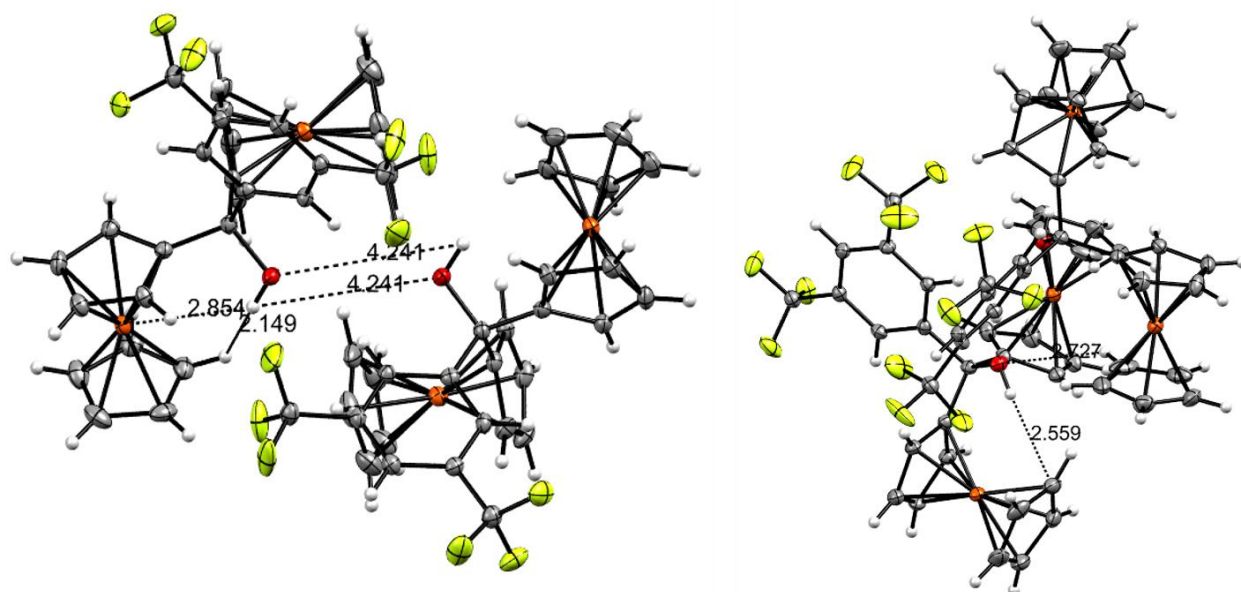

Figure S45: Perspective view of two molecules of complex **4-OH** lacking true hydrogen bonds. The ellipsoids are displayed at a 50% probability level.

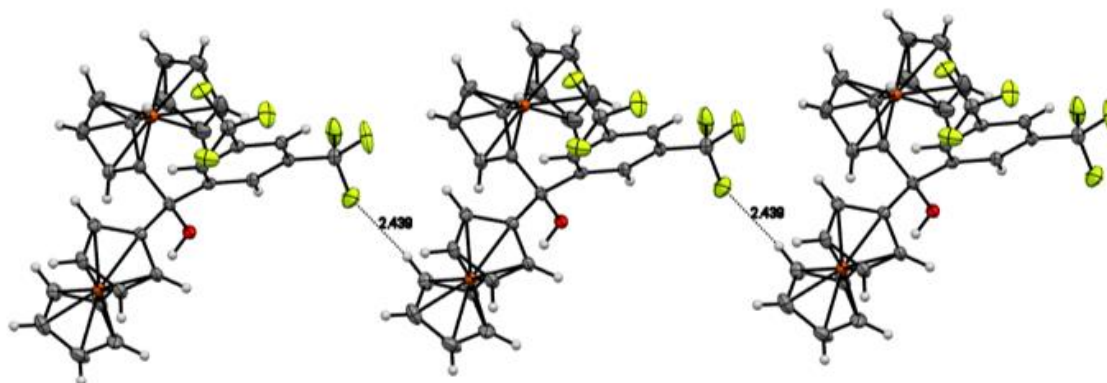

Figure S46: Perspective view of three molecules of complex **4-OH** with single C-H $\cdots$ F contacts of 2.439 Å interconnecting the individual molecules. The ellipsoids are displayed at a 50% probability level.

Table S5: Structure solution and refinement data for **4-OH**.

|                                             |                                                                  |
|---------------------------------------------|------------------------------------------------------------------|
| Empirical formula                           | C <sub>29</sub> H <sub>22</sub> F <sub>6</sub> Fe <sub>2</sub> O |
| Formula weight                              | 612.16                                                           |
| Temperature/K                               | 100                                                              |
| Crystal system                              | orthorhombic                                                     |
| Space group                                 | <i>Fdd2</i>                                                      |
| a/Å                                         | 15.9862(5)                                                       |
| b/Å                                         | 40.2342(8)                                                       |
| c/Å                                         | 14.6279(3)                                                       |
| α/°                                         | 90                                                               |
| β/°                                         | 90                                                               |
| γ/°                                         | 90                                                               |
| Volume/Å <sup>3</sup>                       | 9408.5(4)                                                        |
| Z                                           | 16                                                               |
| ρ <sub>calc</sub> /cm <sup>3</sup>          | 1.729                                                            |
| μ/mm <sup>-1</sup>                          | 1.304                                                            |
| F(000)                                      | 4960.0                                                           |
| Crystal size/mm <sup>3</sup>                | 0.6 × 0.467 × 0.2                                                |
| Radiation                                   | MoKα (λ = 0.71073)                                               |
| 2θ range for data collection/°              | 4.844 to 55.152                                                  |
| Index ranges                                | -20 ≤ h ≤ 20, -51 ≤ k ≤ 52, -18 ≤ l ≤ 18                         |
| Reflections collected                       | 9610                                                             |
| Independent reflections                     | 5389 [R <sub>int</sub> = 0.0226, R <sub>sigma</sub> = 0.0276]    |
| Data/restraints/parameters                  | 5389/1/346                                                       |
| Goodness-of-fit on F <sup>2</sup>           | 1.024                                                            |
| Final R indexes [I ≥ 2σ (I)]                | R <sub>1</sub> = 0.0238, wR <sub>2</sub> = 0.0577                |
| Final R indexes [all data]                  | R <sub>1</sub> = 0.0264, wR <sub>2</sub> = 0.0589                |
| Largest diff. peak/hole / e Å <sup>-3</sup> | 0.27/-0.37                                                       |
| Flack parameter                             | 0.000                                                            |

Crystal data and structure refinement for **5-OH**.

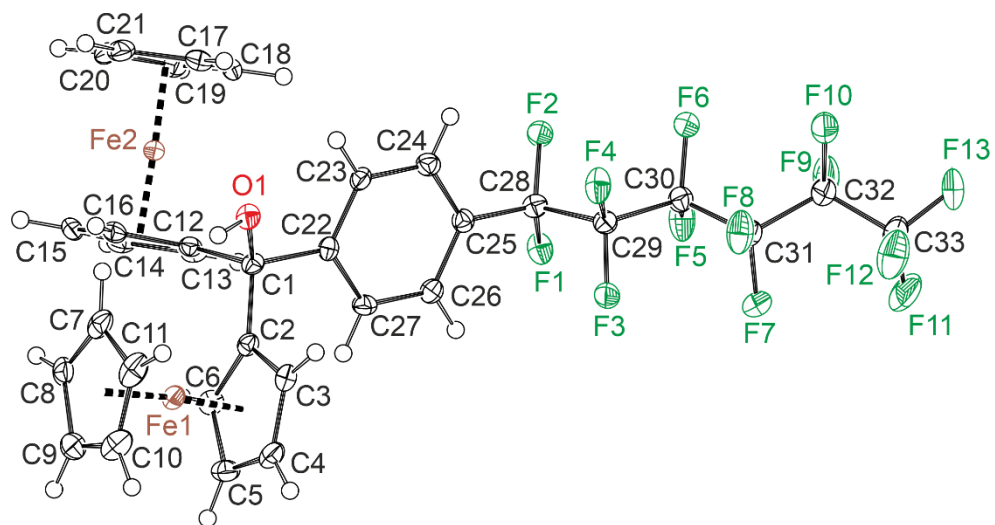

Figure S47: Perspective view of one of the independent molecules in the unit cell of complex **5-OH**. The ellipsoids are displayed at a 50% probability level.

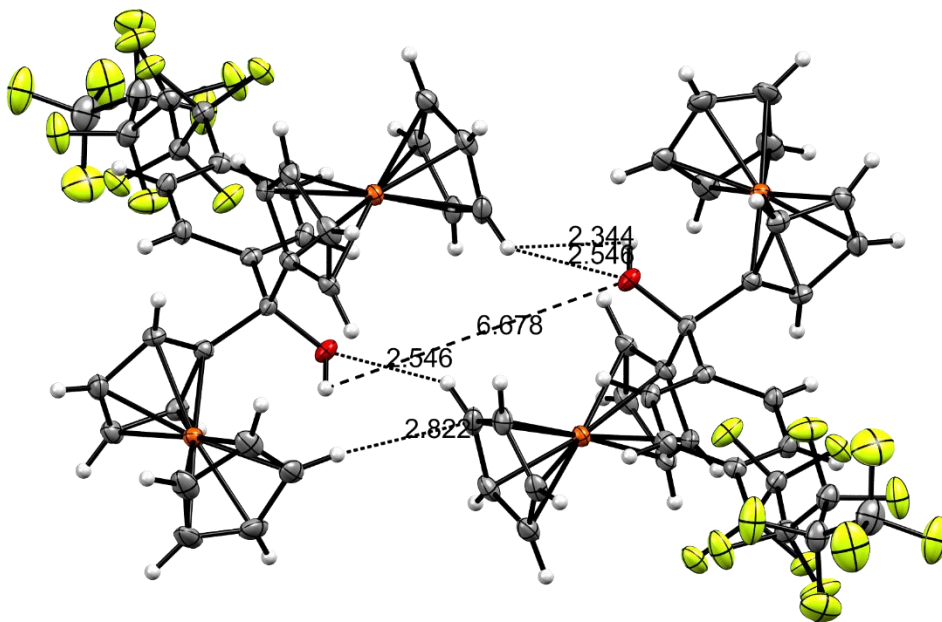

Figure S48: Perspective view of two molecules of complex **5-OH**. The ellipsoids are displayed at a 50% probability level.

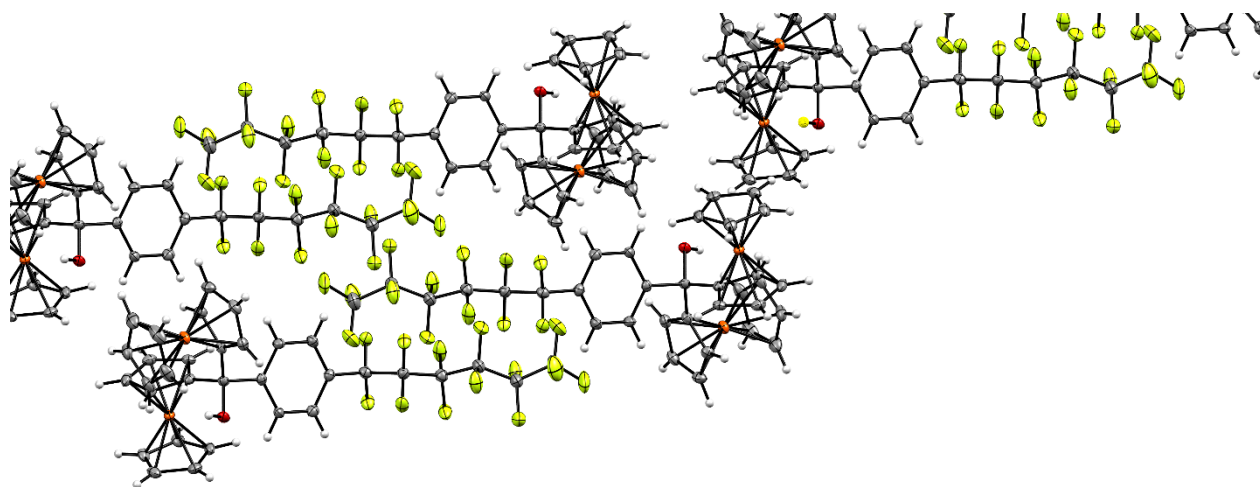

Figure S49: Perspective view of molecule chains in the crystal of **5-OH**. The ellipsoids are displayed at a 50% probability level.

Table S6: Structure solution and refinement data for **5-OH**.

|                                             |                                                                  |
|---------------------------------------------|------------------------------------------------------------------|
| Empirical formula                           | C <sub>29</sub> H <sub>22</sub> F <sub>6</sub> Fe <sub>2</sub> O |
| Formula weight                              | 612.16                                                           |
| Temperature/K                               | 100                                                              |
| Crystal system                              | orthorhombic                                                     |
| Space group                                 | <i>Fdd2</i>                                                      |
| a/Å                                         | 15.9862(5)                                                       |
| b/Å                                         | 40.2342(8)                                                       |
| c/Å                                         | 14.6279(3)                                                       |
| α/°                                         | 90                                                               |
| β/°                                         | 90                                                               |
| γ/°                                         | 90                                                               |
| Volume/Å <sup>3</sup>                       | 9408.5(4)                                                        |
| Z                                           | 16                                                               |
| ρ <sub>calc</sub> /cm <sup>3</sup>          | 1.729                                                            |
| μ/mm <sup>-1</sup>                          | 1.304                                                            |
| F(000)                                      | 4960.0                                                           |
| Crystal size/mm <sup>3</sup>                | 0.6 × 0.467 × 0.2                                                |
| Radiation                                   | MoKα (λ = 0.71073)                                               |
| 2θ range for data collection/°              | 4.844 to 55.152                                                  |
| Index ranges                                | -20 ≤ h ≤ 20, -51 ≤ k ≤ 52, -18 ≤ l ≤ 18                         |
| Reflections collected                       | 9610                                                             |
| Independent reflections                     | 5389 [R <sub>int</sub> = 0.0226, R <sub>sigma</sub> = 0.0276]    |
| Data/restraints/parameters                  | 5389/1/346                                                       |
| Goodness-of-fit on F <sup>2</sup>           | 1.024                                                            |
| Final R indexes [I ≥ 2σ (I)]                | R <sub>1</sub> = 0.0238, wR <sub>2</sub> = 0.0577                |
| Final R indexes [all data]                  | R <sub>1</sub> = 0.0264, wR <sub>2</sub> = 0.0589                |
| Largest diff. peak/hole / e Å <sup>-3</sup> | 0.27/-0.37                                                       |
| Flack parameter                             | 0.000                                                            |

Table S7: Comparison of the crystal data of the three cationic complexes **1<sup>+</sup>**, **4<sup>+</sup>** and **5<sup>+</sup>**.

|                                                                              | <b>1<sup>+</sup></b>                                            | <b>4<sup>+</sup></b>                                                 | <b>5<sup>+</sup></b>                                                  |
|------------------------------------------------------------------------------|-----------------------------------------------------------------|----------------------------------------------------------------------|-----------------------------------------------------------------------|
| Crystal System,<br>Space Group                                               | triclinic,<br><i>P</i> $\bar{1}$                                | monoclinic,<br><i>P</i> 2 <sub>1</sub> / <i>n</i>                    | triclinic,<br><i>P</i> $\bar{1}$                                      |
| Angle (CpFe1-CpFe1)                                                          | 5.28°                                                           | 6.36°                                                                | 8.51                                                                  |
| Angle (CpFe2-CpFe2)                                                          | 5.49°                                                           | 6.77°                                                                | 5.62                                                                  |
| Angle<br>(CpFe1Cp-CpFe2Cp)                                                   | 125.3(3)°                                                       | 126.5(10)°                                                           | 123.6(8)°                                                             |
| Angle<br>(CpFe1Cp-Ph)                                                        | 116.6(3)°                                                       | 114.7(10)°                                                           | 117.6(8)°                                                             |
| Angle<br>(CpFe2Cp-Ph)                                                        | 118.1(3)°                                                       | 118.8(10)°                                                           | 118.7(8)°                                                             |
| d(C-Ph)                                                                      | 1.477(5)                                                        | 1.505(15)                                                            | 1.488(12)                                                             |
| d(C-CpFe1)                                                                   | 1.435(4)                                                        | 1.415(15)                                                            | 1.437(13)                                                             |
| d(C-CpFe2)                                                                   | 1.426(6)                                                        | 1.422(16)                                                            | 1.397(13)                                                             |
| Fe1 (HCCH torsion angles of ferrocene) [°]                                   | -1.71,<br>-1.59,<br>-1.95,<br>-1.38,<br>-0.74<br><b>∅-1.474</b> | -25.57,<br>-20.75,<br>-21.96,<br>-23.28,<br>-23.89<br><b>∅-23.09</b> | -3.01,<br>-1.73,<br>-0.11,<br>-2.39,<br>-0.97<br><b>∅-1.642</b>       |
| Fe2 (HCCH torsion angles of ferrocene) [°]                                   | -7.38,<br>-5.18,<br>-6.01,<br>-4.95,<br>-3.74<br><b>∅-5.452</b> | -5.78,<br>-8.07,<br>-6.96,<br>-6.03,<br>-5.90<br><b>∅-6.548</b>      | -21.73,<br>-18.42,<br>-20.66,<br>-19.04,<br>-16.39<br><b>∅-19.248</b> |
| Ph: C <sub>ipso</sub> -C <sub>ortho</sub>                                    | 1.394(5)/<br>1.400(6)<br><b>∅1.397(6)</b>                       | 1.388(15)/<br>1.390(16)<br><b>∅1.389(16)</b>                         | 1.371(13)/<br>1.393(13)<br><b>∅1.382(13)</b>                          |
| Ph: C <sub>meta</sub> -C <sub>para</sub>                                     | 1.382(7)/<br>1.384(6)<br><b>∅1.383(7)</b>                       | 1.335(15)/<br>1.367(16)<br><b>∅1.351(16)</b>                         | 1.375(16)/<br>1.391(15)<br><b>∅1.383(16)</b>                          |
| Ph: C <sub>ortho</sub> -C <sub>meta</sub>                                    | 1.374(6)/<br>1.380(6)<br><b>∅1.377(6)</b>                       | 1.367(16)/<br>1.413(16)<br><b>∅1.390(16)</b>                         | 1.398(14)/<br>1.410(13)<br><b>∅1.404(14)</b>                          |
| Dihedral angle C2-C1-C22-C27                                                 | -46.25°                                                         | -45.50°                                                              | -57.55°                                                               |
| Dihedral angle C12-C1-C22-C23                                                | -47.40°                                                         | -46.87°                                                              | -60.98°                                                               |
| Rotation out of plane Cp(Fe1) to Phenyl                                      | 66.73°                                                          | 61.39°                                                               | 66.72°                                                                |
| Rotation out of plane Cp(Fe2) to Phenyl                                      | 60.55°                                                          | 61.94°                                                               | 65.12°                                                                |
| Rotation out of plane Cp(Fe1) to Cp(Fe2)                                     | 18.78°                                                          | 20.90°                                                               | 25.83°                                                                |
| d(C1-ipso-C-atoms(Cp))                                                       | 1.444(5),<br>1.437(5),<br>1.443(6),<br>1.451(6)                 | 1.489(15),<br>1.455(15),<br>1.458(16),<br>1.456(16)                  | 1.504(14),<br>1.447(13),<br>1.432(16),<br>1.482(16)                   |
| Angle C <sub>Cp,centr.</sub> -C <sub>ipso,Fc</sub> -C <sup>+</sup> (Fe1/Fe2) | 172.13/<br>166.39                                               | 173.73/<br>168.20                                                    | 167.16/<br>168.30                                                     |
| d(Cp <sub>centr</sub> -Fe1Cp <sub>centr</sub> )                              | 174.19                                                          | 172.89                                                               | 173.24                                                                |
| d(Cp <sub>centr</sub> -Fe2Cp <sub>centr</sub> )                              | 174.31                                                          | 173.40                                                               | 173.49                                                                |

[a] Distances d in Å.

Crystal data and structure refinement for **1<sup>+</sup>**.

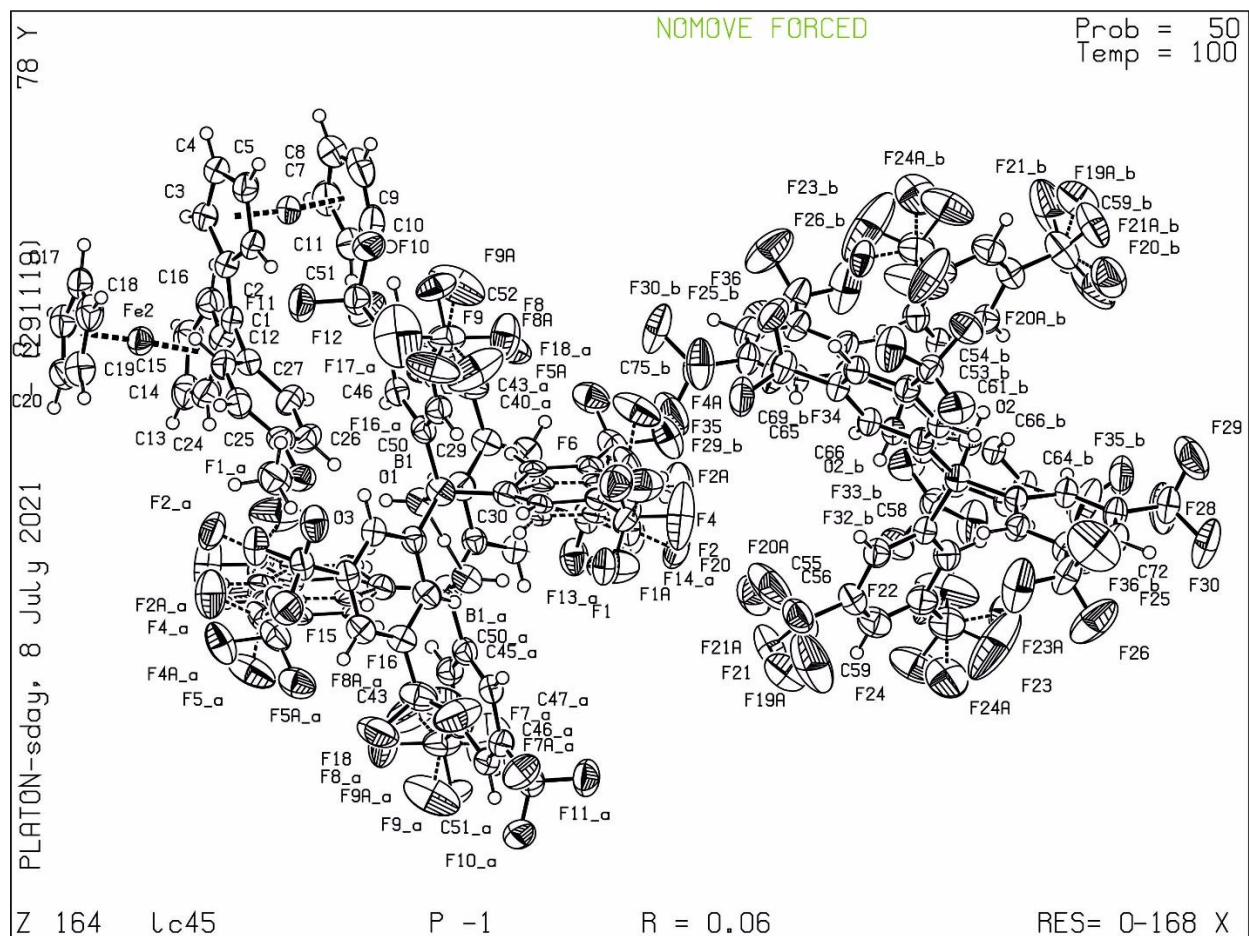

Figure S50: Perspective view of one of the independent molecules (cations and anions) in the unit cell of complex **1<sup>+</sup>**. The ellipsoids are displayed at a 50% probability level.



Table S8: Structure solution and refinement data for **1<sup>+</sup>**.

|                                             |                                                                                               |
|---------------------------------------------|-----------------------------------------------------------------------------------------------|
| Empirical formula                           | C <sub>76</sub> H <sub>46</sub> B <sub>2</sub> F <sub>36</sub> Fe <sub>2</sub> O <sub>3</sub> |
| Formula weight                              | 1824.45                                                                                       |
| Temperature/K                               | 100.0                                                                                         |
| Crystal system                              | triclinic                                                                                     |
| Space group                                 | <i>P</i> $\bar{1}$                                                                            |
| a/Å                                         | 12.8380(4)                                                                                    |
| b/Å                                         | 15.1737(5)                                                                                    |
| c/Å                                         | 23.1393(8)                                                                                    |
| α/°                                         | 95.572(3)                                                                                     |
| β/°                                         | 99.689(3)                                                                                     |
| γ/°                                         | 101.636(3)                                                                                    |
| Volume/Å <sup>3</sup>                       | 4311.7(3)                                                                                     |
| Z                                           | 2                                                                                             |
| ρ <sub>calc</sub> /cm <sup>3</sup>          | 1.405                                                                                         |
| μ/mm <sup>-1</sup>                          | 0.457                                                                                         |
| F(000)                                      | 1824.0                                                                                        |
| Crystal size/mm <sup>3</sup>                | 0.15 × 0.123 × 0.1                                                                            |
| Radiation                                   | MoKα (λ = 0.71073)                                                                            |
| 2θ range for data collection/°              | 4.054 to 53.7                                                                                 |
| Index ranges                                | -16 ≤ h ≤ 15, -19 ≤ k ≤ 19, -29 ≤ l ≤ 29                                                      |
| Reflections collected                       | 41329                                                                                         |
| Independent reflections                     | 18527 [R <sub>int</sub> = 0.0452, R <sub>sigma</sub> = 0.0619]                                |
| Data/restraints/parameters                  | 18527/212/1285                                                                                |
| Goodness-of-fit on F <sup>2</sup>           | 1.026                                                                                         |
| Final R indexes [I ≥ 2σ (I)]                | R <sub>1</sub> = 0.0619, wR <sub>2</sub> = 0.1592                                             |
| Final R indexes [all data]                  | R <sub>1</sub> = 0.1164, wR <sub>2</sub> = 0.1883                                             |
| Largest diff. peak/hole / e Å <sup>-3</sup> | 0.61/-0.54                                                                                    |

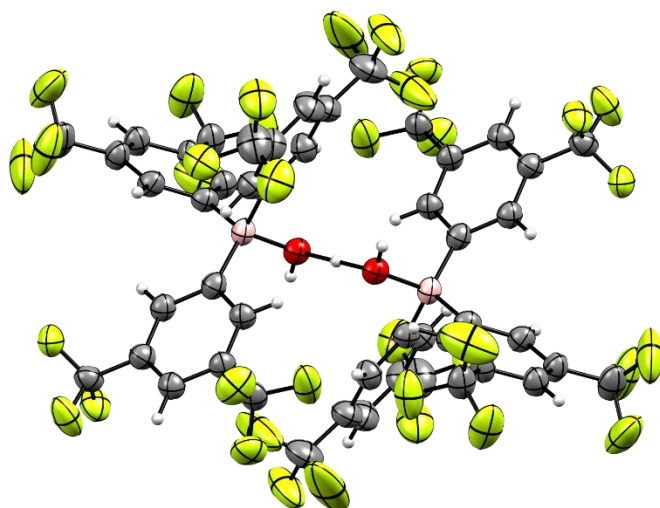

Figure S51: Perspective view of one of the hydrogen-bonded dimeric anions in complex  $1^+$ . The ellipsoids are displayed at a 50% probability level.

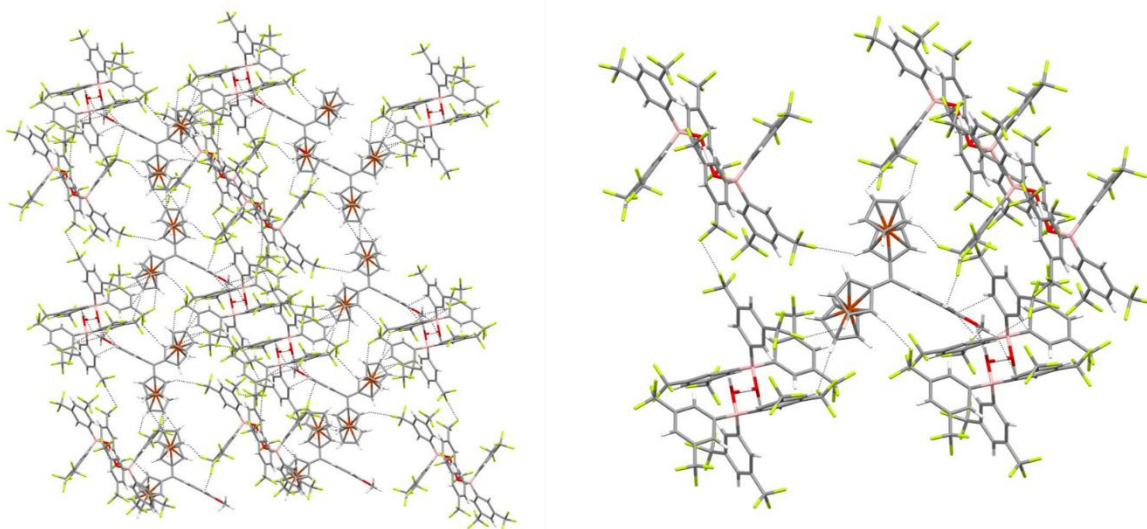

Figure S52: Perspective view of multiple cations and anions from complex  $1^+$ .

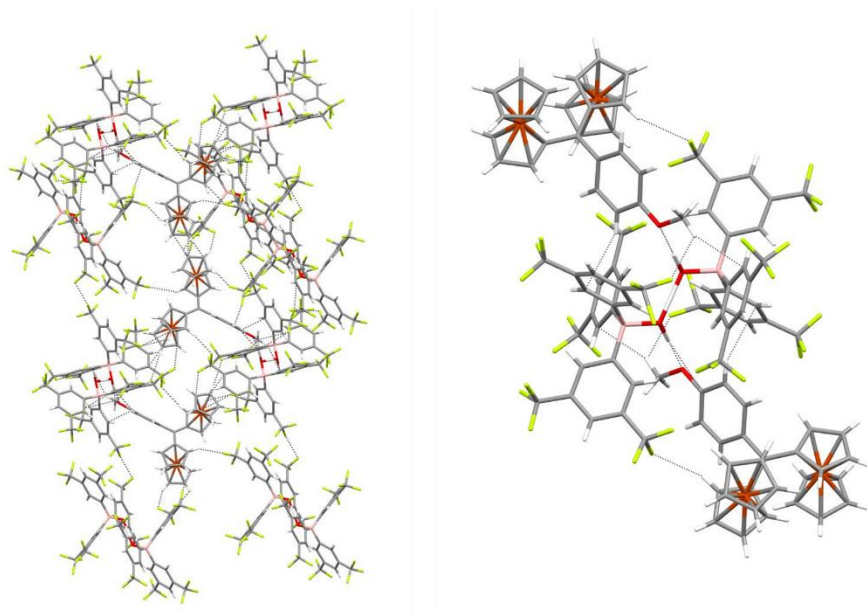

Figure S53: Perspective view of the hydrogen bonding patterns within the molecules in complex  $1^+$ .

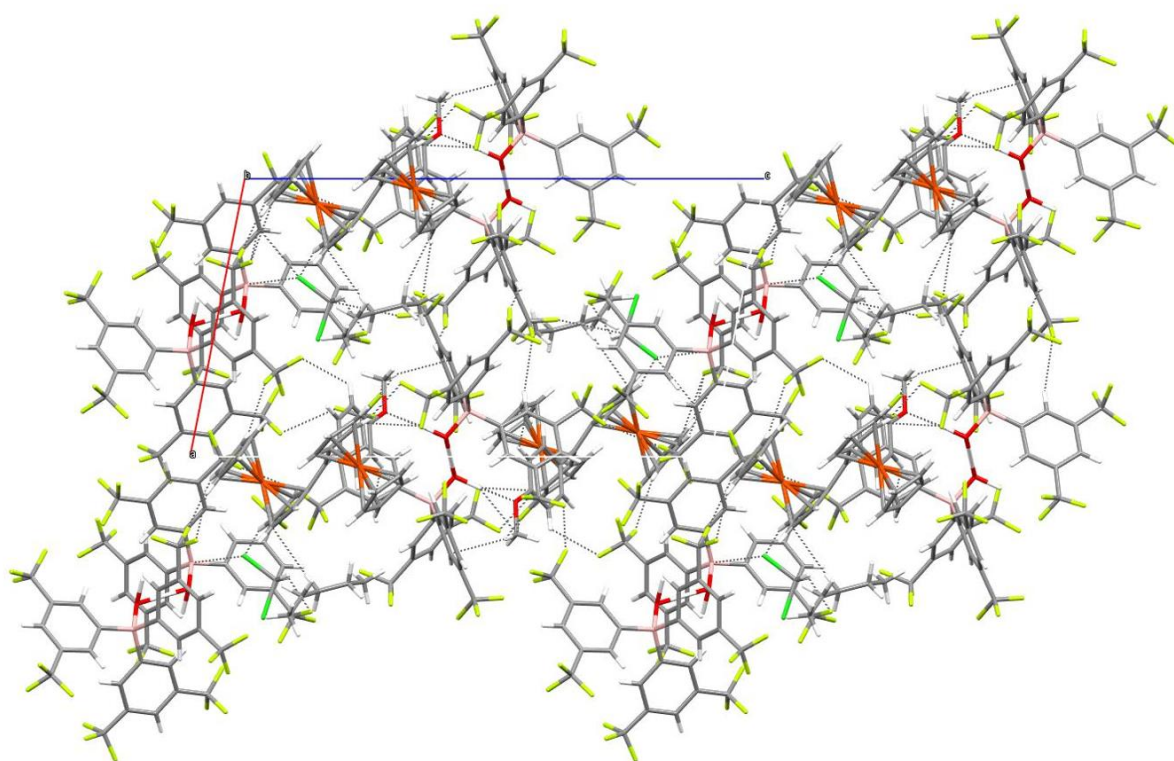

Figure S54: Perspective view along the  $a$  and  $c$  axis of the unit cell of complex  $1^+$ .

Crystal data and structure refinement for  $4^+$ .

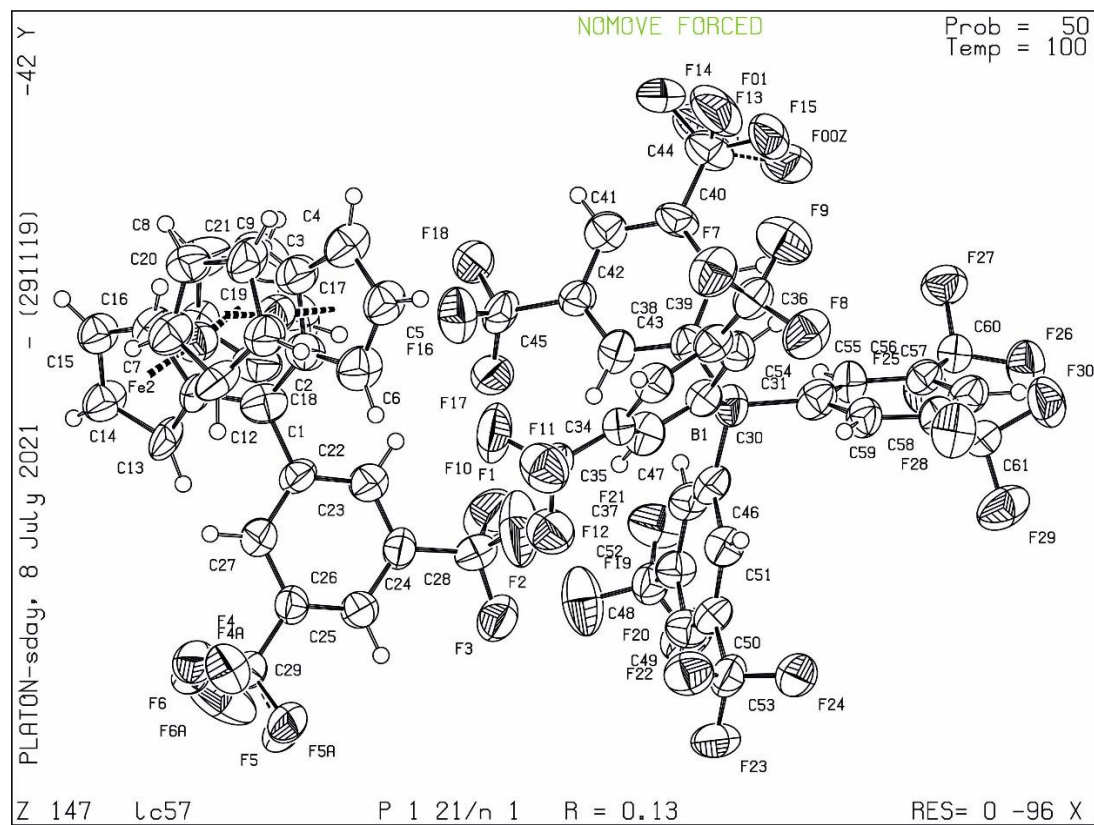

Figure S55: Perspective view of one of the independent molecules (cations and anions) in the unit cell of complex  $4^+$ . The ellipsoids are displayed at a 50% probability level.

Table S9: Structure solution and refinement data for **4<sup>+</sup>**.

|                                             |                                                                  |
|---------------------------------------------|------------------------------------------------------------------|
| Empirical formula                           | C <sub>61</sub> H <sub>33</sub> BF <sub>30</sub> Fe <sub>2</sub> |
| Formula weight                              | 1458.38                                                          |
| Temperature/K                               | 100                                                              |
| Crystal system                              | monoclinic                                                       |
| Space group                                 | P2 <sub>1</sub> /n                                               |
| a/Å                                         | 13.0996(5)                                                       |
| b/Å                                         | 20.2030(7)                                                       |
| c/Å                                         | 22.6739(9)                                                       |
| α/°                                         | 90                                                               |
| β/°                                         | 92.688(3)                                                        |
| γ/°                                         | 90                                                               |
| Volume/Å <sup>3</sup>                       | 5994.1(4)                                                        |
| Z                                           | 4                                                                |
| ρ <sub>calc</sub> /cm <sup>3</sup>          | 1.616                                                            |
| μ/mm <sup>-1</sup>                          | 5.104                                                            |
| F(000)                                      | 2904.0                                                           |
| Crystal size/mm <sup>3</sup>                | 0.2 × 0.1 × 0.01                                                 |
| Radiation                                   | Cu Kα (λ = 1.54186)                                              |
| 2θ range for data collection/°              | 5.862 to 135.268                                                 |
| Index ranges                                | -15 ≤ h ≤ 15, -23 ≤ k ≤ 22, -25 ≤ l ≤ 25                         |
| Reflections collected                       | 32021                                                            |
| Independent reflections                     | 10473 [R <sub>int</sub> = 0.0804, R <sub>sigma</sub> = 0.0840]   |
| Data/restraints/parameters                  | 10473/39/895                                                     |
| Goodness-of-fit on F <sup>2</sup>           | 1.475                                                            |
| Final R indexes [I ≥ 2σ (I)]                | R <sub>1</sub> = 0.1348, wR <sub>2</sub> = 0.3436                |
| Final R indexes [all data]                  | R <sub>1</sub> = 0.2048, wR <sub>2</sub> = 0.4318                |
| Largest diff. peak/hole / e Å <sup>-3</sup> | 1.72/-0.74                                                       |

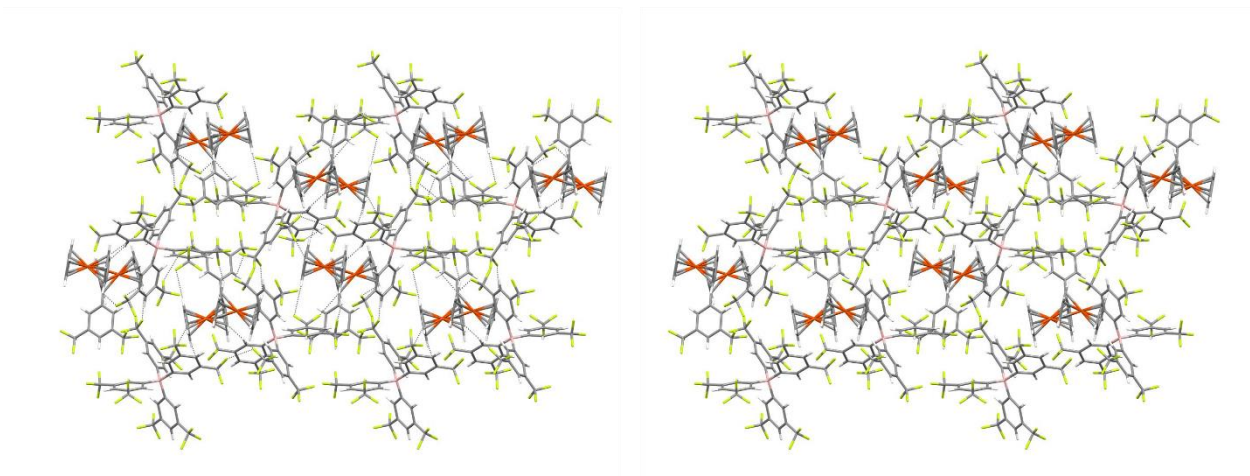

Figure S56: Perspective view on molecule (anion and cation) order within the molecules of complex  $4^+$ .

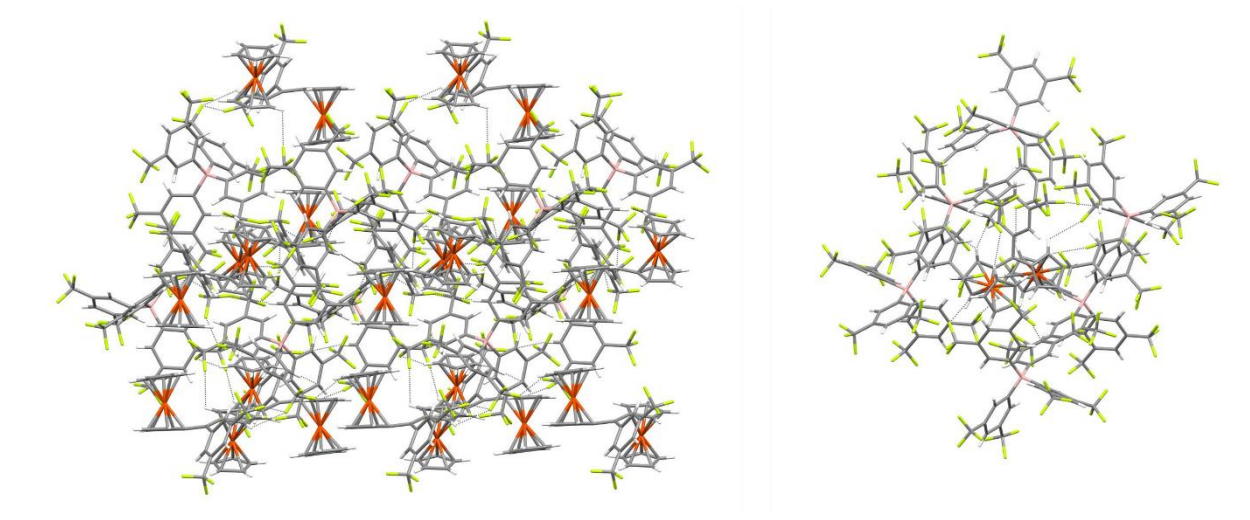

Figure S57: Side-on view on ferrocenes (left) and long distance bonding interaction between the anions and the centrally depicted cation (right) within the molecules of complex  $4^+$ .



Crystal data and structure refinement for  $5^+$ .

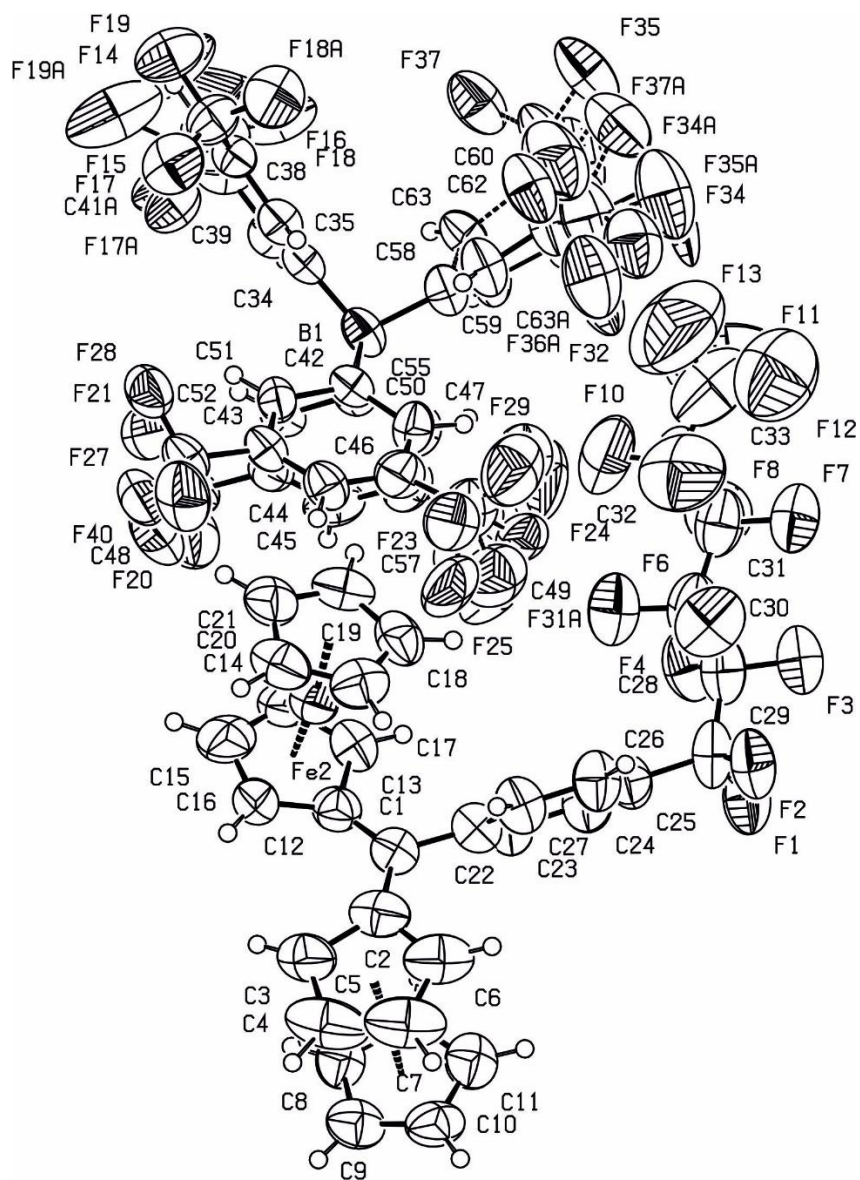

Figure S58: Perspective view of one of the independent molecules (cations and anions) in the unit cell of complex  $5^+$ . The ellipsoids are displayed at a 50% probability level.

This crystal unfortunately did not provide data of sufficient precision for in-depth discussion of the bond lengths (see Table S10).

Table S10: Structure solution and refinement data for 5<sup>+</sup>.

|                                             |                                                                                 |
|---------------------------------------------|---------------------------------------------------------------------------------|
| Empirical formula                           | C <sub>130</sub> H <sub>68</sub> B <sub>2</sub> F <sub>74</sub> Fe <sub>4</sub> |
| Formula weight                              | 3280.86                                                                         |
| Temperature/K                               | 100.0                                                                           |
| Crystal system                              | triclinic                                                                       |
| Space group                                 | P-1                                                                             |
| a/Å                                         | 13.5975(8)                                                                      |
| b/Å                                         | 14.2300(10)                                                                     |
| c/Å                                         | 19.8660(15)                                                                     |
| α/°                                         | 78.080(6)                                                                       |
| β/°                                         | 85.474(6)                                                                       |
| γ/°                                         | 66.115(5)                                                                       |
| Volume/Å <sup>3</sup>                       | 3438.9(4)                                                                       |
| Z                                           | 1                                                                               |
| ρ <sub>calc</sub> /cm <sup>3</sup>          | 1.584                                                                           |
| μ/mm <sup>-1</sup>                          | 0.562                                                                           |
| F(000)                                      | 1628.0                                                                          |
| Crystal size/mm <sup>3</sup>                | 0.2 × 0.133 × 0.1                                                               |
| Radiation                                   | MoKα (λ = 0.71073)                                                              |
| 2θ range for data collection/°              | 4.756 to 55.486                                                                 |
| Index ranges                                | -16 ≤ h ≤ 17, -18 ≤ k ≤ 18, -25 ≤ l ≤ 25                                        |
| Reflections collected                       | 32324                                                                           |
| Independent reflections                     | 15784 [R <sub>int</sub> = 0.0944, R <sub>sigma</sub> = 0.1139]                  |
| Data/restraints/parameters                  | 15784/331/1113                                                                  |
| Goodness-of-fit on F <sup>2</sup>           | 1.102                                                                           |
| Final R indexes [I ≥ 2σ (I)]                | R <sub>1</sub> = 0.1202, wR <sub>2</sub> = 0.3318                               |
| Final R indexes [all data]                  | R <sub>1</sub> = 0.2232, wR <sub>2</sub> = 0.3944                               |
| Largest diff. peak/hole / e Å <sup>-3</sup> | 1.58/-0.67                                                                      |



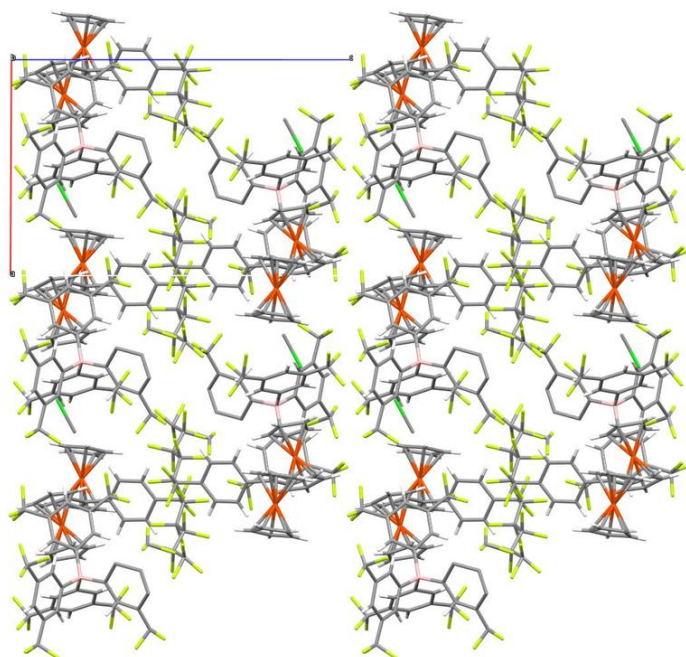

Figure S59: Perspective view on the perfluorinated chain interactions in crystalline  $5^+ \text{BAR}_{24}^-$ .

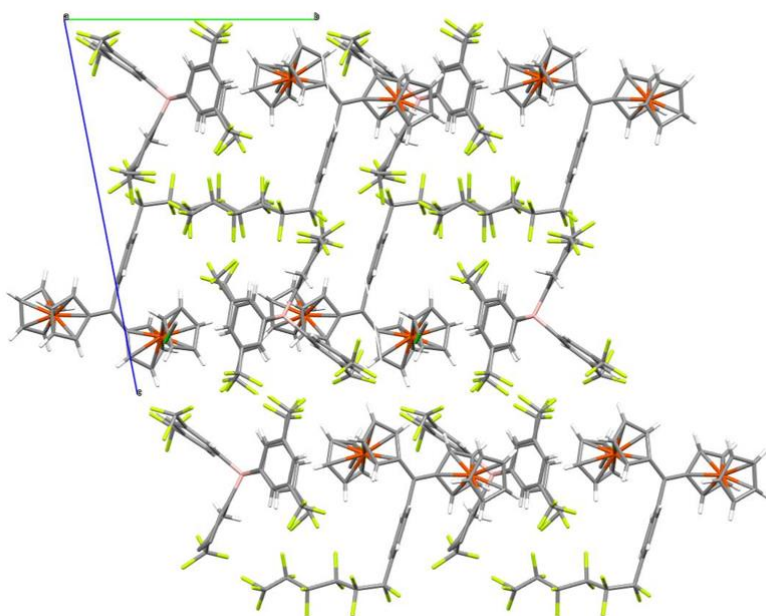

Figure S60: Different-angle perspective view on the perfluorinated chain interactions from complex  $5^+$ .

## Cyclic Voltammetry

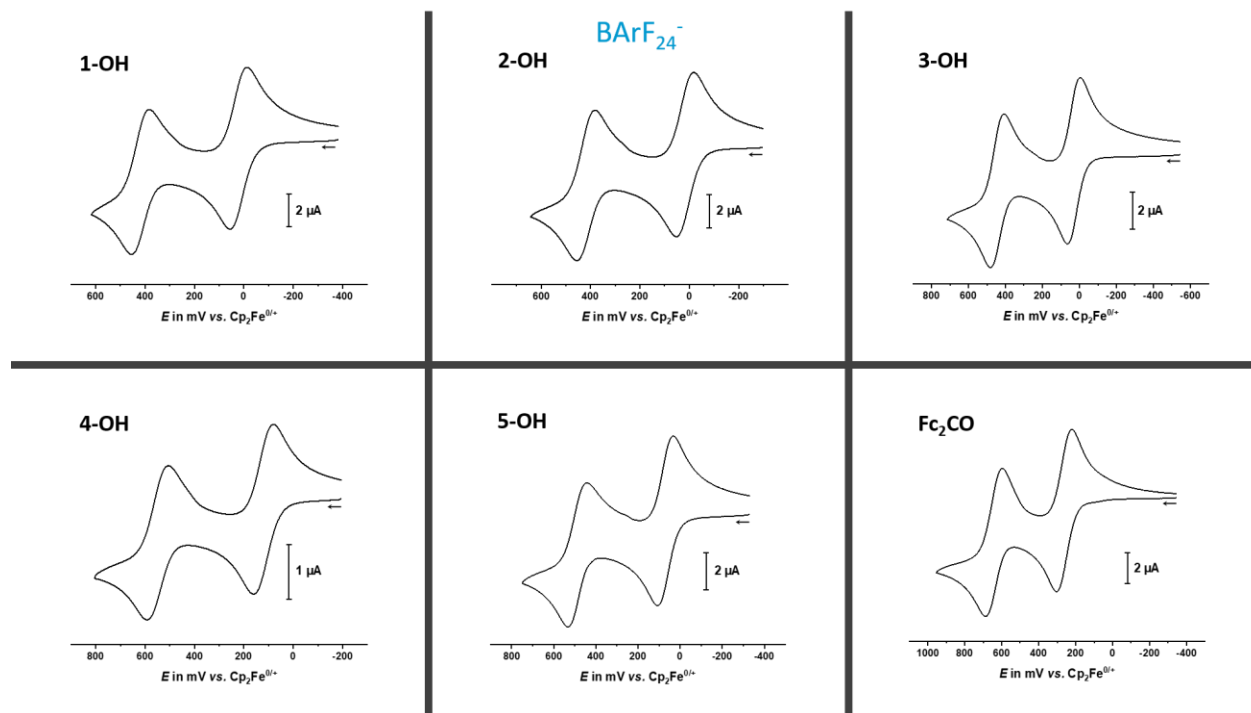

Figure S61: Cyclic voltammograms of the carbinol precursors **1-OH** – **5-OH** at  $v = 100 \text{ mVs}^{-1}$  with y-axis peak current scales in  $0.1 \text{ M CH}_2\text{Cl}_2/\text{NBu}_4^+ [\text{BARF}_{24}]^-$ .

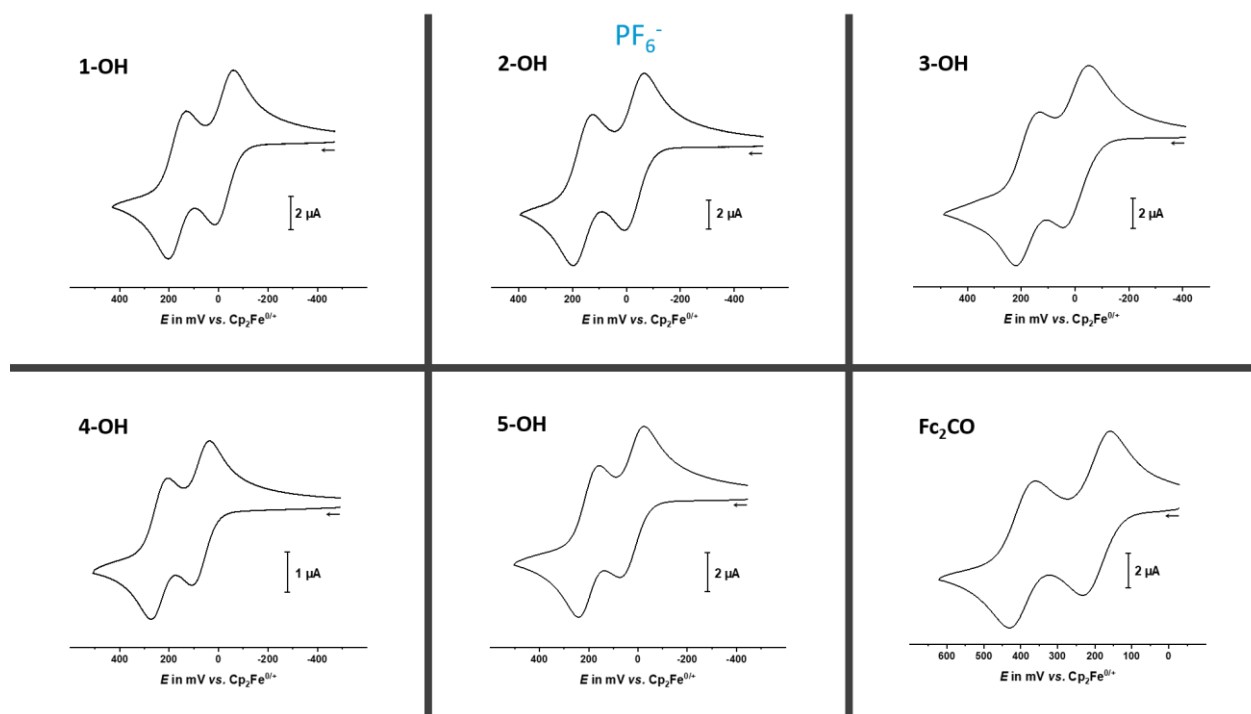

Figure S62: Cyclic voltammograms of the carbinol precursors **1-OH** – **5-OH** at  $v = 100 \text{ mVs}^{-1}$  with y-axis peak current scales in  $0.1 \text{ M CH}_2\text{Cl}_2/\text{NBu}_4^+ [\text{PF}_6]^-$ .

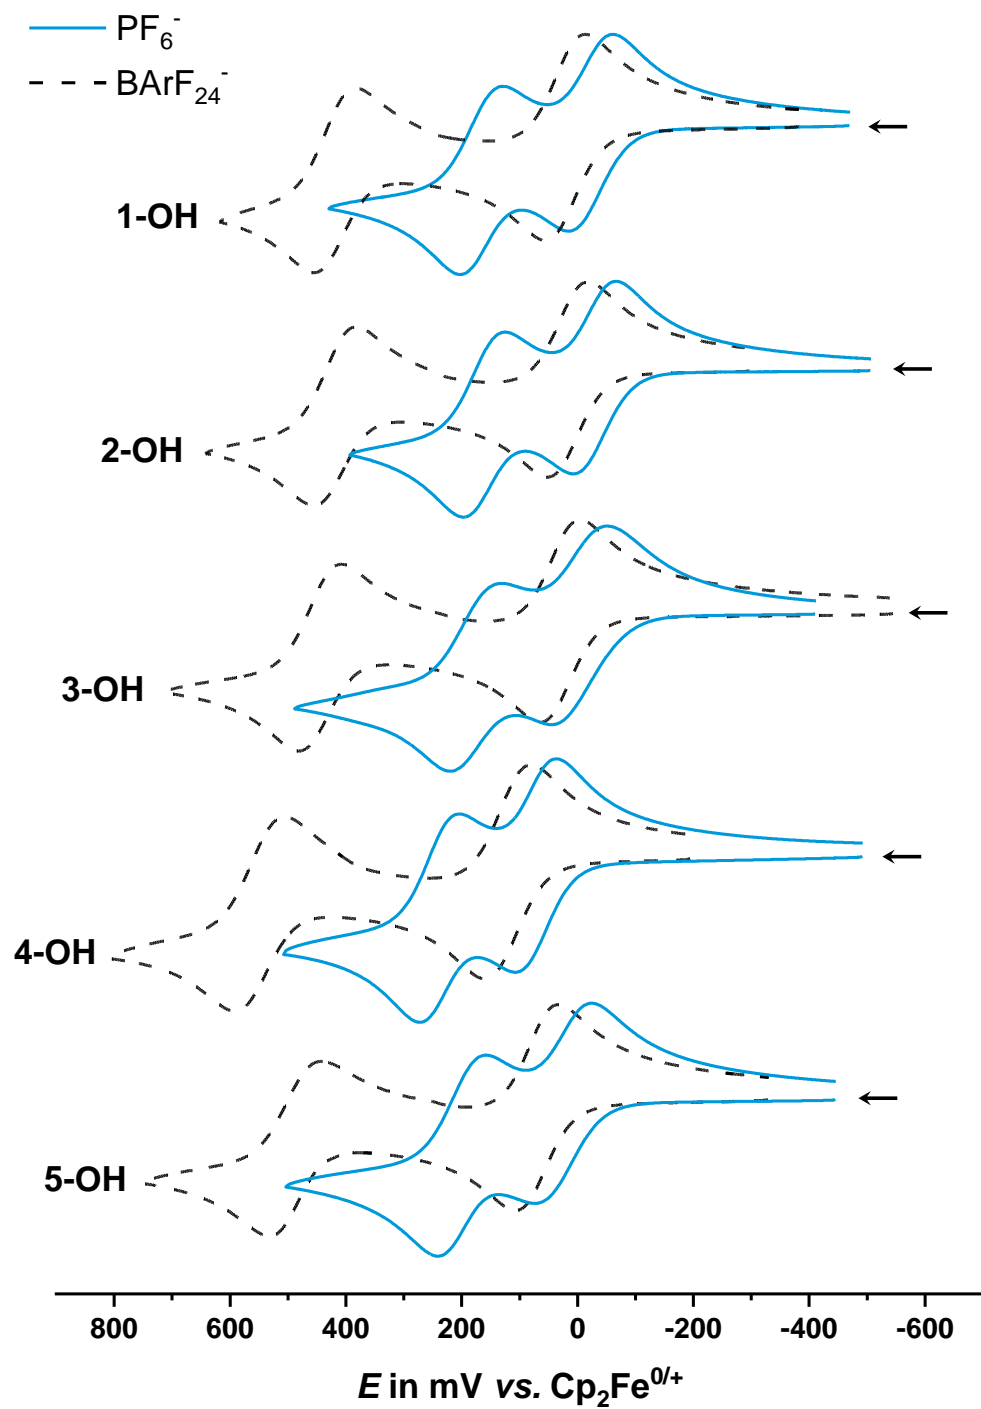

Figure S63: Cyclic voltammograms of the carbinol precursors **1-OH** (top) to **5-OH** (bottom) at  $v = 100 \text{ mVs}^{-1}$  in 0.1 M  $\text{CH}_2\text{Cl}_2/\text{NBu}_4^+ [\text{PF}_6]^-$  (blue line) and in 0.1 M  $\text{CH}_2\text{Cl}_2/\text{NBu}_4^+ [\text{BArF}_{24}]^-$  (black dotted line).

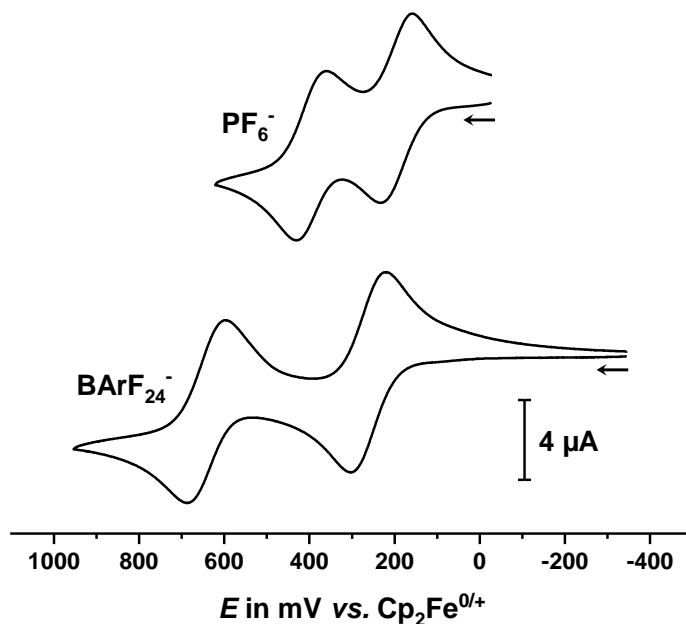

Figure S64: Cyclic voltammograms of the ketone  $\text{Fc}_2\text{CO}$  at  $v = 100 \text{ mVs}^{-1}$  in  $0.1 \text{ M CH}_2\text{Cl}_2 / \text{NBu}_4^+ [\text{PF}_6]^-$  (top) and  $\text{CH}_2\text{Cl}_2 / \text{NBu}_4^+ [\text{BArF}_{24}]^-$  (bottom).

Table S11: Additional electrochemical and DFT-computed data for cationic ferrocenylmethylum complexes in  $\text{CH}_2\text{Cl}_2 / \text{NBu}_4^+ [\text{BArF}_{24}]^-$ .

| $\text{X}^+$             | $\Delta E_{1/2}^{[a]}$ | $\Delta_{\text{HOMO-LUMO}}^{[b]}$ |
|--------------------------|------------------------|-----------------------------------|
| <b>1</b>                 | 1575                   | 3.104                             |
| <b>2</b>                 | 1550                   | 3.080                             |
| <b>3</b>                 | 1510                   | 3.063                             |
| <b>4</b>                 | 1435                   | 3.021                             |
| <b>5</b>                 | 1530                   | 3.030                             |
| <b>FcPh<sub>2</sub>C</b> | 1460                   | 3.100                             |
| <b>Fc<sub>2</sub>PhC</b> | 1340                   | 3.072                             |
| <b>Fc<sub>3</sub>C</b>   | 1090                   | 2.834                             |

[a] Half-wave potential separation in mV. [b] From DFT calculations done in this work with charge 1 and multiplicity 1.

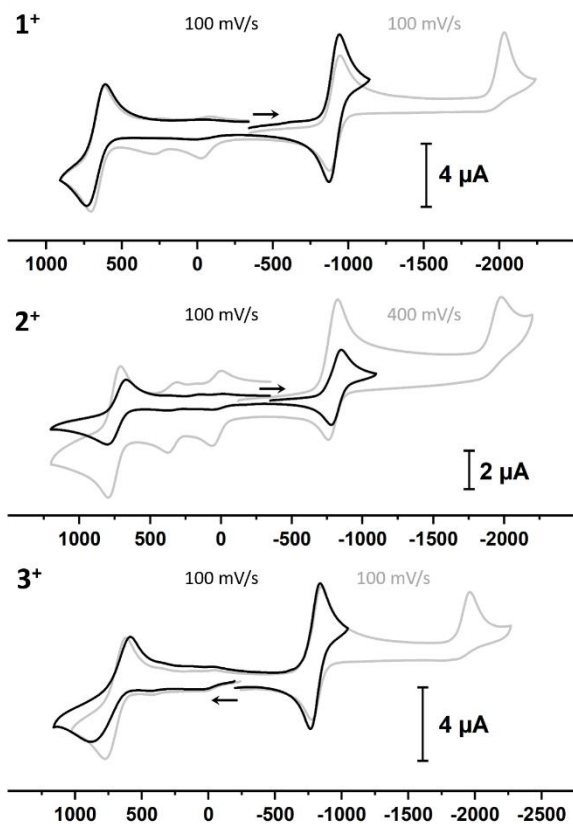

Figure S65: Comparison of cyclic voltammograms recorded after passing through the first (black lines) or the second (grey lines) reductions of cations  $1^+$ - $3^+$ .

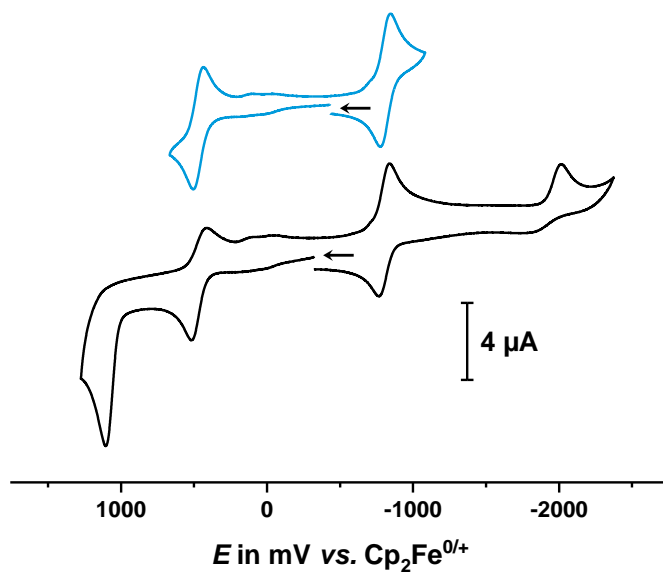

Figure S66: Cyclic voltammograms of  $2^+$  at  $v = 100 \text{ mV s}^{-1}$  in  $0.1 \text{ M CH}_2\text{Cl}_2 / \text{NBu}_4^+ [\text{PF}_6]^-$ .

## Hammett Plots: Part II

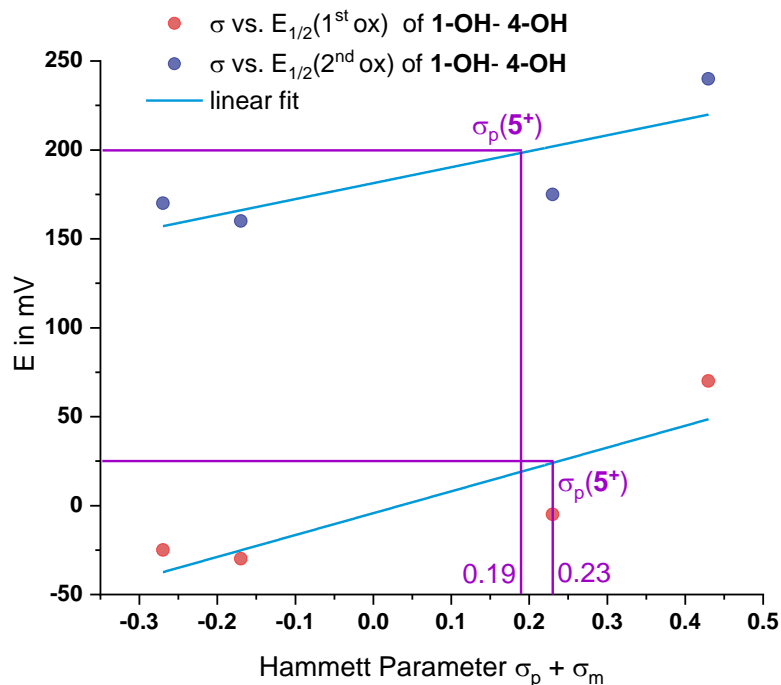

Figure S67: Hammett plot for the oxidation potentials of the first and the second oxidations in  $\text{NBu}_4^+$   $[\text{BAR}_{24}^{\text{F}}]^-$  of the carbinols **1-OH** – **4-OH**;  $\sigma_p$  ( $\text{C}_6\text{F}_{13}$ ) is here approximated by the pink lines to +0.19 and +0.23.

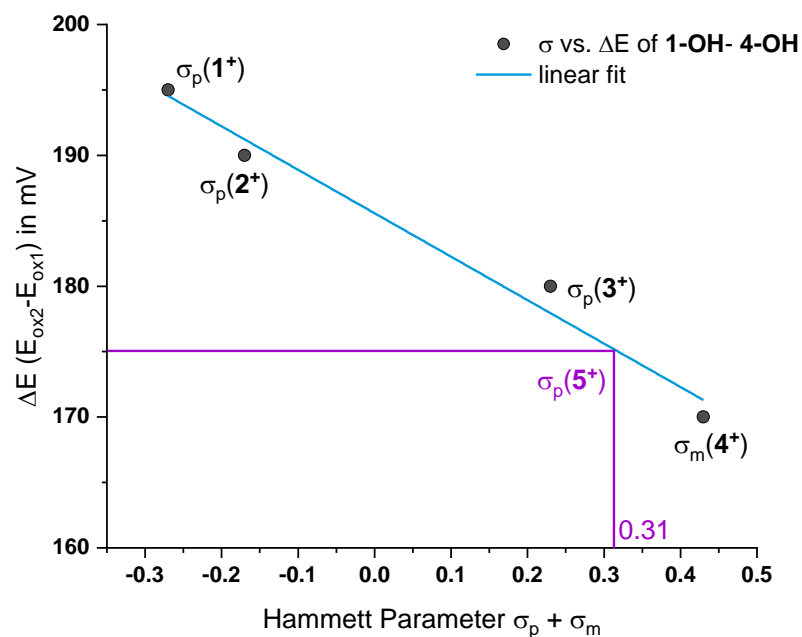

Figure S68: Hammett plot for the redox potential separation between second and the first oxidations of the carbinol complexes **1-OH** – **4-OH** in  $\text{NBu}_4^+$   $[\text{BAR}_{24}^{\text{F}}]^-$ ;  $\sigma_p$  ( $\text{C}_6\text{F}_{13}$ ) is here approximated by the pink lines to +0.31.

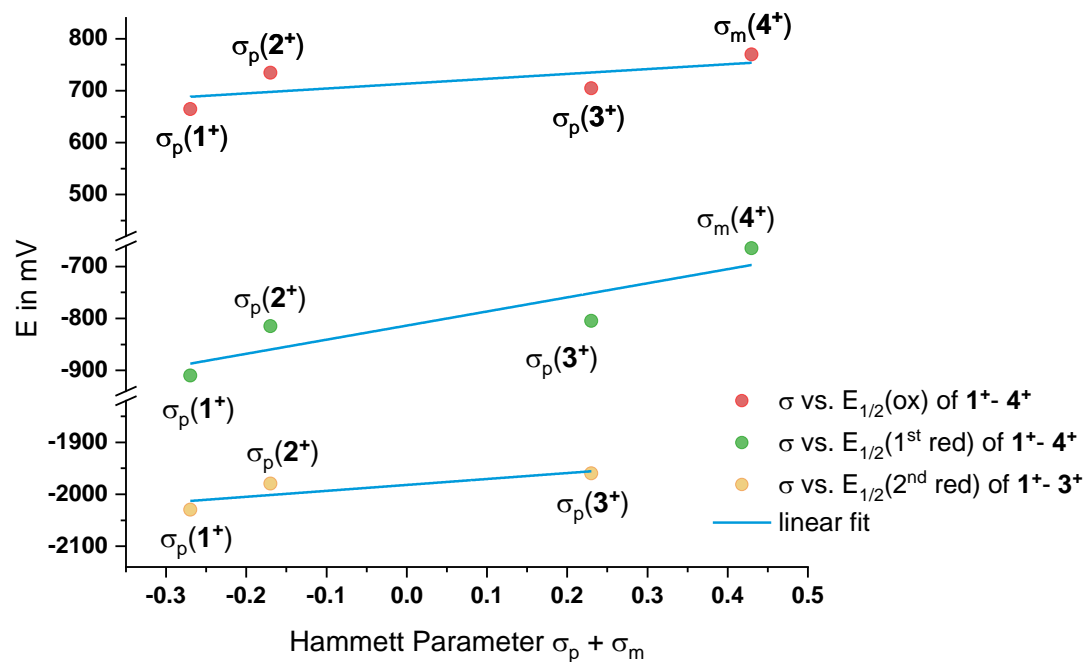

Figure S69: Hammett plot for the oxidation and reduction potentials of the cationic complexes  $1^+ - 4^+$  in  $\text{NBu}_4^+ [\text{BARF}_{24}]^-$ .

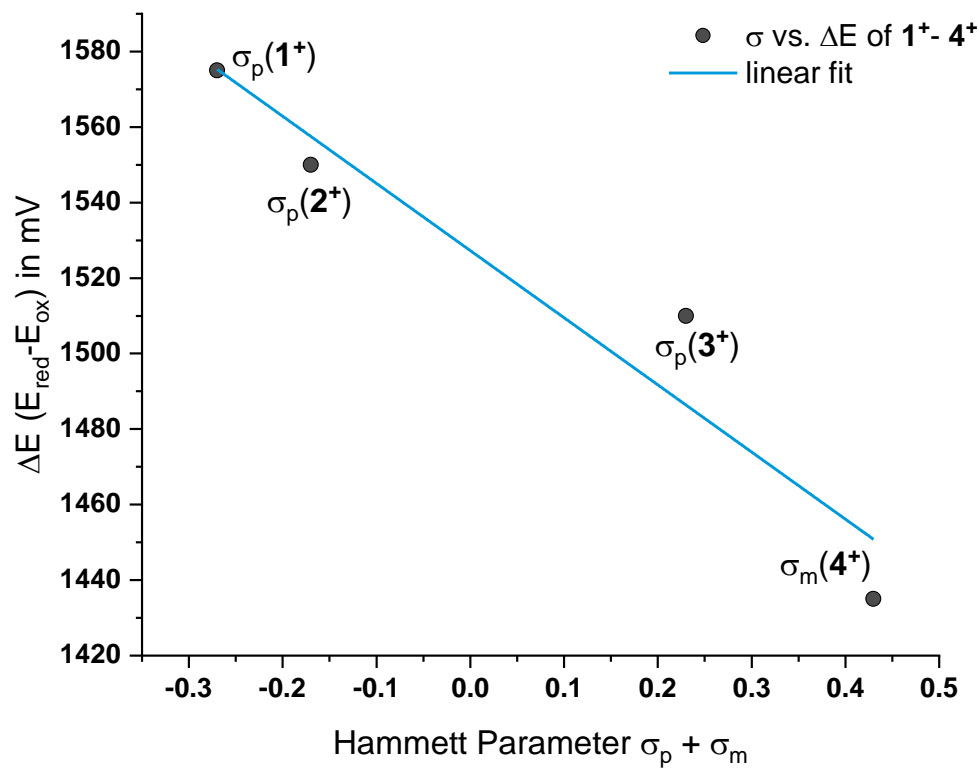

Figure S70: Hammett plot for the redox potential separation between the oxidation and the reduction of the cationic complexes  $1^+ - 4^+$  in  $\text{NBu}_4^+ [\text{BARF}_{24}]^-$ .

UV/Vis/NIR Spectro(electro)chemical Data and TD-DFT calculations

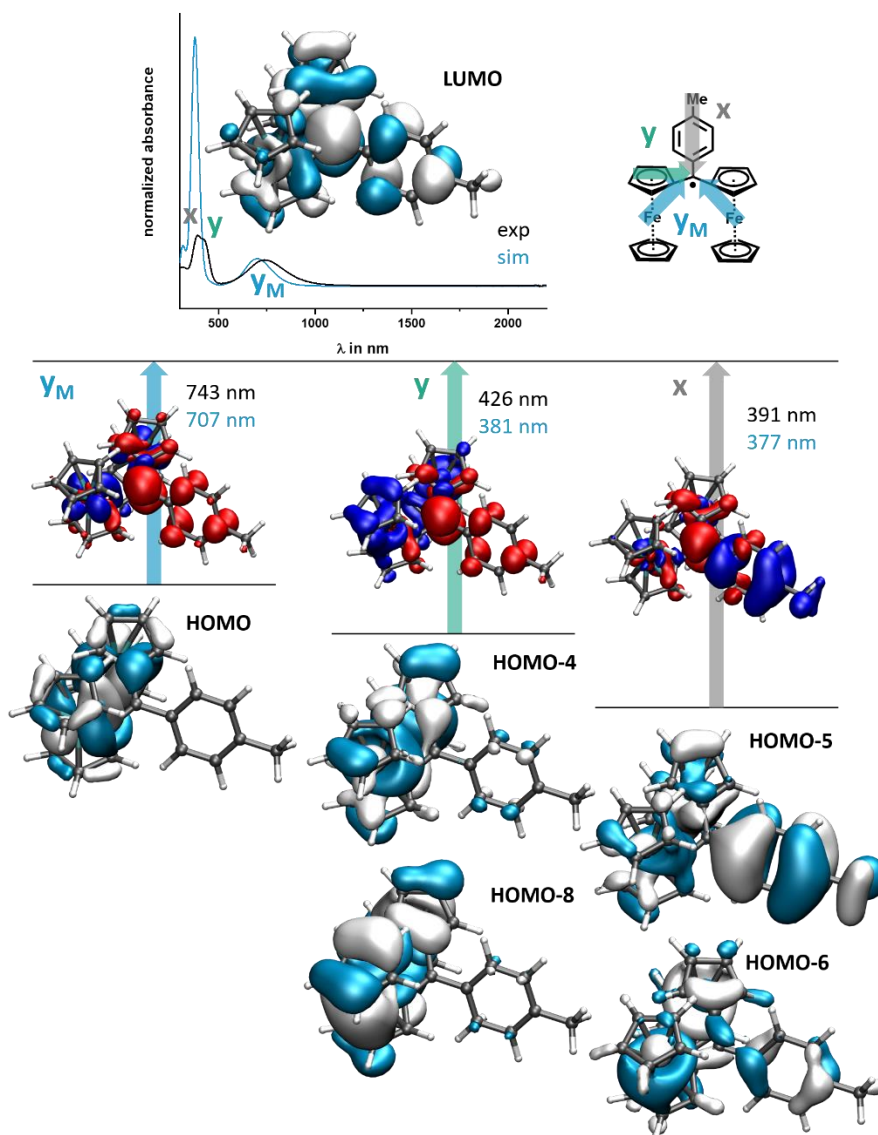

Figure S71: Molecular orbital contributions to major transitions of complex  $2^+$  calculated *via* TD-DFT, EDDMs (electron density difference maps; blue: loss of electron density; red: gain in electron density). The top panel compares the experimental (black line) and the TD-DFT-calculated spectrum (blue line). A schematic assignment of the electronic transitions is given at the top right.



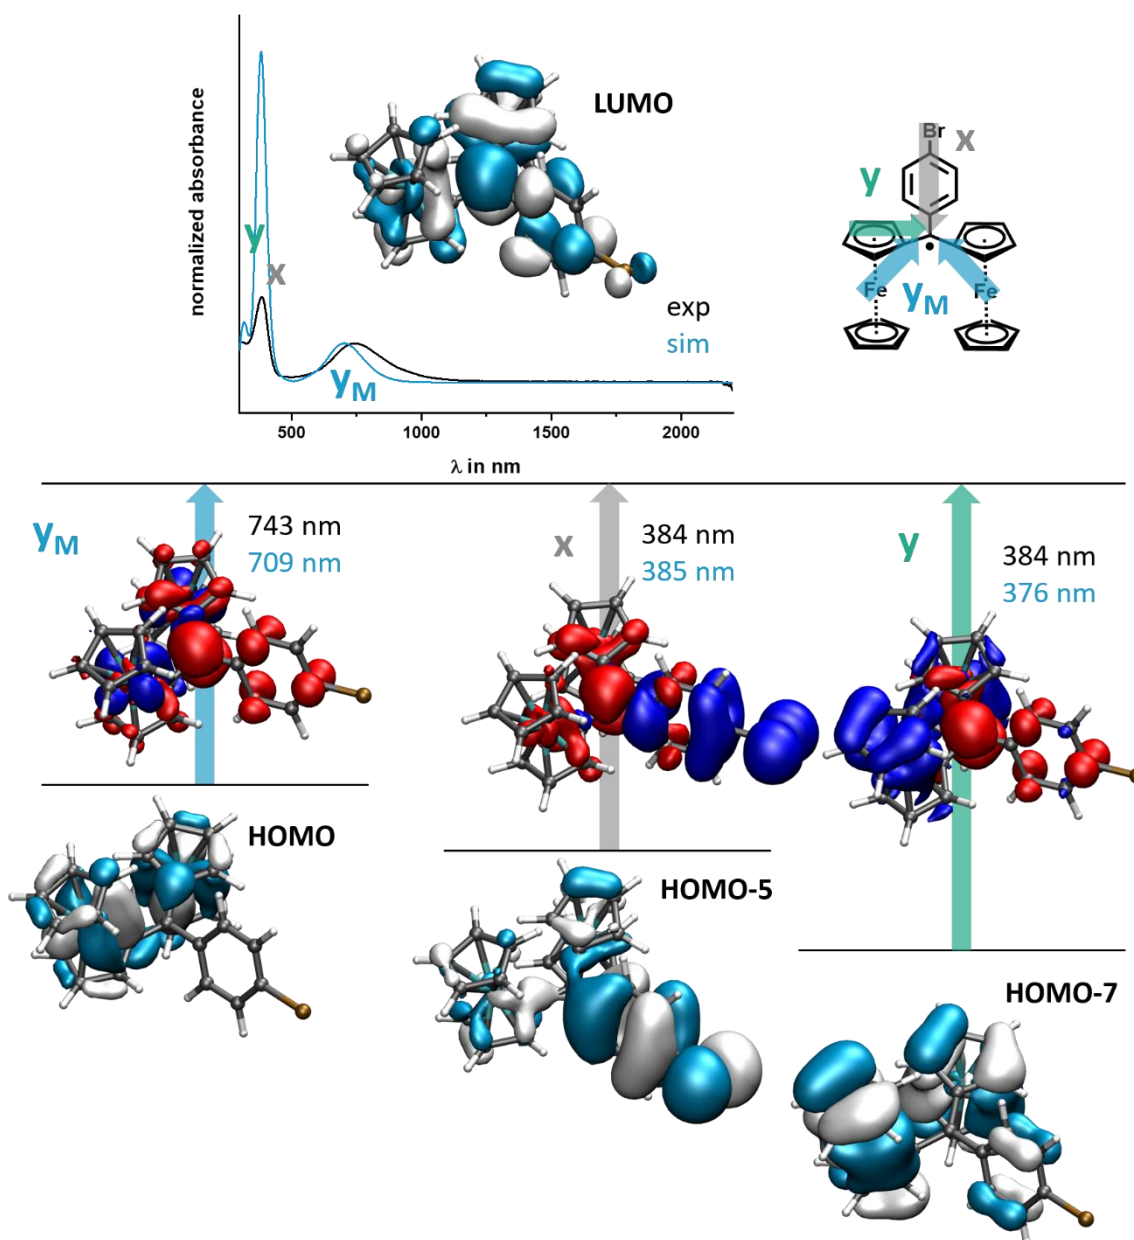

Figure S72: Molecular orbital contributions to major transitions of complex  $3^+$  calculated *via* TD-DFT, EDDMs (electron density difference maps; blue: loss of electron density; red: gain in electron density). The top panel compares the experimental (black line) and the TD-DFT calculated spectrum (blue line). A schematic assignment of the electronic transitions is given at the top right.

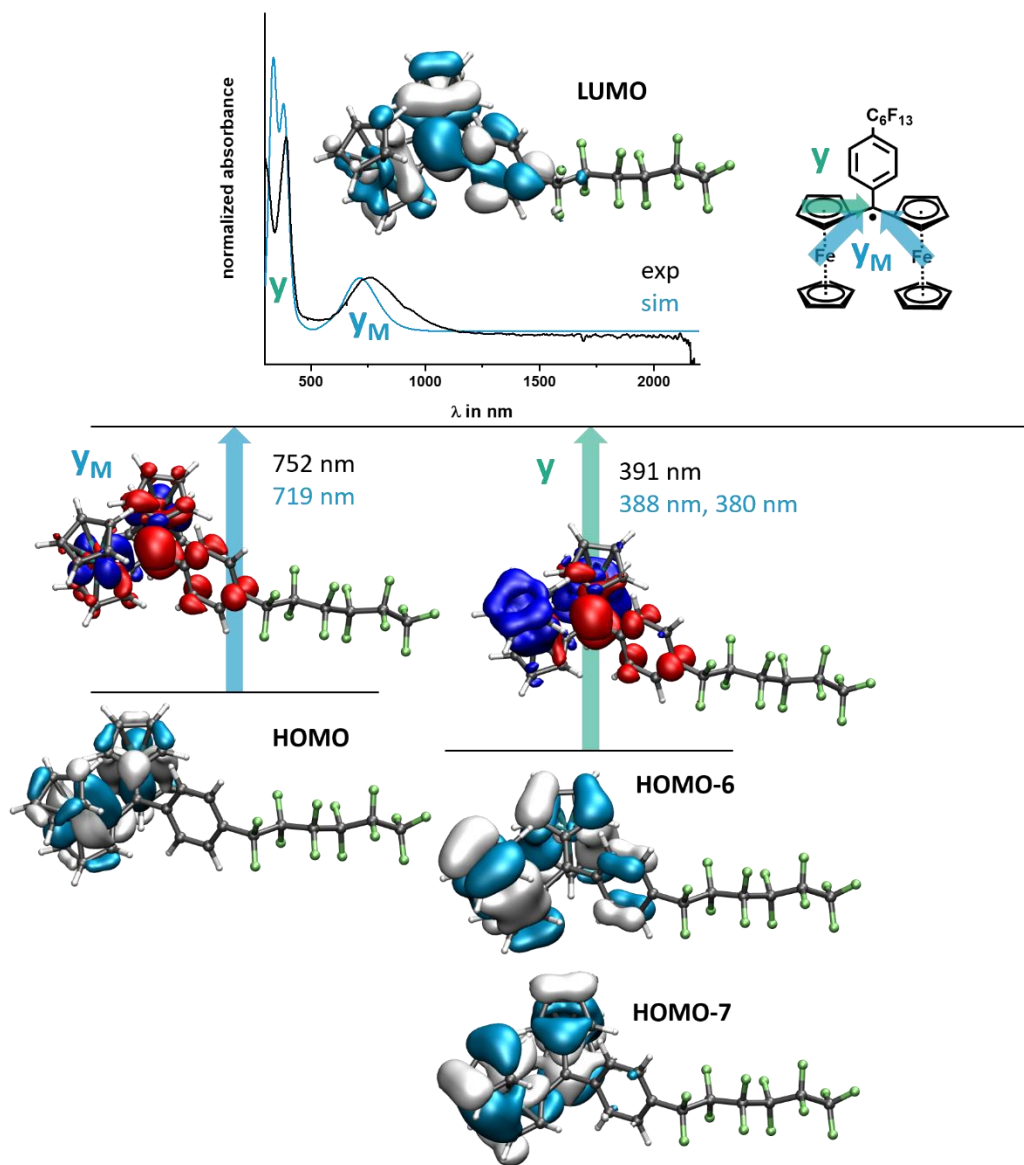

Figure S73: Molecular orbital contributions to major transitions of complex  $5^+$  calculated *via* TD-DFT, EDDMs (electron density difference maps; blue: loss of electron density; red: gain in electron density). The top panel compares the experimental (black line) and the TD-DFT calculated spectrum (blue line). A schematic assignment of the electronic transitions is given at the top right.

Table S12: UV/Vis/NIR data<sup>[a]</sup> of the complexes in their different redox states.

| complex and redox state | $\lambda$ [nm] ( $\epsilon$ [ $10^3 \cdot \text{Lmol}^{-1} \text{cm}^{-1}$ ]) <sup>[b]</sup> |
|-------------------------|----------------------------------------------------------------------------------------------|
| <b>1°</b>               | 561 (3.2), 516 (2.0), 348 (10.9)                                                             |
| <b>1<sup>+</sup></b>    | 743 (5.3), 423 (9.7), 393 (10.8)                                                             |
| <b>1<sup>2+</sup></b>   | 727 (1.9), 498 (3.7), 427 (5.1), 383 (6.4)                                                   |
| <b>2°</b>               | 563 (4.2), 511 (2.7), 391 (3.9), 345 (11.2)                                                  |
| <b>2<sup>+</sup></b>    | 743 (7.0), 426 (12.3), 391 (13.6)                                                            |
| <b>2<sup>2+</sup></b>   | 455 (4.0)                                                                                    |
| <b>3°</b>               | 560 (3.3), 524 (2.9), 346 (8.2)                                                              |
| <b>3<sup>+</sup></b>    | 743 (6.0), 384 (13.1)                                                                        |
| <b>3<sup>2+</sup></b>   | -                                                                                            |
| <b>4°</b>               | 1114 (0.5), 549 (5.4), 346 (9.8)                                                             |
| <b>4<sup>+</sup></b>    | 761 (6.8), 389 (11.4)                                                                        |
| <b>4<sup>2+</sup></b>   | 745 (2.2), 495 (1.8), 377 (6.1)                                                              |
| <b>5°</b>               | 541 (3.7), 355 (7.9)                                                                         |
| <b>5<sup>+</sup></b>    | 752 (2.5), 391 (4.2)                                                                         |
| <b>5<sup>2+</sup></b>   | 739 (1.7), 628 (1.2), 384 (5.0)                                                              |

[a] In 1,2-C<sub>2</sub>H<sub>4</sub>Cl<sub>2</sub>/0.25 mM NBu<sub>4</sub><sup>+</sup> [BArF<sub>24</sub>]<sup>-</sup> at 293(±3) K. [b] Absorption coefficients ±50 L·mol<sup>-1</sup> cm<sup>-1</sup>.

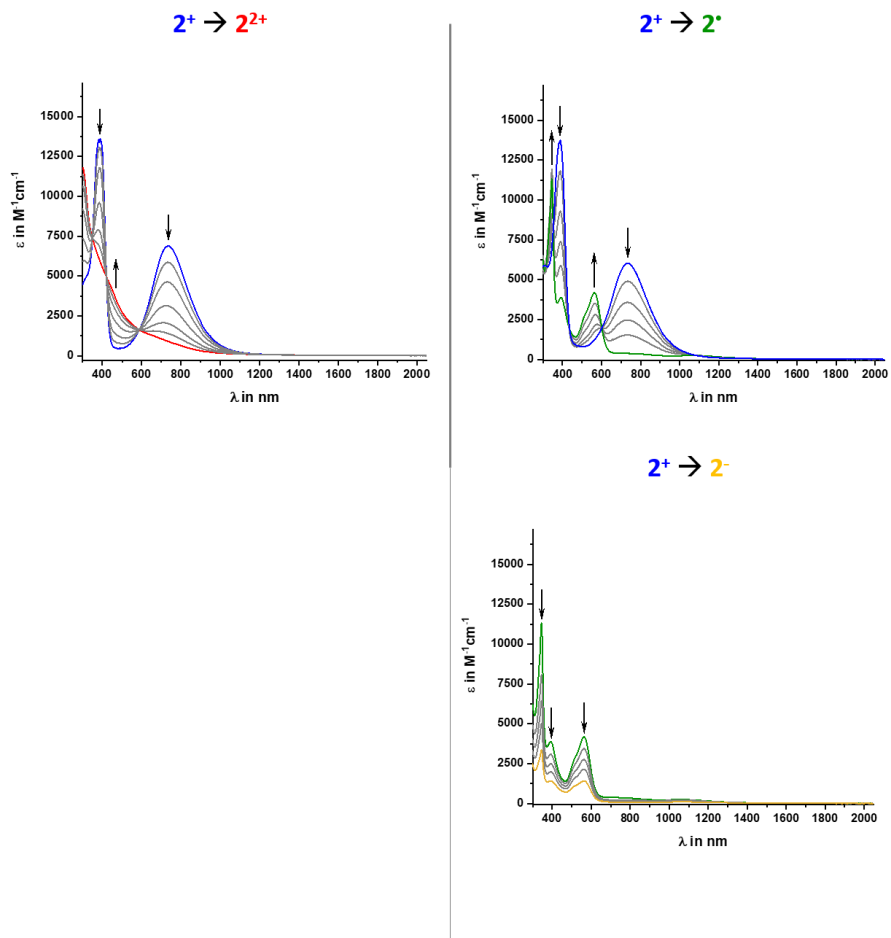

Figure S74: Spectroelectrochemistry of complex  $2^+$ . Left: Oxidation from  $2^+$  (blue line) to  $2^{2+}$  (red line); top right: first reduction from  $2^+$  (blue line) to  $2^\bullet$  (green line); bottom right: second reduction from  $2^+$  (green line) to  $2^-$  (yellow line).

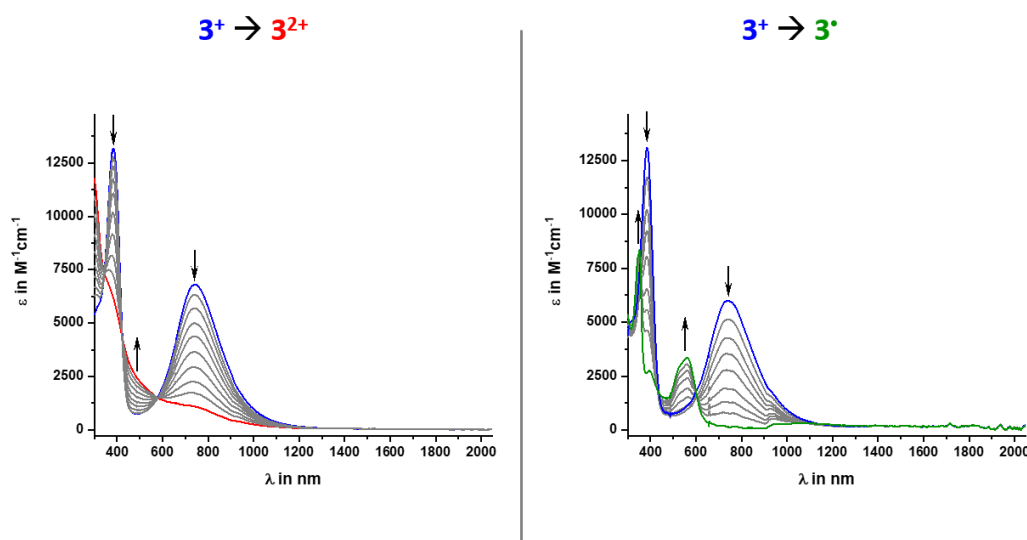

Figure S75: Spectroelectrochemistry of complex  $3^+$ . Left: Oxidation from  $3^+$  (blue line) to  $3^{2+}$  (red line); right: reduction from  $3^+$  (blue line) to  $3^\bullet$  (green line).

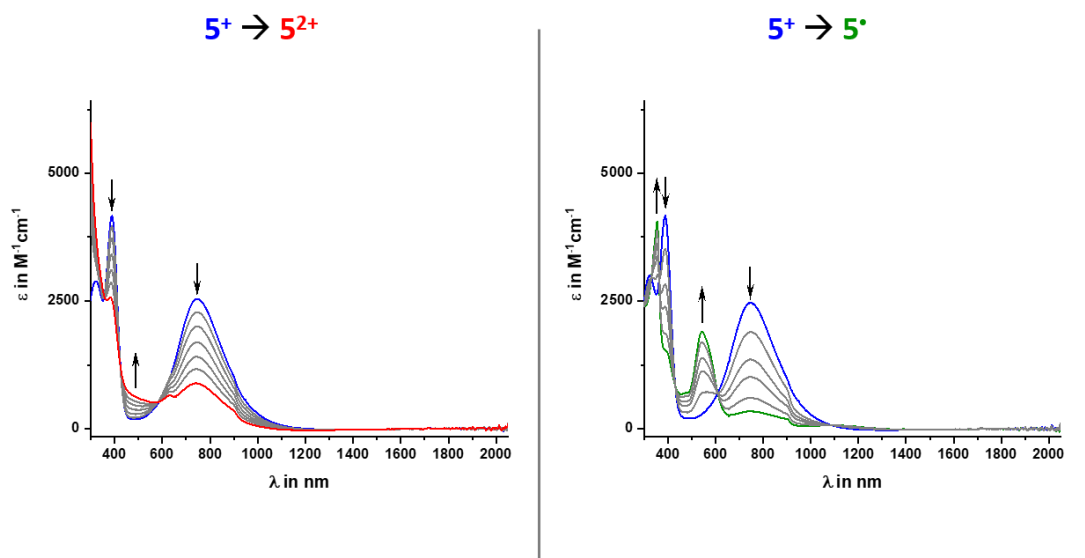

Figure S76: Spectroelectrochemistry of complex  $5^+$ . Left: Oxidation from  $5^+$  (blue line) to  $5^{2+}$  (red line); right: reduction from  $5^+$  (blue line) to  $5^\bullet$  (green line).

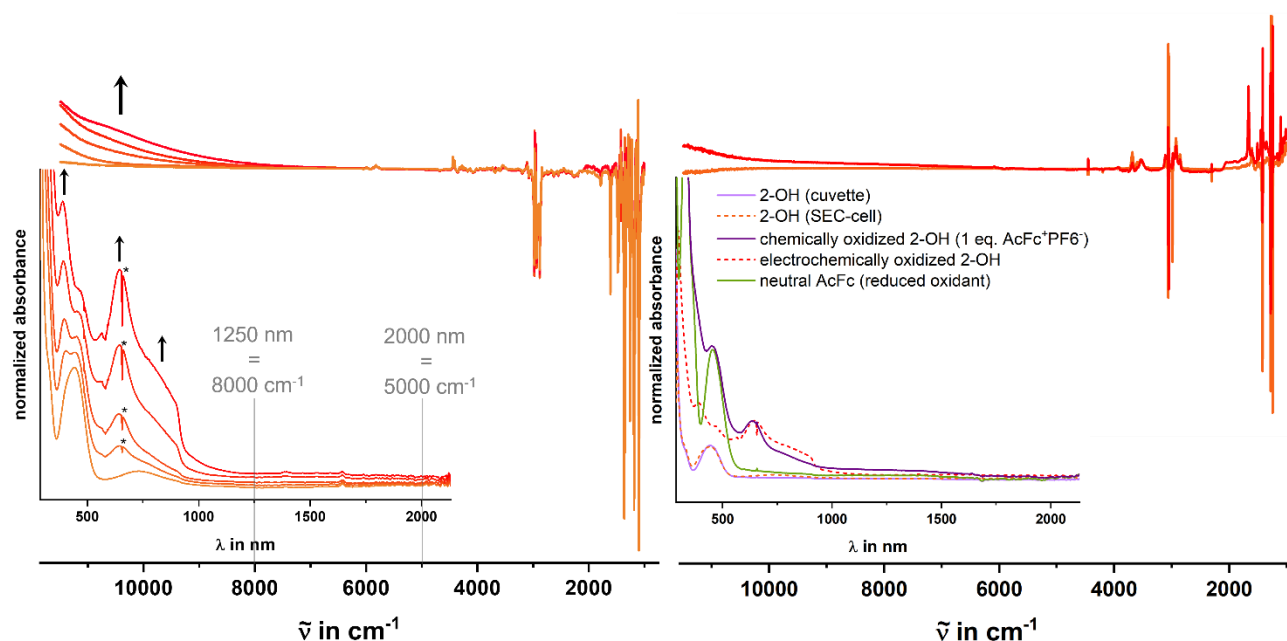

Figure S77: IR and Vis/NIR spectroelectrochemistry (left) and chemically oxidized (1 eq. acetylferrocenium  $PF_6^-$ ) spectra (right) of complex  $2-OH$ . Left: Oxidation from  $2-OH$  (orange line) to  $2-OH^+$  (red line); no IVCT bands are observed between 1250 nm ( $8000\text{ cm}^{-1}$ ) and 2000 nm ( $5000\text{ cm}^{-1}$ ); right: neutral carbinol  $2-OH$  (orange line in IR), chemically oxidized  $2-OH^+$  (red line in IR), in the Vis/NIR spectrum: cf. legend; for comparison: neutral acetylferrocene (AcFc, green line) and data from electrochemistry (cf. dotted line), note that nm- and  $cm^{-1}$ -scales are not linearly comparable.

## T-dependent and quantitative EPR Spectroscopy

Table S13: EPR data for all complexes.<sup>[a]</sup>

|           | $g_{\text{iso}}^{[b]}$ | $DI$<br>(20°C) | $c_{\text{spin}}$<br>[mM] | $c_{\text{spin}}/$<br>$c_{\text{nom}}$<br>[b,c] | <i>dimer</i><br><i>amount</i><br>[b,c] |
|-----------|------------------------|----------------|---------------------------|-------------------------------------------------|----------------------------------------|
| <b>1°</b> | 2.0267                 | 0.16           | 4.7<br>±0.48              | 24<br>±8                                        | 76<br>±8                               |
| <b>2°</b> | 2.0270                 | 0.12           | 3.4<br>±0.34              | 17<br>±6                                        | 83<br>±6                               |
| <b>3°</b> | 2.0282                 | 0.23           | 6.8<br>±0.68              | 34<br>±12                                       | 66<br>±12                              |
| <b>4°</b> | 2.0301                 | 0.17           | 4.9<br>±0.50              | 25<br>±9                                        | 75<br>±9                               |
| <b>5°</b> | 2.0284                 | 0.24           | 7.0<br>±0.71              | 35<br>±12                                       | 65<br>±12                              |

[a] All samples were reduced with a slight excess (1.1 equiv.) of cobaltocene and contained a nominal concentration  $c_{\text{nom}}$  of 20±5 mM. [b] At 20 °C. [c] in %.

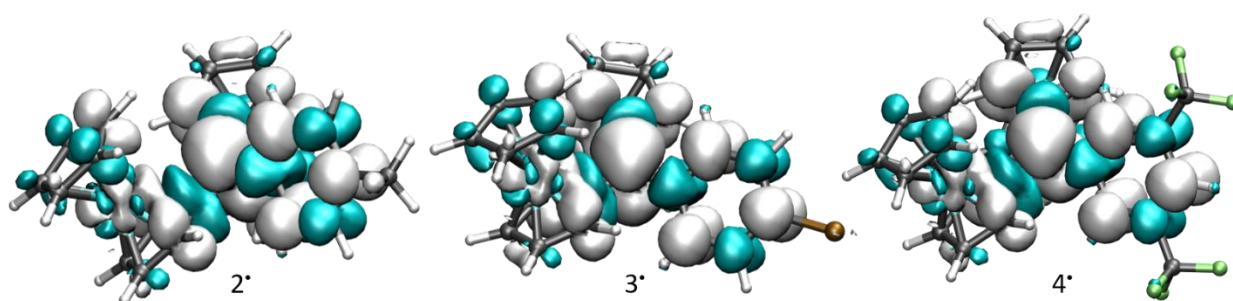

Figure S78: DFT-calculated spin density distributions for the reduced complexes **2°** - **4°**.

## T-dependent EPR Spectroscopy

According to the Maxwell-Boltzmann relation of Equation 1, the signal intensity of a free radical is supposed to increase upon cooling due to a higher difference  $\Delta N$  in occupancy between the ground and the excited states.

$$\Delta N \approx N \cdot \frac{g \cdot \mu_B \cdot B_0}{2k_B T} \quad (1)$$

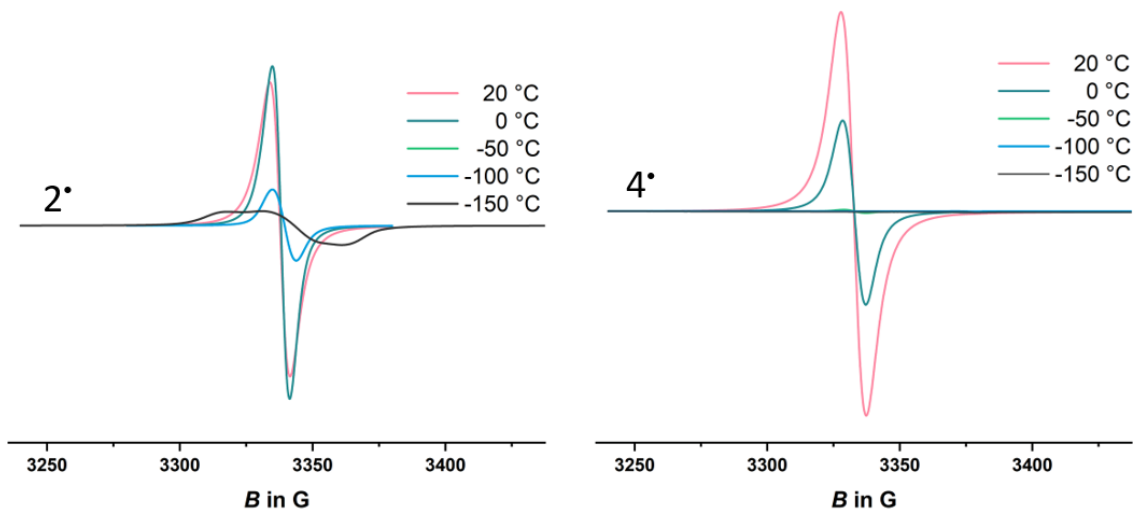

Figure S79: T-dependent EPR spectra of  $2^\bullet$  and  $4^\bullet$  recorded in  $\text{CH}_2\text{Cl}_2$ .

### Spin counting quantification method

According to Eaton et al.,<sup>1</sup> the spin count of an EPR sample can be measured by its double integral DI through Equation 2. Therefore, it is crucial to use the same sample preparation and measurement parameters for every measurement. This has been ensured for all quantitative analysis of this work (cf. Experimental Section).

$$DI = c_{ns} \frac{\sqrt{P} \cdot B_m \cdot Q \cdot n_B \cdot S \cdot (S + 1) \cdot n_s}{f(B_1, B_m)} \quad (2)$$

|               |                                                                      |
|---------------|----------------------------------------------------------------------|
| $DI$          | Double Integral                                                      |
| $c_{ns}$      | Setup constant                                                       |
| $P$           | Microwave power                                                      |
| $B_m$         | Modulation amplitude                                                 |
| $Q$           | Resonator's quality factor                                           |
| $n_B$         | Boltzmann factor for temperature dependence                          |
| $S$           | Total electron spin (1/2)                                            |
| $n_s$         | Number of spins in the sample                                        |
| $f(B_1, B_m)$ | Spatial distribution of microwave and modulation field in the sample |

Evaluation of the data recorded at 20 °C has been done as follows:<sup>2</sup>

- 1) The background corrected spectrum (spectrum of pure CH<sub>2</sub>Cl<sub>2</sub>) was subtracted from the acquired spectrum
- 2) Zero-offset correction was applied
- 3) First integration was performed
- 4) Baseline correction of the first integration was applied
- 5) Second integration was performed
- 6) Double integral was determined from the results of the second integration
- 7) The spin concentration  $c_{spin}$  was determined *via* the linear equation established with the aid of the DPPH calibration curve (cf. Figure S80, Equation 3)
- 8) Calculated spin concentrations were then compared with the nominal concentrations  $c_{red}$  (Equation 4)

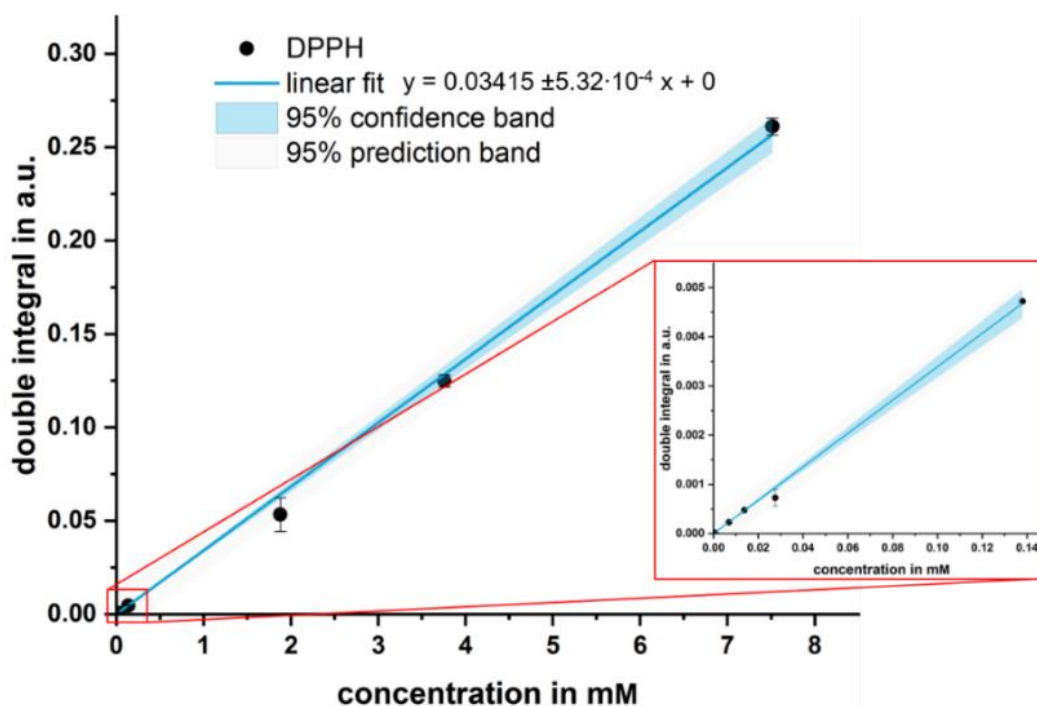

Figure S80: Calibration curve for quantitative EPR evaluation with 95% confidence and prediction band; lower right corner: magnification of the low concentration region.<sup>2</sup>

$$b(\text{slope}) = \frac{DI}{c_{spin}} \Rightarrow c_{spin} = \frac{DI}{b} = \frac{DI}{0.003415} \text{ mM} \quad (3)$$

$$c_{red} = \frac{m}{M \cdot V} \quad (4)$$

Uncertainties (starting from:  $u_m = 0.05$  mg,  $u_v = 50$   $\mu$ L,  $u_b = 5.32 \cdot 10^{-4}$  for the calibration slope,  $u_{DI} = 10\%$  of the value of DI) were calculated using the GAUSSIAN formula for the propagation of uncertainties (5-7). Not included in these calculations is the error due to evaporation of solvent during sample preparation.



$$u_{c_{spin}} = \sqrt{\left(\frac{\partial c_{spin}}{\partial b} \cdot u_b\right)^2 + \left(\frac{\partial c_{spin}}{\partial DI} \cdot u_{DI}\right)^2} = \sqrt{\left(-\frac{DI}{b^2} \cdot u_b\right)^2 + \left(\frac{1}{b} \cdot u_{DI}\right)^2} \quad (5)$$

$$u_{c_{red}} = \sqrt{\left(\frac{\partial c_{red}}{\partial m} \cdot u_m\right)^2 + \left(\frac{\partial c_{red}}{\partial V} \cdot u_V\right)^2} = \sqrt{\left(\frac{1}{M \cdot V} \cdot u_m\right)^2 + \left(-\frac{m}{M \cdot V^2} \cdot u_V\right)^2} \quad (6)$$

$$\begin{aligned} u_{c_{spin}/c_{red}} = u_{ratio} &= \sqrt{\left(\frac{\partial ratio}{\partial c_{spin}} \cdot u_{c_{spin}}\right)^2 + \left(\frac{\partial ratio}{\partial c_{red}} \cdot u_{c_{red}}\right)^2} \quad (7) \\ &= \sqrt{\left(\frac{1}{c_{red}} \cdot u_{c_{spin}}\right)^2 + \left(-\frac{c_{spin}}{c_{red}^2} \cdot u_{c_{red}}\right)^2} \cdot 100 \text{ in [\%]} \end{aligned}$$

Table S13 compiles all quantitative data, including the measured double integrals DI, the derived spin concentrations  $c_{spin}$  and the concentrations of the complexes with their error margins, as well as a comparison between the two concentrations for all investigated complexes **1<sup>•</sup>-5<sup>•</sup>**. In the absence of dimerization, the concentration of the reduced complex in solution is expected to be equal to the nominal concentration of spins [as reduction should be complete using 1.1 eq. of cobaltocene as the reducing agent in a partially reversible reduction process as in this case, cf. CV]. As noted in Table S13, the spin concentrations are far lower than the complex concentrations suggesting a dimerization process with the difference between the two concentrations ( $100\% - c_{spin}/c_{red}$ ) amounting to the dimerization ratio.

## References

- 1 G. R. Eaton, S. S. Eaton, D. P. Barr and R. T. Weber, *Quantitative EPR: A Practitioners Guide*, Springer Verlag, Vienna, Austria, 1st edn., 2010.
- 2 L. A. Casper, L. Wursthorn, M. Geppert, P. Roser, M. Linseis, M. Drescher and R. F. Winter, *Organometallics*, 2020, **39**, 3275–3289.
